# Supplementary material for: Multi-proxy assessment of brachiopod shell calcite as a potential archive of seawater temperature and oxygen isotope composition
Source: Copernicus journal article supplement (doi:10.5194/bg-20-1381-2023), 2023-04-12

# $\Delta_{47}$ Analysis Report — T. Letulle, Jan 2020

Laboratoire des Sciences du Climat et de l'Environnement  
Compiled by M. Daëron ([daeron@lsce.ipsl.fr](mailto:daeron@lsce.ipsl.fr)) on 2023/03/15

|                                                                               |                          |
|-------------------------------------------------------------------------------|--------------------------|
| Number of analytical sessions                                                 | 3                        |
| Number of samples (standards + unknowns)                                      | 32 (3 + 29)              |
| Number of analyses (standards + unknowns)                                     | 127 (52+ 75)             |
| Overall percentage of standard analyses                                       | 41 %                     |
| Nominal $\Delta_{47}$ of anchor ETH-1                                         | 0.2052 ‰                 |
| Nominal $\Delta_{47}$ of anchor ETH-2                                         | 0.2085 ‰                 |
| Nominal $\Delta_{47}$ of anchor ETH-3                                         | 0.6132 ‰                 |
| External reproducibility of $\delta^{13}\text{C}_{\text{VPDB}}$ measurements  | 7.3 ppm                  |
| External reproducibility of $\delta^{18}\text{O}_{\text{VSMOW}}$ measurements | 21.5 ppm                 |
| External reproducibility of $\Delta_{47}$ measurements                        | 8.8 ppm                  |
| Regression model degrees of freedom                                           | 89 ( $t_{95\%} = 1.99$ ) |

## Analytical sessions

| Session                                            |                          | 2020-01a           | 2020-01b           | 2020-02a           |
|----------------------------------------------------|--------------------------|--------------------|--------------------|--------------------|
| N of anchor analyses                               |                          | 18                 | 19                 | 15                 |
| N of unknown analyses                              |                          | 25                 | 34                 | 16                 |
| Working gas $\delta^{13}\text{C}$                  | (‰ VPDB)                 | −3.86              | −3.86              | −3.86              |
| Working gas $\delta^{18}\text{O}$                  | (‰ VSMOW)                | 35.07              | 35.08              | 35.06              |
| Working gas $\Delta_{47}$                          | (‰ ± SE)                 | $0.955 \pm 0.012$  | $0.960 \pm 0.013$  | $0.954 \pm 0.014$  |
| Scrambling factor (a)                              | (± SE)                   | $0.859 \pm 0.010$  | $0.846 \pm 0.010$  | $0.845 \pm 0.011$  |
| Compositional slope (b)                            | ( $\times 10^{-4}$ ± SE) | $1.6 \pm 1.7$      | $1.5 \pm 1.7$      | $1.7 \pm 1.9$      |
| Working gas offset (c)                             | (± SE)                   | $-0.820 \pm 0.004$ | $-0.812 \pm 0.005$ | $-0.807 \pm 0.005$ |
| $\delta^{13}\text{C}_{\text{VPDB}}$ repeatability  | (ppm)                    | 9.0                | 6.5                | 7.7                |
| $\delta^{18}\text{O}_{\text{VSMOW}}$ repeatability | (ppm)                    | 20.1               | 21.4               | 26.9               |
| $\Delta_{47}$ repeatability                        | (ppm)                    | 9.7                | 10.9               | 7.1                |

| Sample       | N  | Yield<br>(%) | $\delta^{13}\text{C}_{\text{VPDB}}$ | $\delta^{18}\text{O}_{\text{VSMOW}}$<br>(CO <sub>2</sub> ) | $\delta^{18}\text{O}_{\text{VPDB}}$<br>(calcite*) | $\Delta_{47}$ (I-CDES) |               |                 | p-value<br>(Levene) |
|--------------|----|--------------|-------------------------------------|------------------------------------------------------------|---------------------------------------------------|------------------------|---------------|-----------------|---------------------|
|              |    |              |                                     |                                                            |                                                   | $\pm$ SE               | ( $\pm$ 95 %) | SD              |                     |
| ETH-1        | 13 | 100          | 2.01                                | 37.01                                                      | −2.21                                             | 0.2052                 |               | 0.0088          |                     |
| ETH-2        | 13 | 100          | −10.17                              | 19.88                                                      | −18.68                                            | 0.2085                 |               | 0.0102          |                     |
| ETH-3        | 26 | 97           | 1.71                                | 37.46                                                      | −1.78                                             | 0.6132                 |               | 0.0060          |                     |
| ARD_01       | 3  | 87           | 2.82                                | 37.49                                                      | −1.74                                             | 0.5883                 | $\pm$ 0.0054  | ( $\pm$ 0.0108) | 0.38                |
| ARD_03       | 2  | 99           | 2.46                                | 36.64                                                      | −2.56                                             | 0.5955                 | $\pm$ 0.0065  | ( $\pm$ 0.0130) | 0.0028              |
| ARD_04_biv   | 4  | 99           | 2.75                                | 36.83                                                      | −2.37                                             | 0.5851                 | $\pm$ 0.0048  | ( $\pm$ 0.0095) | 0.0062              |
| ARD_05_am    | 5  | 94           | 0.37                                | 38.86                                                      | −0.42                                             | 0.5920                 | $\pm$ 0.0043  | ( $\pm$ 0.0085) | 0.0079              |
| CDL_02_am    | 1  | 80           | 1.65                                | 34.93                                                      | −4.20                                             | 0.5351                 | $\pm$ 0.0089  | ( $\pm$ 0.0177) |                     |
| CDL_03_biv1  | 1  | 93           | 2.87                                | 33.04                                                      | −6.02                                             | 0.4950                 | $\pm$ 0.0089  | ( $\pm$ 0.0177) |                     |
| CDL_20_am    | 1  | 98           | 0.63                                | 35.28                                                      | −3.87                                             | 0.5139                 | $\pm$ 0.0089  | ( $\pm$ 0.0177) |                     |
| NAMELESS-1   | 1  | 99           | 4.03                                | 37.71                                                      | −1.53                                             | 0.5449                 | $\pm$ 0.0091  | ( $\pm$ 0.0180) |                     |
| NAMELESS-2   | 1  | 100          | 4.27                                | 36.53                                                      | −2.67                                             | 0.5560                 | $\pm$ 0.0091  | ( $\pm$ 0.0180) |                     |
| NAMELESS-3   | 1  | 101          | 2.41                                | 36.36                                                      | −2.83                                             | 0.5434                 | $\pm$ 0.0089  | ( $\pm$ 0.0178) |                     |
| NAMELESS-4   | 1  | 100          | 3.51                                | 36.93                                                      | −2.28                                             | 0.5604                 | $\pm$ 0.0091  | ( $\pm$ 0.0180) |                     |
| NAMELESS-5   | 1  | 100          | 3.08                                | 36.98                                                      | −2.23                                             | 0.5532                 | $\pm$ 0.0091  | ( $\pm$ 0.0180) |                     |
| POLO_13_D    | 2  | 91           | 4.76                                | 36.35                                                      | −2.84                                             | 0.6283                 | $\pm$ 0.0066  | ( $\pm$ 0.0131) | 0.0143              |
| POLO_18_D    | 3  | 86           | 4.23                                | 36.90                                                      | −2.31                                             | 0.6247                 | $\pm$ 0.0054  | ( $\pm$ 0.0108) | 0.0173              |
| POLO_21_D    | 5  | 92           | 4.94                                | 36.97                                                      | −2.24                                             | 0.6180                 | $\pm$ 0.0045  | ( $\pm$ 0.0088) | 0.0101              |
| POLO_29a_V   | 2  | 100          | −1.21                               | 24.53                                                      | −14.21                                            | 0.5752                 | $\pm$ 0.0068  | ( $\pm$ 0.0134) | 0.0071              |
| POLO_2_D     | 2  | 90           | 4.59                                | 37.42                                                      | −1.81                                             | 0.6279                 | $\pm$ 0.0065  | ( $\pm$ 0.0129) | 0.0028              |
| POLO_33_D    | 2  | 81           | 4.19                                | 36.85                                                      | −2.36                                             | 0.6270                 | $\pm$ 0.0066  | ( $\pm$ 0.0131) | 0.0083              |
| POLO_35a_D   | 3  | 95           | 3.75                                | 37.51                                                      | −1.73                                             | 0.6151                 | $\pm$ 0.0054  | ( $\pm$ 0.0108) | 0.0018              |
| POLO_49_D    | 1  | 88           | 4.03                                | 37.26                                                      | −1.96                                             | 0.6457                 | $\pm$ 0.0091  | ( $\pm$ 0.0182) |                     |
| POLO_5b_D    | 5  | 93           | 4.21                                | 36.86                                                      | −2.35                                             | 0.6209                 | $\pm$ 0.0043  | ( $\pm$ 0.0086) | 0.0079              |
| Scro_1_v     | 3  | 98           | 2.74                                | 41.49                                                      | 2.11                                              | 0.6387                 | $\pm$ 0.0055  | ( $\pm$ 0.0109) | 0.0072              |
| Sglo_M2_v    | 2  | 98           | 2.82                                | 40.26                                                      | 0.93                                              | 0.6210                 | $\pm$ 0.0066  | ( $\pm$ 0.0131) | 0.0135              |
| Sglo_M2_v_cp | 3  | 95           | 1.88                                | 40.30                                                      | 0.96                                              | 0.6388                 | $\pm$ 0.0055  | ( $\pm$ 0.0109) | 0.0104              |
| Tcub_2_v     | 5  | 97           | 1.76                                | 40.49                                                      | 1.14                                              | 0.6248                 | $\pm$ 0.0043  | ( $\pm$ 0.0086) | 0.0094              |
| Tdes_b2_v    | 2  | 98           | 2.59                                | 39.61                                                      | 0.30                                              | 0.6086                 | $\pm$ 0.0066  | ( $\pm$ 0.0131) | 0.0096              |
| Tdes_g1_v    | 4  | 98           | 2.70                                | 39.53                                                      | 0.22                                              | 0.6049                 | $\pm$ 0.0048  | ( $\pm$ 0.0095) | 0.0117              |
| Tgal_3_v     | 5  | 97           | 1.98                                | 40.63                                                      | 1.28                                              | 0.6312                 | $\pm$ 0.0043  | ( $\pm$ 0.0086) | 0.0067              |
| Tpli_2_v     | 4  | 98           | 2.77                                | 39.48                                                      | 0.18                                              | 0.5974                 | $\pm$ 0.0047  | ( $\pm$ 0.0094) | 0.0062              |

\* computed assuming the sample is pure calcite; adjust accordingly for different mineralogies.

For example, for aragonite samples,  $\delta^{18}\text{O}_{\text{arag}} = (1000 + \delta^{18}\text{O}_{\text{calcite}}) \times 1.00813 / {}^{18}\alpha_{\text{arag}} - 1000$

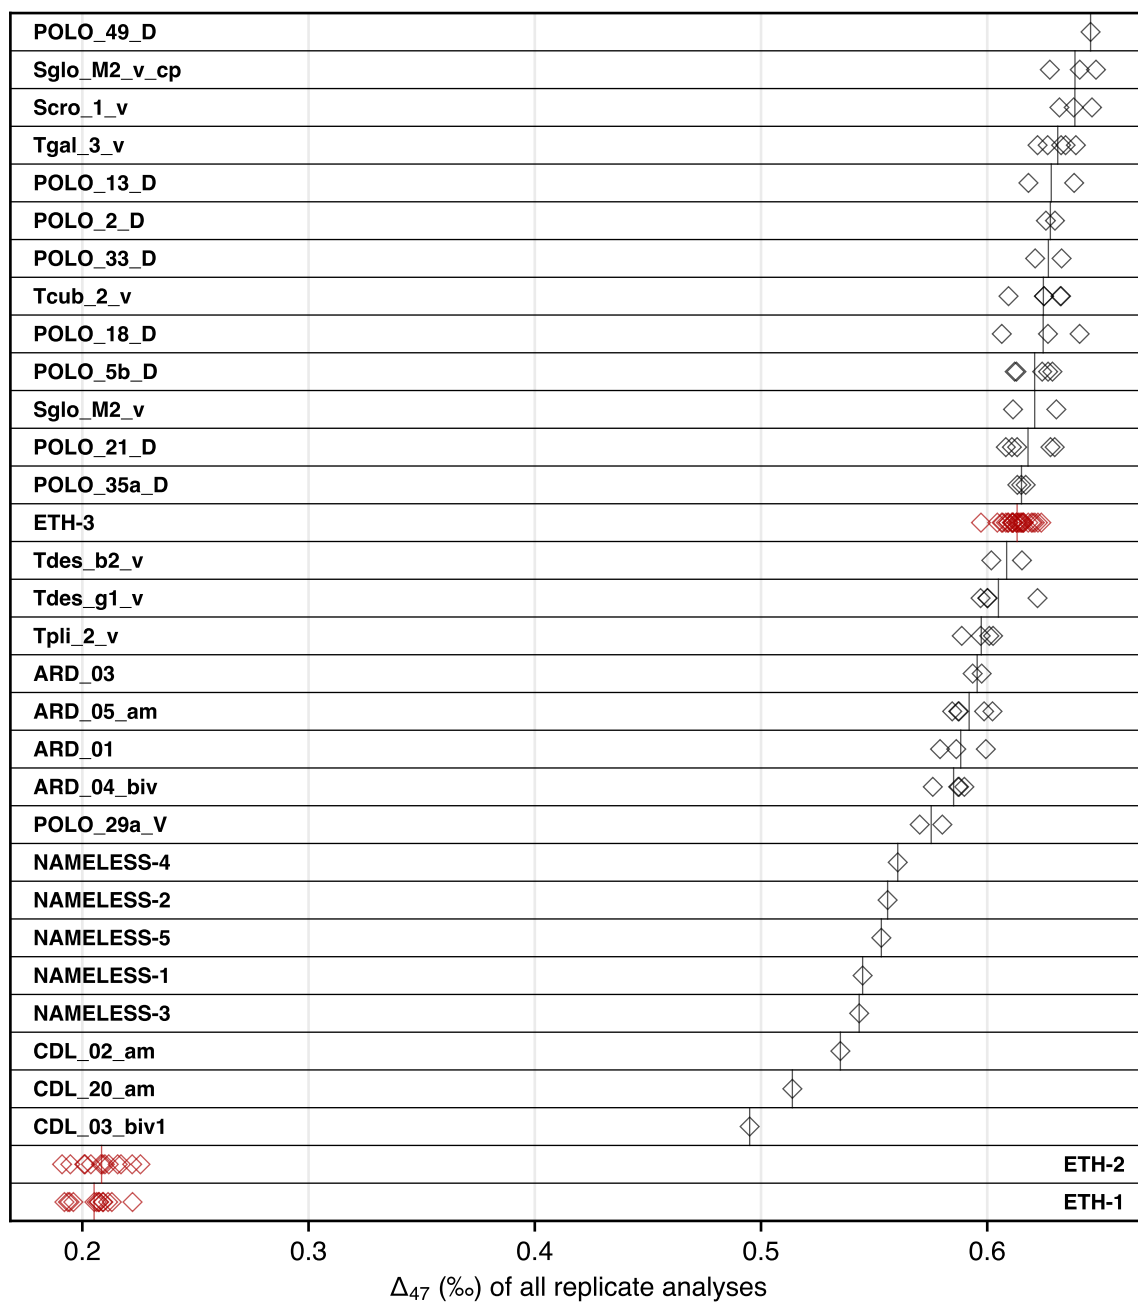



## Methods

Carbonate samples were converted to CO<sub>2</sub> by phosphoric acid reaction at 90 °C in a common, stirred acid bath for 15 minutes. Initial phosphoric acid concentration was 103 % (1.91 g/cm<sup>3</sup>) and each batch of acid was used for 7 days. After cryogenic removal of water, the evolved CO<sub>2</sub> was helium-flushed at 25 mL/min through a purification column packed with Porapak Q (50/80 mesh, 1 m length, 2.1 mm ID) and held at −20 °C, then quantitatively recollected by cryogenic trapping and transferred into an Isoprime 100 dual-inlet mass spectrometer equipped with six Faraday collectors (m/z 44–49). Each analysis took about 2.5 hours, during which analyte gas and working reference gas were allowed to flow from matching, 10 mL reservoirs into the source through deactivated fused silica capillaries (65 cm length, 110 μm ID). Every 20 minutes, gas pressures were adjusted to achieve m/z = 44 current of 80 nA, with differences between analyte gas and working gas generally below 0.1 nA. Pressure-dependent background current corrections were measured 12 times for each analysis. All background measurements from a given session are then used to determine a mass-specific relationship linking background intensity ( $Z_m$ ), total m/z = 44 intensity ( $I_{44}$ ), and time ( $t$ ):  $Z_m = a + bI_{44} + ct + dt^2$ . Background-corrected ion current ratios ( $\delta_{45}$  to  $\delta_{49}$ ) were converted to  $\delta^{13}\text{C}$ ,  $\delta^{18}\text{O}$ , and “raw”  $\Delta_{47}$  values as described by Daëron *et al.* [2016], using the IUPAC oxygen-17 correction parameters. The isotopic composition ( $\delta^{13}\text{C}$ ,  $\delta^{18}\text{O}$ ) of our working reference gas was computed based on the nominal isotopic composition of carbonate standard ETH-3 [Bernasconi, Müller, *et al.*, 2018] and an oxygen-18 acid fractionation factor of 1.00813 [Kim *et al.*, 2007]. Raw  $\Delta_{47}$  values were then converted to the I-CDES  $\Delta_{47}$  reference frame by comparison with four “ETH” carbonate standards [Bernasconi, Daëron, *et al.*, 2021] using a pooled regression approach [Daëron, 2021]. Full analytical errors are derived from the external reproducibility of unknowns and standards ( $N_f = 89$ ) and conservatively account for the uncertainties in raw  $\Delta_{47}$  measurements as well as those associated with the conversion to the “absolute”  $\Delta_{47}$  reference frame.

## References

- Bernasconi, S. M., Daëron, M., Bergmann, K. D., Bonifacie, M., Meckler, A. N., Affek, H. P., Anderson, N., Bajnai, D., Barkan, E., Beverly, E., Blamart, D., Burgener, L., Calmels, D., Chaduteau, C., Clog, M., Davidheiser-Kroll, B., Davies, A., Dux, F., Eiler, J., Elliot, B., Fetrow, A. C., Fiebig, J., Goldberg, S., Hermoso, M., Huntington, K. W., Hyland, E., Ingalls, M., Jaggi, M., John, C. M., Jost, A. B., Katz, S., Kelson, J., Kluge, T., Kocken, I. J., Laskar, A., Leutert, T. J., Liang, D., Lucarelli, J., Mackey, T. J., Mangenot, X., Meinicke, N., Modestou, S. E., Müller, I. A., Murray, S., Neary, A., Packard, N., Passey, B. H., Pelletier, E., Petersen, S., Piasecki, A., Schauer, A., Snell, K. E., Swart, P. K., Tripathi, A., Upadhyay, D., Vennemann, T., Winkelstern, I., Yarian, D., Yoshida, N., Zhang, N. & Ziegler, M. (2021). InterCarb: A community effort to improve inter-laboratory standardization of the carbonate clumped isotope thermometer using carbonate standards. In review (Geochemistry, Geophysics, Geosystems) <https://www.essoar.org/pdfs/10.1002/essoar.10504430.4>.
- Bernasconi, S. M., Müller, I. A., Bergmann, K. D., Breitenbach, S. F. M., Fernandez, A., Hodell, D. A., Meckler, A. N., Millan, I. & Ziegler, M. (2018). Reducing uncertainties in carbonate clumped isotope analysis through consistent carbonate-based standardization. *Geochemistry, Geophysics, Geosystems* 19. doi: [10.1029/2017GC007385](https://doi.org/10.1029/2017GC007385).
- Daëron, M. (2021). Full propagation of analytical uncertainties in  $\Delta_{47}$  measurements. In review (Geochemistry, Geophysics, Geosystems) <https://www.essoar.org/pdfs/10.1002/essoar.10505298.1>.
- Daëron, M., Blamart, D., Peral, M. & Affek, H. P. (2016). Absolute isotopic abundance ratios and the accuracy of  $\Delta_{47}$  measurements. *Chemical Geology* 442, pp. 83–96. doi: [10.1016/j.chemgeo.2016.08.014](https://doi.org/10.1016/j.chemgeo.2016.08.014).
- Kim, Sang-Tae, Mucci, Alfonso & Taylor, Bruce E. (2007). Phosphoric acid fractionation factors for calcite and aragonite between 25 and 75 °C: Revisited. *Chemical Geology* 246:(3–4), pp. 135–146. doi: [10.1016/j.chemgeo.2007.08.005](https://doi.org/10.1016/j.chemgeo.2007.08.005).

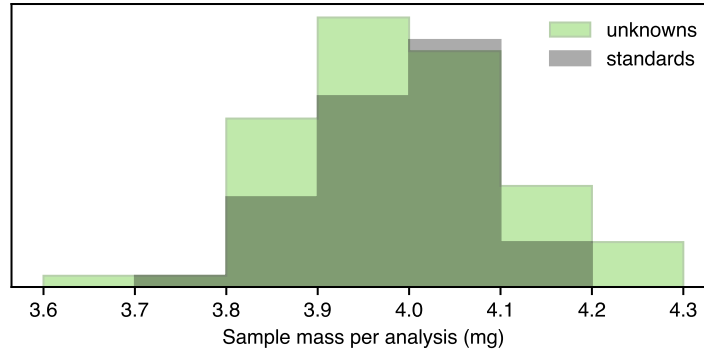

| UID | Session  | Sample       | Mass (mg) | CO <sub>2</sub> yield (if CaCO <sub>3</sub> ) | δ45 (‰ WG) | δ46 (‰ WG) | δ47 (‰ WG) | δ48 (‰ WG) | δ49 (‰ WG) | δ <sup>13</sup> C <sub>V</sub> PDB (‰) | δ <sup>18</sup> O <sub>V</sub> SMOW (‰) | Δ <sub>47</sub> <sup>FW</sup> (‰) | Δ <sub>47</sub> <sup>abs</sup> (‰) |
|-----|----------|--------------|-----------|-----------------------------------------------|------------|------------|------------|------------|------------|----------------------------------------|-----------------------------------------|-----------------------------------|------------------------------------|
| H31 | 2020-01a | ETH-3        | 3.96      | 0.97                                          | 5.229380   | 2.354502   | 7.434898   | 4.600521   | 3.670022   | 1.713                                  | 37.443                                  | -0.285786                         | 0.621067                           |
| H32 | 2020-01a | ETH-1        | 3.93      | 1.00                                          | 5.492236   | 1.899704   | 6.903910   | 3.543907   | 0.787546   | 2.015                                  | 36.979                                  | -0.636351                         | 0.213037                           |
| H33 | 2020-01a | ETH-3        | 4.06      | 0.97                                          | 5.243976   | 2.328544   | 7.411628   | 4.481111   | 0.195612   | 1.730                                  | 37.446                                  | -0.298398                         | 0.606389                           |
| H34 | 2020-01a | ETH-2        | 3.93      | 1.00                                          | -6.324106  | -14.349186 | -21.184007 | -28.631254 | -1.009077  | -10.164                                | 19.875                                  | -0.656618                         | 0.194707                           |
| H35 | 2020-01a | ETH-3        | 4.00      | 0.97                                          | 5.238926   | 2.327536   | 7.415562   | 4.477489   | -0.001853  | 1.724                                  | 37.471                                  | -0.288325                         | 0.618115                           |
| H36 | 2020-01a | ETH-1        | 4.02      | 1.01                                          | 5.496712   | 1.888976   | 6.894681   | 3.524397   | 0.113158   | 2.020                                  | 37.018                                  | -0.639580                         | 0.209280                           |
| H37 | 2020-01a | ETH-3        | 3.80      | 0.96                                          | 5.234893   | 2.345586   | 7.427352   | 4.659241   | -0.726467  | 1.719                                  | 37.510                                  | -0.290188                         | 0.615944                           |
| H38 | 2020-01a | ETH-2        | 4.16      | 1.01                                          | -6.332140  | -14.372654 | -21.209635 | -28.719661 | -0.715018  | -10.172                                | 19.889                                  | -0.651055                         | 0.201189                           |
| H39 | 2020-01a | ETH-3        | 4.05      | 0.98                                          | 5.235039   | 2.288551   | 7.363276   | 4.458984   | -0.155262  | 1.722                                  | 37.466                                  | -0.297994                         | 0.606869                           |
| H40 | 2020-01a | CDL_20_am    | 4.06      | 0.98                                          | 4.157067   | 0.210115   | 4.116500   | 0.298864   | -0.159996  | 0.633                                  | 35.280                                  | -0.378410                         | 0.513857                           |
| H41 | 2020-01a | CDL_02_am    | 4.30      | 0.80                                          | 5.081013   | -0.120002  | 4.761912   | -0.698592  | -3.290252  | 1.645                                  | 34.933                                  | -0.360072                         | 0.535084                           |
| H42 | 2020-01a | POLO_5b_D    | 4.22      | 0.98                                          | 7.733319   | 1.979349   | 9.644612   | 3.902989   | -0.175780  | 4.438                                  | 37.148                                  | -0.293107                         | 0.612131                           |
| H43 | 2020-01a | ETH-1        | 4.06      | 1.02                                          | 5.493345   | 1.852431   | 6.841542   | 3.503199   | -0.272469  | 2.018                                  | 37.024                                  | -0.653030                         | 0.193631                           |
| H46 | 2020-01a | POLO_29a_V   | 3.90      | 0.99                                          | 2.088273   | -9.977205  | -7.997827  | -19.780838 | -0.898277  | -1.223                                 | 24.550                                  | -0.323419                         | 0.580148                           |
| H47 | 2020-01a | ETH-3        | 3.94      | 0.96                                          | 5.221807   | 2.226302   | 7.295343   | 4.322222   | 0.168472   | 1.710                                  | 37.434                                  | -0.290792                         | 0.615266                           |
| H48 | 2020-01a | CDL_03_biv1  | 4.28      | 0.93                                          | 6.150569   | -1.932411  | 4.037457   | -3.929370  | -0.069313  | 2.871                                  | 33.043                                  | -0.394642                         | 0.494973                           |
| H49 | 2020-01a | Tcub_2_v     | 3.86      | 0.97                                          | 5.367257   | 5.120339   | 10.314806  | 10.132025  | -0.366806  | 1.758                                  | 40.494                                  | -0.281868                         | 0.625089                           |
| H50 | 2020-01a | Tgal_3_v     | 3.93      | 0.99                                          | 5.583632   | 5.219308   | 10.645298  | 10.314772  | -0.148208  | 1.989                                  | 40.600                                  | -0.273621                         | 0.634628                           |
| H51 | 2020-01a | ETH-2        | 3.86      | 1.00                                          | -6.333412  | -14.426766 | -21.254942 | -28.747571 | -0.966125  | -10.171                                | 19.883                                  | -0.642054                         | 0.211676                           |
| H52 | 2020-01a | Tdes_g1_v    | 3.98      | 0.98                                          | 6.197227   | 4.192619   | 10.233318  | 8.314966   | -0.154788  | 2.692                                  | 39.519                                  | -0.305963                         | 0.597053                           |
| H53 | 2020-01a | Scro_1_v     | 3.93      | 0.99                                          | 6.302456   | 6.075382   | 12.235340  | 12.171358  | 0.036017   | 2.735                                  | 41.509                                  | -0.275705                         | 0.631904                           |
| H54 | 2020-01a | Sglo_M2_v    | 3.87      | 0.98                                          | 6.343685   | 4.884456   | 11.082006  | 9.600271   | 0.228981   | 2.824                                  | 40.252                                  | -0.293505                         | 0.611398                           |
| H55 | 2020-01a | ETH-1        | 3.92      | 1.00                                          | 5.482692   | 1.821585   | 6.811989   | 3.399438   | -0.209843  | 2.007                                  | 37.022                                  | -0.641189                         | 0.207422                           |
| H56 | 2020-01a | ARD_05_am    | 4.16      | 0.96                                          | 4.004272   | 3.582709   | 7.351022   | 6.984979   | -0.315510  | 0.341                                  | 38.887                                  | -0.314900                         | 0.587188                           |
| H57 | 2020-01a | NAMELESS-3   | 3.89      | 1.01                                          | 5.837459   | 1.195987   | 6.850735   | 2.275467   | -0.230099  | 2.415                                  | 36.362                                  | -0.352604                         | 0.543387                           |
| H58 | 2020-01a | Tdes_b2_v    | 3.66      | 0.97                                          | 6.111168   | 4.282068   | 10.236766  | 8.453719   | -1.421379  | 2.595                                  | 39.622                                  | -0.301885                         | 0.601800                           |
| H59 | 2020-01a | ETH-3        | 3.83      | 0.96                                          | 5.218319   | 2.224348   | 7.294083   | 4.336894   | -1.166459  | 1.706                                  | 37.452                                  | -0.286547                         | 0.620208                           |
| H60 | 2020-01a | Sglo_M2_v_cp | 3.98      | 0.95                                          | 5.471883   | 4.925764   | 10.233182  | 9.872784   | -0.178755  | 1.879                                  | 40.306                                  | -0.279680                         | 0.627652                           |
| H61 | 2020-01a | Tcub_2_v     | 3.93      | 0.97                                          | 5.360898   | 5.094713   | 10.269265  | 10.025882  | -0.208983  | 1.752                                  | 40.486                                  | -0.295350                         | 0.609401                           |
| H62 | 2020-01a | Tgal_3_v     | 3.92      | 0.97                                          | 5.572771   | 5.240830   | 10.659265  | 10.528332  | 0.085206   | 1.976                                  | 40.640                                  | -0.269711                         | 0.639178                           |
| H63 | 2020-01a | ETH-2        | 4.17      | 0.98                                          | -6.337432  | -14.439670 | -21.262917 | -28.739701 | -0.838321  | -10.175                                | 19.886                                  | -0.633161                         | 0.222031                           |
| H64 | 2020-01a | Tdes_g1_v    | 3.97      | 0.97                                          | 6.202616   | 4.159092   | 10.227582  | 8.048309   | -0.499348  | 2.699                                  | 39.499                                  | -0.284346                         | 0.622221                           |
| H65 | 2020-01a | Tpli_2_v     | 3.90      | 0.97                                          | 6.264711   | 4.125146   | 10.239817  | 8.151612   | -0.269482  | 2.767                                  | 39.464                                  | -0.302654                         | 0.600904                           |
| H66 | 2020-01a | Scro_1_v     | 3.90      | 0.96                                          | 6.300678   | 6.037022   | 12.201028  | 11.958641  | -0.262914  | 2.734                                  | 41.484                                  | -0.270294                         | 0.638210                           |
| H67 | 2020-01a | ETH-3        | 3.92      | 0.95                                          | 5.204875   | 2.202141   | 7.250125   | 4.340244   | -0.776948  | 1.692                                  | 37.437                                  | -0.294603                         | 0.610838                           |
| H68 | 2020-01a | Sglo_M2_v    | 3.85      | 0.98                                          | 6.329393   | 4.892778   | 11.092059  | 9.693348   | -0.696269  | 2.808                                  | 40.277                                  | -0.277058                         | 0.630543                           |
| H69 | 2020-01a | Sglo_M2_v_cp | 3.92      | 0.94                                          | 5.470274   | 4.901250   | 10.218773  | 9.647108   | -0.978592  | 1.878                                  | 40.289                                  | -0.268312                         | 0.640890                           |
| H70 | 2020-01a | Tdes_b2_v    | 3.78      | 0.99                                          | 6.107521   | 4.254748   | 10.217719  | 8.353614   | -0.872706  | 2.592                                  | 39.606                                  | -0.290258                         | 0.615340                           |
| H71 | 2020-01a | ETH-1        | 3.84      | 0.99                                          | 5.482761   | 1.786736   | 6.775814   | 3.458653   | -0.500960  | 2.009                                  | 37.002                                  | -0.642986                         | 0.205336                           |
| H72 | 2020-01a | POLO_18_D    | 4.07      | 0.85                                          | 7.834091   | 1.699313   | 9.484010   | 3.339842   | -1.366844  | 4.557                                  | 36.904                                  | -0.280501                         | 0.626837                           |
| H73 | 2020-01a | POLO_35a_D   | 4.17      | 0.96                                          | 7.150719   | 2.290323   | 9.354581   | 4.508604   | -0.421339  | 3.795                                  | 37.530                                  | -0.288979                         | 0.616990                           |
| H74 | 2020-01a | POLO_2_D     | 4.04      | 0.90                                          | 7.842463   | 2.159198   | 9.947638   | 4.160471   | -1.367546  | 4.549                                  | 37.391                                  | -0.281209                         | 0.625925                           |
| H75 | 2020-01a | ETH-3        | 4.06      | 0.96                                          | 5.219372   | 2.199490   | 7.270029   | 4.365225   | -0.419056  | 1.708                                  | 37.441                                  | -0.287122                         | 0.619543                           |

| UID  | Session  | Sample       | Mass<br>(mg) | CO <sub>2</sub> yield<br>(if CaCO <sub>3</sub> ) | δ45<br>(‰ WG) | δ46<br>(‰ WG) | δ47<br>(‰ WG) | δ48<br>(‰ WG) | δ49<br>(‰ WG) | δ <sup>13</sup> C <sub>V-PDB</sub><br>(‰) | δ <sup>18</sup> O <sub>V-SMOW</sub><br>(‰) | Δ <sup>FW</sup><br>(‰) | Δ <sup>FB</sup><br>(‰) |
|------|----------|--------------|--------------|--------------------------------------------------|---------------|---------------|---------------|---------------|---------------|-------------------------------------------|--------------------------------------------|------------------------|------------------------|
| H77  | 2020-01b | ETH-3        | 4.03         | 0.97                                             | 5.240984      | 2.389667      | 7.461589      | 4.619952      | 0.152105      | 1.725                                     | 37.492                                     | -0.305687              | 0.597227               |
| H78  | 2020-01b | ETH-1        | 3.86         | 1.01                                             | 5.494515      | 1.901692      | 6.921617      | 3.665851      | -0.133818     | 2.018                                     | 36.985                                     | -0.623064              | 0.222180               |
| H79  | 2020-01b | ETH-3        | 3.96         | 0.98                                             | 5.234846      | 2.322458      | 7.400663      | 4.544583      | 0.120332      | 1.721                                     | 37.443                                     | -0.293946              | 0.611116               |
| H80  | 2020-01b | ETH-2        | 4.01         | 1.01                                             | -6.324919     | -14.345273    | -21.162390    | -28.496715    | -0.614753     | -10.165                                   | 19.874                                     | -0.637605              | 0.209968               |
| H81  | 2020-01b | POLO_21_D    | 4.13         | 0.96                                             | 8.280626      | 1.883323      | 10.130608     | 3.623977      | 0.126526      | 5.034                                     | 36.995                                     | -0.277716              | 0.629817               |
| H82  | 2020-01b | POLO_33_D    | 4.10         | 0.82                                             | 7.468005      | 1.715345      | 9.126907      | 3.262489      | 0.013178      | 4.161                                     | 36.829                                     | -0.275289              | 0.632862               |
| H83  | 2020-01b | POLO_13_D    | 4.05         | 0.93                                             | 7.931895      | 1.276566      | 9.158874      | 2.357387      | -0.444183     | 4.680                                     | 36.373                                     | -0.287686              | 0.618204               |
| H84  | 2020-01b | ETH-3        | 3.98         | 0.98                                             | 5.230761      | 2.297808      | 7.370555      | 4.668686      | 0.092534      | 1.717                                     | 37.466                                     | -0.295461              | 0.609330               |
| H85  | 2020-01b | NAMELESS-2   | 3.87         | 1.00                                             | 7.553792      | 1.407950      | 8.845334      | 2.757466      | -0.020828     | 4.265                                     | 36.527                                     | -0.340397              | 0.555955               |
| H86  | 2020-01b | NAMELESS-4   | 3.97         | 1.00                                             | 6.869431      | 1.782750      | 8.513255      | 3.456253      | 0.400767      | 3.511                                     | 36.930                                     | -0.336655              | 0.560437               |
| H87  | 2020-01b | ARD_04_biv   | 4.03         | 0.97                                             | 5.996101      | 1.535651      | 7.389460      | 2.954214      | 0.055491      | 2.574                                     | 36.675                                     | -0.313897              | 0.587536               |
| H88  | 2020-01b | ETH-1        | 3.86         | 1.01                                             | 5.487166      | 1.834413      | 6.821880      | 3.423294      | 0.043408      | 2.012                                     | 36.996                                     | -0.648540              | 0.192085               |
| H89  | 2020-01b | Scro_2_v     | 3.89         | 0.98                                             | 5.371940      | 5.166644      | 10.372056     | 10.187687     | 0.022917      | 1.762                                     | 40.520                                     | -0.275305              | 0.632624               |
| H90  | 2020-01b | Tgal_3_v     | 3.88         | 0.99                                             | 5.573225      | 5.225660      | 10.639147     | 10.382262     | 0.203721      | 1.978                                     | 40.586                                     | -0.275243              | 0.632649               |
| H91  | 2020-01b | Tdes_g1_v    | 3.87         | 1.00                                             | 6.211754      | 4.228125      | 10.286623     | 8.278502      | 0.241133      | 2.707                                     | 39.534                                     | -0.302858              | 0.600070               |
| H92  | 2020-01b | ETH-3        | 4.07         | 0.96                                             | 5.225668      | 2.245720      | 7.326217      | 4.404226      | 0.250410      | 1.714                                     | 37.446                                     | -0.283156              | 0.632883               |
| H93  | 2020-01b | Tpli_2_v     | 3.98         | 0.98                                             | 6.268873      | 4.179784      | 10.295446     | 8.293243      | -0.079424     | 2.770                                     | 39.490                                     | -0.305355              | 0.597118               |
| H94  | 2020-01b | Scro_1_v     | 3.95         | 0.99                                             | 6.307862      | 6.070215      | 12.248248     | 12.027533     | 0.418413      | 2.742                                     | 41.488                                     | -0.263451              | 0.646303               |
| H95  | 2020-01b | Sglo_M2_v_cp | 3.98         | 0.97                                             | 5.477953      | 4.941603      | 10.272737     | 9.732341      | -0.040093     | 1.886                                     | 40.300                                     | -0.262256              | 0.648066               |
| H96  | 2020-01b | ETH-2        | 4.00         | 0.99                                             | -6.324215     | -14.389167    | -21.198644    | -28.696962    | -0.719287     | -10.163                                   | 19.908                                     | -0.631596              | 0.217076               |
| H97  | 2020-01b | POLO_49_D    | 3.98         | 0.88                                             | 7.359771      | 2.067068      | 9.374402      | 4.091246      | 0.640679      | 4.031                                     | 37.263                                     | -0.264413              | 0.625675               |
| H98  | 2020-01b | POLO_sb_D    | 4.02         | 0.90                                             | 7.434795      | 1.234022      | 8.608447      | 2.368840      | -0.055410     | 4.143                                     | 36.384                                     | -0.282630              | 0.624277               |
| H99  | 2020-01b | POLO_29a_V   | 3.94         | 1.01                                             | 2.109276      | -10.011630    | -8.017737     | -19.906438    | -0.800781     | -1.198                                    | 24.518                                     | -0.330918              | 0.570146               |
| H100 | 2020-01b | ETH-3        | 3.98         | 0.97                                             | 5.218071      | 2.229789      | 7.291996      | 4.367927      | -0.411883     | 1.706                                     | 37.445                                     | -0.293701              | 0.611425               |
| H101 | 2020-01b | Tcub_2_v     | 3.86         | 0.99                                             | 5.366486      | 5.104199      | 10.298229     | 10.053658     | -0.226507     | 1.759                                     | 40.483                                     | -0.281700              | 0.625078               |
| H102 | 2020-01b | Tgal_3_v     | 3.95         | 0.95                                             | 5.562660      | 5.293866      | 10.690538     | 10.440899     | -0.417995     | 1.964                                     | 40.684                                     | -0.280261              | 0.626709               |
| H103 | 2020-01b | Tdes_g1_v    | 3.98         | 0.96                                             | 6.205461      | 4.247372      | 10.299198     | 8.370787      | -0.336472     | 2.699                                     | 39.578                                     | -0.302802              | 0.600135               |
| H104 | 2020-01b | ETH-1        | 3.92         | 0.98                                             | 5.482354      | 1.809552      | 6.804521      | 3.343658      | -0.058165     | 2.008                                     | 37.006                                     | -0.636454              | 0.206374               |
| H105 | 2020-01b | Tpli_2_v     | 3.94         | 0.98                                             | 6.263773      | 4.151738      | 10.255241     | 8.232989      | -0.251570     | 2.766                                     | 39.480                                     | -0.312460              | 0.588727               |
| H106 | 2020-01b | ARD_01       | 4.25         | 0.86                                             | 6.233646      | 2.269226      | 8.370743      | 4.319536      | -1.113661     | 2.804                                     | 37.492                                     | -0.303734              | 0.599375               |
| H107 | 2020-01b | ARD_03       | 4.08         | 0.98                                             | 5.880459      | 1.460294      | 7.200584      | 2.832762      | -0.217859     | 2.452                                     | 36.639                                     | -0.308836              | 0.593551               |
| H108 | 2020-01b | ETH-3        | 3.97         | 0.96                                             | 5.222462      | 2.235420      | 7.300115      | 4.460889      | -0.428356     | 1.711                                     | 37.461                                     | -0.295670              | 0.609096               |
| H109 | 2020-01b | NAMELESS-5   | 4.06         | 1.00                                             | 6.469155      | 1.781312      | 8.092000      | 3.425557      | -0.058908     | 3.077                                     | 36.979                                     | -0.342851              | 0.553187               |
| H110 | 2020-01b | NAMELESS-1   | 3.82         | 0.99                                             | 7.371427      | 2.479262      | 9.708636      | 4.868788      | -0.489971     | 4.028                                     | 37.715                                     | -0.349608              | 0.544914               |
| H111 | 2020-01b | ARD_05_am    | 4.14         | 0.94                                             | 4.079110      | 3.568014      | 7.427606      | 7.014675      | -0.089162     | 0.423                                     | 38.874                                     | -0.301386              | 0.602317               |
| H112 | 2020-01b | ETH-2        | 3.88         | 0.99                                             | -6.332912     | -14.423369    | -21.233749    | -28.431631    | -1.029332     | -10.171                                   | 19.892                                     | -0.624320              | 0.225684               |
| H113 | 2020-01b | POLO_18_D    | 4.04         | 0.89                                             | 7.487797      | 1.740022      | 9.178611      | 3.242384      | -0.225466     | 4.182                                     | 36.936                                     | -0.268543              | 0.640828               |
| H114 | 2020-01b | POLO_35a_D   | 4.06         | 0.94                                             | 7.128144      | 2.295759      | 9.333776      | 4.499884      | -0.414398     | 3.771                                     | 37.525                                     | -0.291802              | 0.613308               |
| H115 | 2020-01b | POLO_21_D    | 3.98         | 0.87                                             | 8.195199      | 1.766846      | 9.910667      | 3.419279      | -0.221583     | 4.946                                     | 36.964                                     | -0.293754              | 0.610899               |
| H116 | 2020-01b | ETH-3        | 4.03         | 0.97                                             | 5.231519      | 2.242175      | 7.315424      | 4.539861      | -0.510579     | 1.720                                     | 37.474                                     | -0.296395              | 0.608236               |
| H118 | 2020-01b | POLO_sb_D    | 4.00         | 0.93                                             | 7.540220      | 1.795048      | 9.277035      | 3.425094      | -0.791283     | 4.236                                     | 36.998                                     | -0.278697              | 0.628808               |
| H119 | 2020-01b | POLO_2_D     | 3.95         | 0.91                                             | 7.925522      | 2.220205      | 10.097575     | 4.332055      | -0.2029739    | 4.637                                     | 37.447                                     | -0.277623              | 0.629932               |
| H120 | 2020-01b | ETH-3        | 3.99         | 0.96                                             | 5.216773      | 2.209900      | 7.265046      | 4.269668      | -0.142402     | 1.705                                     | 37.443                                     | -0.299611              | 0.604441               |
| H121 | 2020-01b | POLO_18_D    | 4.15         | 0.82                                             | 7.260061      | 1.661709      | 8.836322      | 3.143400      | -1.044482     | 3.938                                     | 36.860                                     | -0.297699              | 0.606425               |
| H122 | 2020-01b | ARD_04_biv   | 4.04         | 0.99                                             | 6.427088      | 1.750549      | 8.049393      | 3.341033      | 0.067744      | 3.033                                     | 36.956                                     | -0.311817              | 0.589877               |
| H123 | 2020-01b | ARD_01       | 3.98         | 0.88                                             | 6.258758      | 2.248569      | 8.358991      | 4.305392      | -1.374472     | 2.832                                     | 37.483                                     | -0.320863              | 0.579130               |
| H124 | 2020-01b | ETH-1        | 4.03         | 1.01                                             | 5.483790      | 1.785417      | 6.773323      | 3.279583      | -0.293235     | 2.010                                     | 36.996                                     | -0.645223              | 0.196015               |
| H125 | 2020-01b | ETH-2        | 4.04         | 1.00                                             | -6.341105     | -14.448492    | -21.295312    | -28.682344    | -1.053444     | -10.179                                   | 19.875                                     | -0.653633              | 0.191046               |
| H126 | 2020-01b | ARD_05_am    | 4.00         | 0.95                                             | 4.039565      | 3.500412      | 7.316778      | 6.872302      | -0.667387     | 0.382                                     | 38.812                                     | -0.304540              | 0.598609               |
| H127 | 2020-01b | POLO_35a_D   | 4.07         | 0.94                                             | 7.057358      | 2.229746      | 9.196702      | 4.246810      | -0.551950     | 3.697                                     | 37.463                                     | -0.290354              | 0.615044               |
| H128 | 2020-01b | ETH-3        | 4.00         | 0.98                                             | 5.221772      | 2.246988      | 7.314135      | 4.471748      | -0.262135     | 1.709                                     | 37.486                                     | -0.292393              | 0.612967               |
| H129 | 2020-01b | ETH-2        | 4.02         | 1.00                                             | -6.336450     | -14.434852    | -21.266718    | -28.747364    | -0.808774     | -10.174                                   | 19.891                                     | -0.642864              | 0.203770               |
| H130 | 2020-01b | ETH-3        | 3.97         | 0.98                                             | 5.214868      | 2.165290      | 7.224908      | 4.206955      | -0.112020     | 1.705                                     | 37.401                                     | -0.293742              | 0.611388               |
| H131 | 2020-02a | ETH-1        | 4.08         | 1.00                                             | 5.491910      | 1.912792      | 6.911807      | 3.573034      | -0.405747     | 2.017                                     | 36.982                                     | -0.641014              | 0.194370               |
| H132 | 2020-02a | ETH-3        | 4.04         | 0.98                                             | 5.231073      | 2.341840      | 7.422754      | 4.528560      | -0.001345     | 1.719                                     | 37.445                                     | -0.287158              | 0.612848               |
| H133 | 2020-02a | ETH-2        | 3.96         | 1.01                                             | -6.326737     | -14.309524    | -21.125944    | -28.465904    | -1.159931     | -10.170                                   | 19.878                                     | -0.634142              | 0.208218               |
| H134 | 2020-02a | ETH-3        | 3.97         | 0.98                                             | 5.230422      | 2.331273      | 7.419776      | 4.601370      | -0.129628     | 1.718                                     | 37.458                                     | -0.279082              | 0.622403               |
| H135 | 2020-02a | Tcub_2_v     | 3.86         | 0.96                                             | 5.357763      | 5.145657      | 10.341794     | 10.106267     | -0.680537     | 1.751                                     | 40.445                                     | -0.270182              | 0.632334               |
| H136 | 2020-02a | Tgal_3_v     | 3.96         | 0.98                                             | 5.593548      | 5.312546      | 10.742659     | 10.488659     | 0.618243      | 2.000                                     | 40.630                                     | -0.278650              | 0.622236               |
| H137 | 2020-02a | Tpli_2_v     | 3.84         | 0.99                                             | 6.272760      | 4.238470      | 10.367643     | 8.395109      | -0.254011     | 2.776                                     | 39.501                                     | -0.295339              | 0.602571               |
| H138 | 2020-02a | ETH-3        | 4.11         | 0.98                                             | 5.236538      | 2.342101      | 7.429351      | 4.609546      | -0.154805     | 1.725                                     | 37.508                                     | -0.286472              | 0.613659               |
| H139 | 2020-02a | ETH-1        | 3.87         | 1.00                                             | 5.487019      | 1.867266      | 6.872710      | 3.599184      | -0.324665     | 2.014                                     | 37.013                                     | -0.630157              | 0.207221               |
| H140 | 2020-02a | ETH-2        | 4.02         | 1.01                                             | -6.317083     | -14.326630    | -21.138945    | -28.525493    | -0.828736     | -10.159                                   | 19.922                                     | -0.640381              | 0.200840               |
| H141 | 2020-02a | ARD_01       | 4.09         | 0.88                                             | 6.246021      | 2.323729      | 8.431707      | 4.449026      | -0.350992     | 2.819                                     | 37.503                                     | -0.309425              | 0.586302               |
| H142 | 2020-02a | ARD_03       | 4.11         | 1.00                                             | 5.884421      | 1.495868      | 7.248620      | 2.897229      | 0.055494      | 2.458                                     | 36.633                                     | -0.300133              | 0.597536               |
| H143 | 2020-02a | ARD_04_biv   | 4.00         | 0.98                                             | 5.929738      | 1.698720      | 7.487215      | 3.249716      | -0.429008     | 2.500                                     | 36.851                                     | -0.308880              | 0.587140               |
| H144 | 2020-02a | ETH-3        | 4.05         | 0.96                                             | 5.223573      | 2.267517      | 7.344336      | 4.401775      | -0.166645     | 1.713                                     | 37.457                                     | -0.284399              | 0.616129               |
| H145 | 2020-02a | POLO_13_D    | 4.05         | 0.88                                             | 8.069417      | 1.194117      | 9.241841      | 2.209444      | -0.374694     | 4.836                                     | 36.319                                     | -0.265238              | 0.638407               |
| H146 | 2020-02a | POLO_33_D    | 4.11         | 0.80                                             | 7.513551      | 1.709762      | 9.163864      | 3.252346      | -0.791192     | 4.214                                     | 36.868                                     | -0.279817              | 0.621177               |
| H147 | 2020-02a | ETH-1        | 3.88         | 1.00                                             | 5.489263      | 1.841241      | 6.852848      | 3.400449      | -0.226788     | 2.017                                     | 37.016                                     | -0.626646              | 0.211378               |
| H148 | 2020-02a | POLO_21_D    | 3.99         | 0.93                                             | 8.357241      | 1.873116      | 10.186637     | 3.720746      | -0.134838     | 5.122                                     | 37.045                                     | -0.290602              | 0.608211               |
| H149 | 2020-02a | POLO_sb_D    | 4.02         | 0.90                                             | 7.501074      | 1.709057      | 9.143208      | 3.416463      | -0.304859     | 4.201                                     | 36.875                                     | -0.286816              | 0.612902               |
| H150 | 2020-02a | ARD_04_biv   | 4.14         | 1.00                                             | 6.288695      | 1.685220      | 7.835238      | 3.355182      | 0.106878      | 2.889                                     | 36.854                                     | -0.318297              | 0.575930               |
| H151 | 2020-02a | ETH-3        | 4.02         | 0.96                                             |               |               |               |               |               |                                           |                                            |                        |                        |

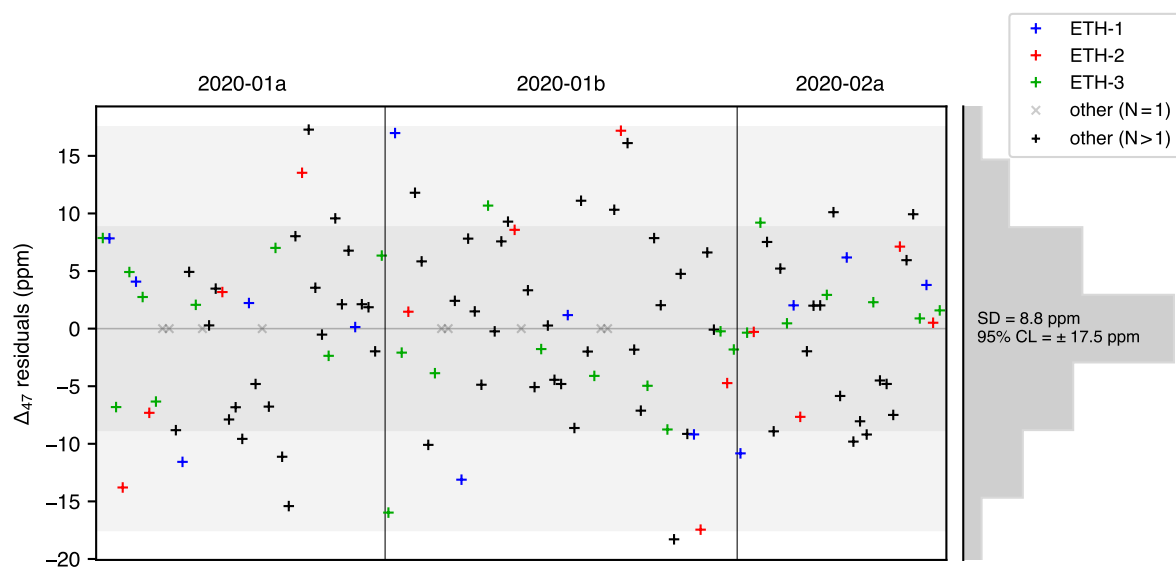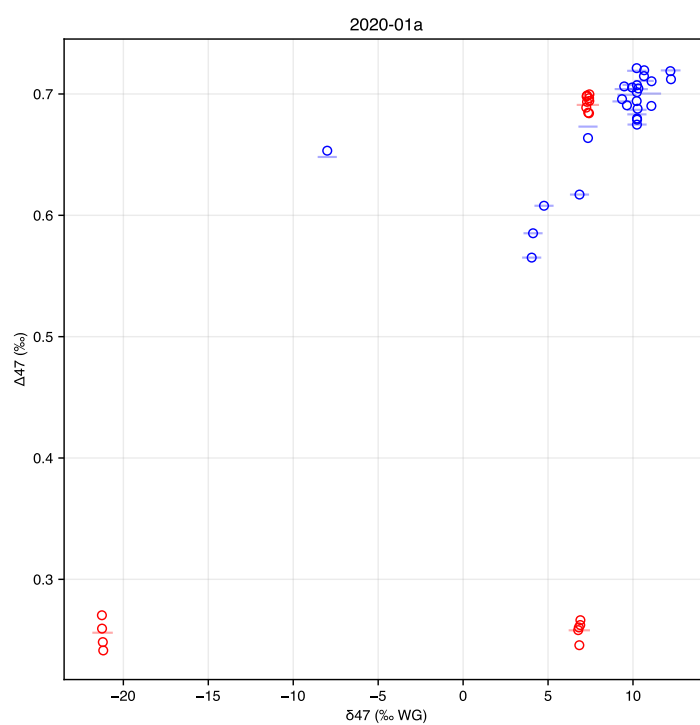



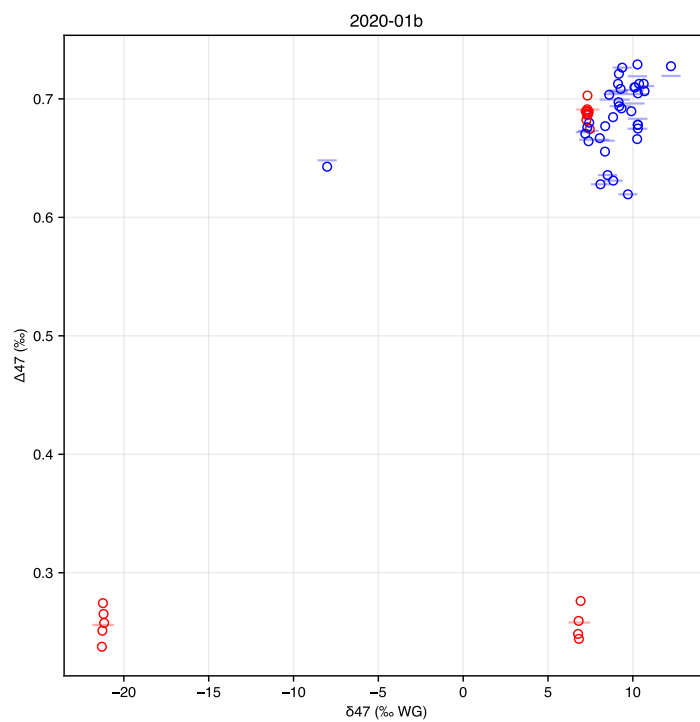

Supplement: Supplementary file 1 [file S4 D47report_Letulle_2020_01.pdf › Supplementary/S4 D47report_Letulle_2020_01.pdf]
