# Supplementary material for: Multi-proxy assessment of brachiopod shell calcite as a potential archive of seawater temperature and oxygen isotope composition
Source: Copernicus journal article supplement (doi:10.5194/bg-20-1381-2023), 2023-04-12
Supplement: Supplementary file 1 [file S1 Data table.xlsx]

## Sheet: Table description
Columns	Description
A	Specimen ID
B	Latitude of the specimen collecting site
C	Longitude of the specimen collecting site
D	Depth of the specimen collecting site
E	Taxonomic group: Suborder
F	Valve sampled for geochemical analyses
G	Part of the shell sampled for geochemical analyses (antero-posterior position)
H	Sampled shell layer for geochemical analyses
I	Mean annual temperature at collecting site
J	Temperature seasonal variability at the collecting site. Mean difference between the highest/lowest mean monthly temperature and the mean annual temperature. For samples with significant depth range, temperature variation within depth range is also considered.
K	Mean annual salinity at collecting site
L	Salinity seasonal variability at the collecting site. Mean difference between the highest/lowest mean monthly salinity and the mean annual salinity. For samples with significant depth range, salinity variation within the depth range is also considered.
M	Estimated d18Osw values in (‰VSMOW) using the regional salinity-d18Osw relationship according to LeGrande et Schmidt (2006)
N	Uncertainty associated with estimated d18Osw values (‰VSMOW)
O	Oceanographic region considered to estimate d18Osw values
P	Brachiopod shell sample d13C value in ‰VPDB
Q	Analytic 95% confidence interval on the brachiopod shell sample d13C value in ‰VPDB
R	Brachiopod shell sample d18O value in ‰VPDB
S	Analytic 95% confidence interval on the brachiopod shell sample d18O value in ‰VPDB
T	Brachiopod shell sample D47 value in ‰I-CDES
U	Analytic 95% confidence interval on the brachiopod shell sample D47 value in ‰I-CDES
V	Laboratory where the isotopic values were acquired
W	Oxygen isotope fractionation between seawater and brachiopod shell sample (W = Q - M + 0.28) in ‰
X	Propagated error associated with the oxygen isotope fractionation between seawater and brachiopod shell sample (X = S + N)
Y	D47 temperature calculated using the equation of Anderson et al. (2021)
Z	95% confidence interval on D47 temperature calculated using the equation of Anderson et al. (2021)
AA	Expected equilibrium d18Oc value in ‰VPDB by resolving Daëron et al. (2019) equation for very slow growing calcite using environmental parameters (Sampling site temperatures and d18Osw values)
AB	Propagated uncertainties for expected equilibrium d18Oc value in ‰VPDB by resolving Daëron et al. (2019) equation for very slow growing calcite using environmental parameters (Sampling site temperatures and d18Osw values, and their respective uncertainties)
AC	Brachiopod shell sample d18Oc offset from equilibrium in ‰VPDB (AC = R - AA)
AD	Propagated uncertainties for brachiopod shell sample d18Oc offset from equilibrium in ‰VPDB (AD = S + AB)
AE	Expected equilibrium D47 value in ‰I-CDES by resolving Anderson et al. (2021) equation, which closely fit very slow growing calcite, using environmental parameters (Sampling site temperatures)
AF	Propagated uncertainties for expected equilibrium D47 value in ‰I-CDES by resolving Anderson et al. (2021) equation, which closely fit very slow growing calcite, using environmental parameters (Sampling site temperatures and its uncertainty)
AG	Brachiopod shell sample D47 offset from equilibrium in ‰VPDB (AG = T - AE)
AH	Propagated uncertainties for brachiopod shell sample D47 offset from equilibrium in ‰VPDB (AH = U + AF)
AI	Mg/Ca molar ratio of the brachiopod shell sample in mmol/mol
AJ	Sr/Ca molar ratio of the brachiopod shell sample in mmol/mol
AK	Li/Ca molar ratio of the brachiopod shell sample in µmol/mol
AL	Na/Ca molar ratio of the brachiopod shell sample in mmol/mol
References	Daëron, M., Drysdale, R. N., Peral, M., Huyghe, D., Blamart, D., Coplen, T. B., Lartaud, F., and Zanchetta, G.: Most Earth-surface calcites precipitate out of isotopic equilibrium, Nat. Commun., 10, 429, https://doi.org/10.1038/s41467-019-08336-5, 2019.
	Anderson, N. T., Kelson, J. R., Kele, S., Daëron, M., Bonifacie, M., Horita, J., Mackey, T. J., John, C. M., Kluge, T., Petschnig, P., Jost, A. B., Huntington, K. W., Bernasconi, S. M., and Bergmann, K. D.: A Unified Clumped Isotope Thermometer Calibration (0.5–1,100°C) Using Carbonate‐Based Standardization, Geophys. Res. Lett., 48, https://doi.org/10.1029/2020GL092069, 2021.

## Sheet: Data table
Specimen	Latitude	Longitude	Depth (m)	Suborder	Valve	Shell_area	Shell_layer	MAT (°C)	T-var (°C)	Salinity	S-Var	d18Osw_L.S (‰VSMOW)	d18Osw_L.S_E (‰VSMOW)	Region	d13C (‰VPDB)	d13C_CI (‰VPDB)	d18O (‰VPDB)	d18O_CI (‰VPDB)	D47 (‰ICDES)	D47_CI	iso_lab	D18O2	D18OCI2	T_47	T_47_CI	d18Oc eq	d18Oc eq SD	d18O eq offset	d18O eq offset SD	D47 eq	D47 eq SD	D47 offset eq	D47 offset eqSD	MgCa (mmol/mol)	SrCa (mmol/mol)	LiCa (µmol/mol)	NaCa (mmol/mol)
TPLI-2	16.35	-60.9	136.5	Terebratulidina	Pedical	Middle	Inner	23.5	3	36.87	0.12	0.9205	0.131	Tropical Atlantic	2.75	0.01	0.14	0.01	0.5974	0.0094	LSCE	-0.5005	0.141	23.8049	3.1477	0.566676	0.724008	-0.426676	0.734008	0.598312	0.00885208	-0.000912009	0.0182521
TPLI-5	16.35	-60.9	136.5	Terebratulidina	Brachial	Middle	Inner	23.5	3	36.87	0.12	0.9205	0.131	Tropical Atlantic	2.955	0.05	0.449	0.1			LGLTPE	-0.1915	0.231			0.566676	0.724008	-0.117676	0.824008					9.81666	0.630447	5.28615	3.09713
TDES-G1	16.35	-60.9	136.5	Terebratulidina	Pedical	Middle	Inner	23.5	3	36.87	0.12	0.9205	0.131	Tropical Atlantic	2.68	0.01	0.18	0.02	0.6049	0.0095	LSCE	-0.4605	0.151	21.3249	3.10214	0.566676	0.724008	-0.386676	0.744008	0.598312	0.00885208	0.00658799	0.0183521
TDES-G3	16.35	-60.9	136.5	Terebratulidina	Brachial	Middle	Inner	23.5	3	36.87	0.12	0.9205	0.131	Tropical Atlantic	2.756	0.05	0.313	0.1			LGLTPE	-0.3275	0.231			0.566676	0.724008	-0.253676	0.824008
TDES-G3	16.35	-60.9	136.5	Terebratulidina	Pedical	Middle	Inner	23.5	3	36.87	0.12	0.9205	0.131	Tropical Atlantic	2.612	0.05	0.234	0.1			LGLTPE	-0.4065	0.231			0.566676	0.724008	-0.332676	0.824008					3.81566	0.559449	3.28446	2.47953
TDES-B2	16.35	-60.9	136.5	Terebratulidina	Pedical	Middle	Inner	23.5	3	36.87	0.12	0.9205	0.131	Tropical Atlantic	2.58	0.01	0.26	0.02	0.6086	0.0131	LSCE	-0.3805	0.151	20.1241	4.22557	0.566676	0.724008	-0.306676	0.744008	0.598312	0.00885208	0.010288	0.0219521
TDES-B4	16.35	-60.9	136.5	Terebratulidina	Pedical	Middle	Inner	23.5	3	36.87	0.12	0.9205	0.131	Tropical Atlantic	2.56	0.05	0.361	0.1			LGLTPE	-0.2795	0.231			0.566676	0.724008	-0.205676	0.824008
TDES-B4	16.35	-60.9	136.5	Terebratulidina	Brachial	Middle	Inner	23.5	3	36.87	0.12	0.9205	0.131	Tropical Atlantic	2.714	0.05	0.467	0.1			LGLTPE	-0.1735	0.231			0.566676	0.724008	-0.0996762	0.824008					6.96223	0.583863	4.63563	2.80214
SGLO-S1	-19.1	163.5	220	Terebratulidina	Pedical	Middle	Inner	19.7	0.7	35.61	0.01	0.7347	0.078	Tropical Pacific	3.063	0.05	0.44	0.1			LGLTPE	-0.0147	0.178			1.15007	0.221243	-0.710069	0.321243					6.67645	0.601777	5.21036	2.84935
TCUB-3	16.33	-60.98	250	Terebratulidina	Pedical	Middle	Inner	17.3	1.2	36.38	0.03	0.847	0.131	Tropical Atlantic	2.313	0.05	1.242	0.1			LGLTPE	0.675	0.231			1.75892	0.38039	-0.516919	0.48039					4.86959	0.499329	3.85802	1.98175
TCUB-3	16.33	-60.98	250	Terebratulidina	Brachial	Middle	Inner	17.3	1.2	36.38	0.03	0.847	0.131	Tropical Atlantic	2.248	0.05	1.25	0.1			LGLTPE	0.683	0.231			1.75892	0.38039	-0.508919	0.48039
SGLO-M1	-18.98	163.4	320	Terebratulidina	Pedical	Middle	Inner	16.4	0.7	35.4	0.02	0.678	0.078	Tropical Pacific	2.873	0.05	1.102	0.1			LGLTPE	0.704	0.178			1.77811	0.224668	-0.676108	0.324668					6.69729	0.550406	6.00643	2.87491
SGLO-M1	-18.98	163.4	320	Terebratulidina	Brachial	Middle	Inner	16.4	0.7	35.4	0.02	0.678	0.078	Tropical Pacific	2.991	0.05	1.121	0.1			LGLTPE	0.723	0.178			1.77811	0.224668	-0.657108	0.324668
SGLO-M2	-18.98	163.4	320	Terebratulidina	Pedical	Middle	Inner	16.4	0.7	35.4	0.02	0.678	0.078	Tropical Pacific	2.8	0.01	0.88	0.02	0.621	0.0131	LSCE	0.482	0.098	16.2043	4.0584	1.77811	0.224668	-0.898108	0.244668	0.620369	0.00224678	0.00063106	0.0153468
TGAL-4	15.8833	-61.4167	264	Terebratulidina	Pedical	Middle	Inner	16.6	1	36.22	0.04	0.823	0.131	Tropical Atlantic	2.673	0.05	1.273	0.1			LGLTPE	0.73	0.231			1.8813	0.340041	-0.608303	0.440041					6.87198	0.527627	3.89307	2.40485
TGAL-4	15.8833	-61.4167	264	Terebratulidina	Pedical	Middle	Inner	16.6	1	36.22	0.04	0.823	0.131	Tropical Atlantic	2.75	0.03	1.44	0.03	0.6113	0.0069	LSCE	0.897	0.161	19.257	2.206	1.8813	0.340041	-0.441303	0.370041	0.619725	0.0031981	-0.00842534	0.0100981	6.87198	0.527627	3.89307	2.40485
WB9A	-43.5742	172.669	20	Terebratellidina	Pedical	Middle	Inner	14	4	33.4	0.9	-0.26	0.08	South Pacific	2.35	0.05	0.854	0.1			LGLTPE	1.394	0.18			1.3468	0.921472	-0.492798	1.02147					5.73268	1.03741	34.3837	9.75236
WB5	-45.3477	167.048	17.5	Terebratellidina	Pedical	Middle	Inner	13.6	2.3	34.7		0.325	0.08	South Pacific	0.52	0.02	0.47	0.03	0.6639	0.0086	LSCE	0.425	0.11	3.76461	2.33523	2.01826	0.568516	-1.54826	0.598516	0.629521	0.00753743	0.0343788	0.0161374	4.27902	1.13224	38.3853	10.0965
WB6	-45.325	166.99	25	Terebratulidina	Pedical	Middle	Inner	13.2	2.5	34.7		0.325	0.08	South Pacific	2.91	0.02	1.55	0.03	0.6295	0.0086	LSCE	1.505	0.11	13.6064	2.59317	2.10403	0.612134	-0.554027	0.642134	0.630851	0.00821858	-0.00135065	0.0168186	11.1442	0.820918	15.915	6.24528
WB8	-45.36	170.84	20	Rhynchonellida	Pedical	Middle	Inner	10.4	2	34.34	0.06	0.163	0.08	South Pacific	2.1	0.02	1.25	0.03	0.65	0.0086	LSCE	1.367	0.11	7.61796	2.43408	2.549	0.515168	-1.299	0.545168	0.640315	0.00678847	0.00968524	0.0153885	11.4766	1.24413	46.6768	12.6889
SCRO-1	-22.98	167.32	525	Terebratulidina	Pedical	Middle	Inner	10	0.9	34.76	0.01	0.5052	0.078	Tropical Pacific	2.72	0.01	2.04	0.02	0.6387	0.0109	LSCE	1.8148	0.098	10.8719	3.19356	2.97981	0.275353	-0.939812	0.295353	0.64169	0.00308555	-0.00298975	0.0139856
SCRO-3	-22.98	167.32	525	Terebratulidina	Pedical	Middle	Inner	10	0.9	34.76	0.01	0.5052	0.078	Tropical Pacific	3.167	0.05	2.127	0.1			LGLTPE	1.9018	0.178			2.97981	0.275353	-0.852812	0.375353					3.76323	0.448972	4.0871	1.85909
MCRA-SKA	63.8667	11.0667	70	Terebratellidina	Pedical	Middle	Inner	7	1	33.5	0.5	-0.555	0.193	North Atlantic	0.237311	0.05	1.27766	0.1			LGLTPE	2.11266	0.293			2.58297	0.417185	-1.30531	0.517185					7.28124	1.24214	53.1449	13.3092
AKER-79	-45.8567	50.7333	140	Terebratellidina	Pedical	Middle	Inner	4.2	0.6	33.899	0.01	-0.31424	0.132	Southern Ocean	0.544044	0.05	1.33069	0.1			LGLTPE	1.92493	0.232			3.45963	0.269694	-2.12894	0.369694
AKER-61	-46.4667	51.8867	105	Terebratellidina	Pedical	Middle	Inner	4.1	1.2	33.848	0.01	-0.32648	0.132	Southern Ocean	1.47762	0.05	2.0869	0.1			LGLTPE	2.69338	0.232			3.47027	0.406483	-1.38337	0.506483					4.93824	1.05842	48.8024	10.9191
AKER-61	-46.4667	51.8867	105	Terebratellidina	Pedical	Middle	Inner	4.1	1.2	33.848	0.01	-0.32648	0.132	Southern Ocean	1.36	0.02	2.26	0.03	0.6869	0.0101	LSCE	2.86648	0.162	-2.27712	2.56691	3.47027	0.406483	-1.21027	0.436483	0.662667	0.00437483	0.0242329	0.0144748	4.93824	1.05842	48.8024	10.9191
WB4A	-45.96	50.0567	200	Terebratellidina	Pedical	Middle	Inner	3.87	0.6	33.971	0.02	-0.29696	0.132	Southern Ocean	2.5	0.02	2.96	0.03	0.6664	0.0071	LSCE	3.53696	0.162	3.08825	1.91383	3.55271	0.270044	-0.592708	0.300044	0.663512	0.00219996	0.00288789	0.00929996	5.12558	0.996218	41.0963	9.10924
WB4B	-46.1	50.6383	221	Terebratellidina	Brachial	Middle	Inner	3.67	0.6	34.005	0.03	-0.2888	0.132	Southern Ocean	1.86	0.02	2.79	0.03	0.6752	0.0071	LSCE	3.3588	0.162	0.746306	1.86556	3.60689	0.270256	-0.816888	0.300256	0.664249	0.00220473	0.0109514	0.00930473	5.08372	1.01378	40.8038	9.53435
AKER-73	-46.475	50.5833	211	Terebratellidina	Pedical	Middle	Inner	3.31	0.8	34	0.02	-0.29	0.132	Southern Ocean	1.96647	0.05	2.34846	0.1			LGLTPE	2.91846	0.232			3.68863	0.316536	-1.34017	0.416536					6.79523	1.08266	46.4127	10.3335
AKER-68	-46.5483	51.7833	200	Terebratellidina	Pedical	Middle	Inner	3.38	0.8	33.988	0.02	-0.29288	0.132	Southern Ocean	1.57	0.02	2.57	0.03	0.6811	0.0071	LSCE	3.14288	0.162	-0.790912	1.83433	3.6696	0.316438	-1.0996	0.346438	0.665319	0.0029457	0.0157806	0.0100457	4.92093	1.05992	46.7074	10.1738
AKER-68	-46.5483	51.7833	200	Terebratellidina	Pedical	Middle	Inner	3.38	0.8	33.988	0.02	-0.29288	0.132	Southern Ocean	1.22752	0.05	2.02435	0.1			LGLTPE	2.59723	0.232			3.6696	0.316438	-1.64525	0.416438					4.92093	1.05992	46.7074	10.1738
AKER-12	-46.1233	50.7717	297.5	Terebratellidina	Pedical	Middle	Inner	3.22	0.2	34.113	0.01	-0.26288	0.132	Southern Ocean	1.92014	0.05	2.50833	0.1			LGLTPE	3.05121	0.232			3.73664	0.178666	-1.2283	0.278666					3.92334	0.888349	38.6816	8.34532
AKER-66	-46.6667	51.675	325	Terebratellidina	Pedical	Middle	Inner	2.8	0.6	34.161	0.01	-0.25136	0.132	Southern Ocean	2.4615	0.05	2.73443	0.1			LGLTPE	3.26579	0.232			3.84533	0.271184	-1.1109	0.371184					3.57242	0.604159	16.2733	3.90778
AKER-52	-45.8017	49.7625	355	Terebratellidina	Pedical	Middle	Inner	3.14	0.3	34.158	0.01	-0.25208	0.132	Southern Ocean	2.03	0.02	3.37	0.03	0.667	0.0087	LSCE	3.90208	0.162	2.92666	2.341	3.76596	0.201754	-0.395956	0.231754	0.666208	0.00111052	0.000791921	0.00981052	7.46782	0.94253	44.7046	9.46072
AKER-52	-45.8017	49.7625	355	Terebratellidina	Pedical	Middle	Inner	3.14	0.3	34.158	0.01	-0.25208	0.132	Southern Ocean	2.04237	0.05	3.227	0.1			LGLTPE	3.75908	0.232			3.76596	0.201754	-0.538954	0.301754					7.46782	0.94253	44.7046	9.46072
LUVA-PAL	-67.57	-68.14	20	Terebratulidina	Pedical	Middle	Inner	-1.1	0.4	33.3	0.2	-0.451	0.132	Southern Ocean	0.531351	0.05	2.90794	0.1			LGLTPE	3.63894	0.232			4.56138	0.227897	-1.65344	0.327897					13.4657	1.56095	54.821	14.8492
LUVA-PAL	-67.57	-68.14	20	Terebratulidina	Pedical	Middle	Inner	-1.1	0.4	33.3	0.2	-0.451	0.132	Southern Ocean	0.63	0.02	3.33	0.03	0.6941	0.0087	LSCE	4.061	0.162	-4.08867	2.16704	4.56138	0.227897	-1.23138	0.257897	0.682298	0.00155011	0.0118016	0.0102501	13.4657	1.56095	54.821	14.8492
MFRA-CEA	-66.6333	143.083	868.5	Terebratellidina	Pedical	Middle	Inner	-1.9	0.2	34.7		-0.129	0.075	AABW	1.02642	0.05	3.67868	0.1			LGLTPE	4.08768	0.175			5.07642	0.123353	-1.39774	0.223353					6.83672	1.13188	55.3459	11.4342
MFRA-CEA	-66.6333	143.083	868.5	Terebratellidina	Pedical	Middle	Inner	-1.9	0.2	34.7		-0.129	0.075	AABW	1.01	0.02	3.98	0.03	0.6921	0.0078	LSCE	4.389	0.105	-3.58911	1.9537	5.07642	0.123353	-1.09642	0.153353	0.685419	0.000782794	0.00668077	0.00858279	6.83672	1.13188	55.3459	11.4342
SGLO-S1	-19.1	163.5	220	Terebratulidina	Pedical	Middle	Outer	19.7	0.7	35.61	0.01	0.7347	0.078	Tropical Pacific	2.041	0.05	0.199	0.1			LGLTPE	-0.2557	0.178			1.15007	0.221243	-0.951069	0.321243					11.1473	1.01705	25.5343	8.34568
TCUB-3	16.33	-60.98	250	Terebratulidina	Pedical	Middle	Outer	17.3	1	36.38	0.03	0.847	0.131	Tropical Atlantic	1.45	0.05	0.981	0.1			LGLTPE	0.414	0.231			1.75892	0.338992	-0.777919	0.438992					8.25292	0.845256	18.7661	6.80931
SGLO-M1	-18.98	163.4	320	Terebratulidina	Brachial	Middle	Outer	16.4	0.7	35.4	0.02	0.678	0.078	Tropical Pacific	1.98	0.05	0.909	0.1			LGLTPE	0.511	0.178			1.77811	0.224668	-0.869108	0.324668					10.7153	0.9445	26.9149	8.24896
SGLO-M2	-18.98	163.4	320	Terebratulidina	Pedical	Middle	Outer	16.4	0.7	35.4	0.02	0.678	0.078	Tropical Pacific	1.87	0.01	0.91	0.02	0.6388	0.0109	LSCE	0.512	0.098	10.8426	3.19257	1.77811	0.224668	-0.868108	0.244668	0.620369	0.00224678	0.0184311	0.0131468
TGAL-4	15.8833	-61.4167	264	Terebratulidina	Pedical	Middle	Outer	16.6	1	36.22	0.04	0.823	0.131	Tropical Atlantic	1.457	0.05	1.081	0.1			LGLTPE	0.538	0.231			1.8813	0.340041	-0.800303	0.440041					15.5557	1.11899	30.0398	10.0674
WB9A	-43.5742	172.669	20	Terebratellidina	Pedical	Middle	Outer	14	4	33.4	0.9	-0.26	0.08	South Pacific	0.431	0.05	-0.529	0.1			LGLTPE	0.011	0.18			1.3468	0.921472	-1.8758	1.02147
WB5	-45.3477	167.048	17.5	Terebratellidina	Pedical	Middle	Outer	13.6	2.3	34.7		0.325	0.08	South Pacific	-1.537	0.05	-0.631	0.1			LGLTPE	-0.676	0.18			2.01826	0.568516	-2.64926	0.668516					6.69433	1.4622	40.8407	13.2476
WB6	-45.325	166.99	25	Terebratulidina	Pedical	Middle	Outer	13.2	2.5	34.7		0.325	0.08	South Pacific	1.929	0.05	1.047	0.1			LGLTPE	1.002	0.18			2.10403	0.612134	-1.05703	0.712134					12.5028	1.42833	35.0652	12.7791
SCRO-3	-22.98	167.32	525	Terebratulidina	Pedical	Middle	Outer	10	0.9	34.76	0.01	0.5052	0.078	Tropical Pacific	2.335	0.05	2.028	0.1			LGLTPE	1.8028	0.178			2.97981	0.275353	-0.951812	0.375353					13.2086	1.06855	28.8995	10.4615
MCRA-SKA	63.8667	11.0667	70	Terebratellidina	Pedical	Middle	Outer	7	1	33.5	0.5	-0.555	0.193	North Atlantic	-1.31627	0.05	0.539846	0.1			LGLTPE	1.37485	0.293			2.58297	0.417185	-2.04312	0.517185
AKER-79	-45.8567	50.7333	140	Terebratellidina	Pedical	Middle	Outer	4.2	0.6	33.899	0.01	-0.31424	0.132	Southern Ocean	-1.08414	0.05	1.154	0.1			LGLTPE	1.74824	0.232			3.45963	0.269694	-2.30563	0.369694					6.57068	1.33183	49.6721	12.9952
AKER-61	-46.4667	51.8867	105	Terebratellidina	Pedical	Middle	Outer	4	0.6	33.848	0.01	-0.32648	0.132	Southern Ocean	-2.23802	0.05	0.310677	0.1			LGLTPE	0.917157	0.232			3.49322	0.269903	-3.18254	0.369903					6.09081	1.54556	58.4746	15.1838
WB4A	-45.96	50.0567	200	Terebratellidina	Pedical	Middle	Outer	3.87	0.6	33.971	0.02	-0.29696	0.132	Southern Ocean	1.106	0.05	2.042	0.1			LGLTPE	2.61896	0.232			3.55271	0.270044	-1.51071	0.370044					5.59193	1.17943	49.3338	11.5023
WB4B	-46.1	50.6383	221	Terebratellidina	Brachial	Middle	Outer	3.67	0.6	34.005	0.03	-0.2888	0.132	Southern Ocean	1.127	0.05	2.215	0.1			LGLTPE	2.7838	0.232			3.60689	0.270256	-1.39189	0.370256					5.56918	1.20486	51.4137	11.6649
AKER-73	-46.475	50.5833	211	Terebratellidina	Pedical	Middle	Outer	3.31	0.8	34	0.02	-0.29	0.132	Southern Ocean	0.576615	0.05	1.96243	0.1			LGLTPE	2.53243	0.232			3.68863	0.316536	-1.7262	0.416536					9.74742	1.25575	46.6308	11.7697
AKER-68	-46.5483	51.7833	200	Terebratellidina	Pedical	Middle	Outer	3.38	0.8	33.988	0.02	-0.29288	0.132	Southern Ocean	-1.06417	0.05	1.34277	0.1			LGLTPE	1.91565	0.232			3.6696	0.316438	-2.32683	0.416438					5.53323	1.37026	51.7269	12.7876
AKER-12	-46.1233	50.7717	297.5	Terebratellidina	Pedical	Middle	Outer	3.22	0.2	34.113	0.01	-0.26288	0.132	Southern Ocean	0.884087	0.05	2.5704	0.1			LGLTPE	3.11328	0.232			3.73664	0.178666	-1.16624	0.278666					7.46069	1.24927	51.6488	13.036
AKER-66	-46.6667	51.675	325	Terebratellidina	Pedical	Middle	Outer	2.8	0.6	34.161	0.01	-0.25136	0.132	Southern Ocean	2.26858	0.05	3.1849	0.1			LGLTPE	3.71626	0.232			3.84533	0.271184	-0.660428	0.371184					9.94179	1.37111	48.0065	12.2885
AKER-52	-45.8017	49.7625	355	Terebratellidina	Pedical	Middle	Outer	3.14	0.3	34.158	0.01	-0.25208	0.132	Southern Ocean	1.39309	0.05	2.78209	0.1			LGLTPE	3.31417	0.232			3.76596	0.201754	-0.983871	0.301754					8.45928	1.18324	48.7913	12.3035
LUVA-PAL	-67.57	-68.14	20	Terebratulidina	Pedical	Middle	Outer	-1.1	0.4	33.3	0.2	-0.451	0.075	AABW	-1.68579	0.05	1.86934	0.1			LGLTPE	2.60034	0.175			4.56138	0.170616	-2.69204	0.270616					20.1731	2.05343	56.0199	18.2758
MFRA-CEA	-66.6333	143.083	868.5	Terebratellidina	Pedical	Middle	Outer	-1.9	0.2	34.7		-0.129	0.075	AABW	-0.462366	0.05	2.73148	0.1			LGLTPE	3.14048	0.175			5.07642	0.123353	-2.34494	0.223353					5.3925	1.368	56.7471	15.4773
FSAN-3	-20.87	167.13	10	Terebratellidina	Brachial	Anterior	Bulk	25.4	1.8	35.18	0.1	0.6186	0.078	Tropical Pacific	1.472	0.05	-1.197	0.1			LGLTPE	-1.5356	0.178			-0.112079	0.430509	-1.08492	0.530509
FSAN-3	-20.87	167.13	10	Terebratellidina	Pedical	Anterior	Bulk	25.4	1.8	35.18	0.1	0.6186	0.078	Tropical Pacific	1.422	0.05	-1.224	0.1			LGLTPE	-1.5626	0.178			-0.112079	0.430509	-1.11192	0.530509					14.6522	1.08018	22.448	9.09112
TLAT-5	16.35	-60.9	136.5	Terebratulidina	Brachial	Anterior	Bulk	23.5	3	36.87	0.12	0.9205	0.131	Tropical Atlantic	1.073	0.05	0.187	0.1			LGLTPE	-0.4535	0.231			0.566676	0.724008	-0.379676	0.824008
TLAT-5	16.35	-60.9	136.5	Terebratulidina	Pedical	Anterior	Bulk	23.5	3	36.87	0.12	0.9205	0.131	Tropical Atlantic	1.036	0.05	0.21	0.1			LGLTPE	-0.4305	0.231			0.566676	0.724008	-0.356676	0.824008					25.2966	1.22365	28.5957	12.4213
TCUB-2	16.33	-60.98	250	Terebratulidina	Pedical	Middle	Bulk	17.3	1	36.38	0.03	0.847	0.131	Tropical Atlantic	1.75	0.01	1.08	0.02	0.6248	0.0086	LSCE	0.513	0.151	15.0342	2.6321	1.75892	0.338992	-0.678919	0.358992	0.617483	0.00317508	0.0073168	0.0117751
TGAL-3	15.8833	-61.4167	264	Terebratulidina	Pedical	Middle	Bulk	16.2	0.2	36.22	0.04	0.823	0.131	Tropical Atlantic	1.97	0.05	1.22	0.1	0.6312	0.0086	LSCE	0.677	0.231	13.0952	2.57933	1.96529	0.173168	-0.745291	0.273168	0.621014	0.000644935	0.0101861	0.00924494
FNEO-N4	-22.9	167.22	416	Terebratellidina	Brachial	Middle	Bulk	13.4	1.2	35.11	0.05	0.5997	0.078	Tropical Pacific	1.865	0.05	1.294	0.1			LGLTPE	0.9743	0.178			2.33629	0.334384	-1.04229	0.434384
FNEO-N4	-22.9	167.22	416	Terebratellidina	Pedical	Middle	Bulk	13.4	1.2	35.11	0.05	0.5997	0.078	Tropical Pacific	1.925	0.05	1.323	0.1			LGLTPE	1.0033	0.178			2.33629	0.334384	-1.01329	0.434384					13.3457	1.0554	30.2137	10.1561
FNEO-M2	-18.77	163.27	600	Terebratellidina	Brachial	Anterior	Bulk	7.72	0.6	34.58	0.03	0.4566	0.078	Tropical Pacific	1.925	0.05	2.061	0.1			LGLTPE	1.8844	0.178			3.43641	0.212019	-1.37541	0.312019
FNEO-M2	-18.77	163.27	600	Terebratellidina	Pedical	Anterior	Bulk	7.72	0.6	34.58	0.03	0.4566	0.078	Tropical Pacific	1.97	0.05	2.049	0.1			LGLTPE	1.8724	0.178			3.43641	0.212019	-1.38741	0.312019					24.8974	1.35944	33.4705	14.2075
MAF-5	-12.4067	11.045	3431	Terebratellidina	Brachial	Middle	Bulk	2.5	0	34.9	0	0.049	0.105	NADW	1.674	0.05	3.556	0.1			LGLTPE	3.787	0.205			4.21651	0.105438	-0.660506	0.205438
MAF-5	-12.4067	11.045	3431	Terebratellidina	Pedical	Middle	Bulk	2.5	0	34.9	0	0.049	0.105	NADW	1.573	0.05	3.475	0.1			LGLTPE	3.706	0.205			4.21651	0.105438	-0.741506	0.205438					12.5408	1.00625	54.7392	12.7218
WB1A	-66.6333	143.083	868.5	Terebratellidina	Pedical	Middle	Bulk	-1.9	0.2	34.7		-0.129	0.075	AABW	0.837	0.05	3.574	0.1			LGLTPE	3.983	0.175			5.07642	0.123353	-1.50242	0.223353					5.70009	1.21406	36.6897	12.838
