# Supplementary material for: Multi-proxy assessment of brachiopod shell calcite as a potential archive of seawater temperature and oxygen isotope composition
Source: Copernicus journal article supplement (doi:10.5194/bg-20-1381-2023), 2023-04-12
Supplement: Supplementary file 2 [file S5 D47report_Letulle_2022_03.pdf › Supplementary/S5 D47report_Letulle_2022_03.pdf]

# $\Delta_{47}$ Analysis Report — Letulle (2022-03)

Laboratoire des Sciences du Climat et de l'Environnement  
Compiled by M. Daéron (*daeron@lsce.ipsl.fr*) on 2023/03/15

## Summary

|                                                                               |                           |
|-------------------------------------------------------------------------------|---------------------------|
| Number of analytical sessions                                                 | 5                         |
| Number of samples (anchors + unknowns)                                        | 57 (4 + 53)               |
| Number of analyses (anchors + unknowns)                                       | 226 (86 + 140)            |
| Overall percentage of anchor analyses                                         | 38 %                      |
| Nominal $\Delta_{47}$ of anchor ETH-1                                         | 0.2052 ‰                  |
| Nominal $\Delta_{47}$ of anchor ETH-2                                         | 0.2085 ‰                  |
| Nominal $\Delta_{47}$ of anchor ETH-3                                         | 0.6132 ‰                  |
| Nominal $\Delta_{47}$ of anchor ETH-4                                         | 0.4511 ‰                  |
| External reproducibility of $\delta^{13}\text{C}_{\text{VPDB}}$ measurements  | 13.6 ppm                  |
| External reproducibility of $\delta^{18}\text{O}_{\text{VSMOW}}$ measurements | 24.8 ppm                  |
| External reproducibility of $\Delta_{47}$ measurements                        | 7.8 ppm                   |
| Regression model degrees of freedom                                           | 157 ( $t_{95\%} = 1.98$ ) |

## Analytical Sessions

| Session                                            |                          | 2021-09a           | 2021-09b           | 2021-09c           | 2022-03c           | 2022-03e           |
|----------------------------------------------------|--------------------------|--------------------|--------------------|--------------------|--------------------|--------------------|
| N of anchor analyses                               |                          | 21                 | 20                 | 18                 | 11                 | 16                 |
| N of unknown analyses                              |                          | 27                 | 33                 | 27                 | 18                 | 35                 |
| Working gas $\delta^{13}\text{C}$                  | (‰ VPDB)                 | −3.84              | −3.85              | −3.85              | −3.88              | −3.86              |
| Working gas $\delta^{18}\text{O}$                  | (‰ VSMOW)                | 34.57              | 34.55              | 34.59              | 35.17              | 35.18              |
| Working gas $\Delta_{47}$                          | (‰ ± SE)                 | $1.025 \pm 0.010$  | $1.034 \pm 0.010$  | $1.037 \pm 0.011$  | $0.962 \pm 0.014$  | $0.960 \pm 0.012$  |
| Scrambling factor (a)                              | (± SE)                   | $0.988 \pm 0.009$  | $0.976 \pm 0.009$  | $0.979 \pm 0.009$  | $0.956 \pm 0.013$  | $0.963 \pm 0.011$  |
| Compositional slope (b)                            | ( $\times 10^{-4}$ ± SE) | $−0.2 \pm 1.2$     | $−0.2 \pm 1.3$     | $0.2 \pm 1.3$      | $1.2 \pm 2.3$      | $−8.7 \pm 1.8$     |
| Working gas offset (c)                             | (± SE)                   | $−1.013 \pm 0.004$ | $−1.009 \pm 0.004$ | $−1.014 \pm 0.005$ | $−0.919 \pm 0.006$ | $−0.924 \pm 0.005$ |
| $\delta^{13}\text{C}_{\text{VPDB}}$ repeatability  | (ppm)                    | 10.0               | 19.7               | 13.0               | 15.1               | 6.2                |
| $\delta^{18}\text{O}_{\text{VSMOW}}$ repeatability | (ppm)                    | 29.5               | 30.6               | 23.9               | 20.9               | 20.2               |
| $\Delta_{47}$ repeatability                        | (ppm)                    | 10.2               | 7.5                | 6.7                | 8.5                | 9.5                |

## Sample averages

| Sample       | N  | Yield<br>(%) | $\delta^{13}\text{C}_{\text{VPDB}}$ | $\delta^{18}\text{O}_{\text{VSMOW}}$<br>(CO <sub>2</sub> ) | $\delta^{18}\text{O}_{\text{VPDB}}$<br>(calcite*) | $\Delta_{47}$ (I-CDES) |               |                 | p-value<br>(Levene) |
|--------------|----|--------------|-------------------------------------|------------------------------------------------------------|---------------------------------------------------|------------------------|---------------|-----------------|---------------------|
|              |    |              |                                     |                                                            |                                                   | $\pm$ SE               | ( $\pm$ 95 %) | SD              |                     |
| ETH-1        | 21 | 100          | 2.03                                | 37.03                                                      | −2.19                                             | 0.2052                 |               | 0.0080          |                     |
| ETH-2        | 18 | 99           | −10.17                              | 19.87                                                      | −18.69                                            | 0.2085                 |               | 0.0075          |                     |
| ETH-3        | 36 | 97           | 1.70                                | 37.45                                                      | −1.78                                             | 0.6132                 |               | 0.0068          |                     |
| ETH-4        | 11 | 100          | −10.20                              | 19.79                                                      | −18.78                                            | 0.4511                 |               | 0.0090          |                     |
| 707727       | 1  | 101          | 2.40                                | 39.06                                                      | −0.24                                             | 0.6032                 | $\pm$ 0.0083  | ( $\pm$ 0.0163) |                     |
| 707729       | 1  | 97           | 1.49                                | 39.15                                                      | −0.14                                             | 0.6008                 | $\pm$ 0.0082  | ( $\pm$ 0.0163) |                     |
| 707752       | 1  | 98           | 1.33                                | 38.34                                                      | −0.92                                             | 0.5835                 | $\pm$ 0.0082  | ( $\pm$ 0.0162) |                     |
| A-ker-A-d    | 5  | 98           | 1.86                                | 42.20                                                      | 2.79                                              | 0.6747                 | $\pm$ 0.0039  | ( $\pm$ 0.0077) | 0.0054 0.49         |
| A-ker-C-v    | 5  | 98           | 2.50                                | 42.37                                                      | 2.96                                              | 0.6660                 | $\pm$ 0.0039  | ( $\pm$ 0.0077) | 0.0059 0.65         |
| A-ker52-vcs  | 3  | 98           | 2.03                                | 42.80                                                      | 3.37                                              | 0.6665                 | $\pm$ 0.0048  | ( $\pm$ 0.0095) | 0.0005 0.04         |
| A-ker61-vcs  | 5  | 97           | 1.36                                | 41.65                                                      | 2.26                                              | 0.6865                 | $\pm$ 0.0039  | ( $\pm$ 0.0077) | 0.0067 0.79         |
| A-ker68-vcs  | 5  | 98           | 1.57                                | 41.97                                                      | 2.57                                              | 0.6807                 | $\pm$ 0.0039  | ( $\pm$ 0.0078) | 0.0072 0.83         |
| ARD-06       | 4  | 94           | 1.99                                | 36.95                                                      | −2.27                                             | 0.5885                 | $\pm$ 0.0041  | ( $\pm$ 0.0081) | 0.0073 0.89         |
| ARD-08       | 3  | 98           | 2.64                                | 36.82                                                      | −2.38                                             | 0.5906                 | $\pm$ 0.0047  | ( $\pm$ 0.0092) | 0.0112 0.52         |
| BAC-02c      | 1  | 97           | −2.18                               | 37.29                                                      | −1.93                                             | 0.5245                 | $\pm$ 0.0078  | ( $\pm$ 0.0154) |                     |
| FSL-307829b  | 1  | 100          | 1.09                                | 37.10                                                      | −2.12                                             | 0.5513                 | $\pm$ 0.0079  | ( $\pm$ 0.0156) |                     |
| FSL-707721   | 3  | 99           | 1.16                                | 38.75                                                      | −0.53                                             | 0.5957                 | $\pm$ 0.0047  | ( $\pm$ 0.0094) | 0.0085 0.93         |
| FSL-707729   | 1  | 96           | 1.48                                | 39.16                                                      | −0.13                                             | 0.6039                 | $\pm$ 0.0081  | ( $\pm$ 0.0160) |                     |
| H7           | 1  | 94           | −0.52                               | 37.09                                                      | −2.13                                             | 0.5529                 | $\pm$ 0.0082  | ( $\pm$ 0.0162) |                     |
| H9           | 2  | 99           | −2.09                               | 35.97                                                      | −3.21                                             | 0.5773                 | $\pm$ 0.0059  | ( $\pm$ 0.0116) | 0.0195              |
| L-neo-vcs    | 3  | 99           | 2.91                                | 40.91                                                      | 1.55                                              | 0.6290                 | $\pm$ 0.0048  | ( $\pm$ 0.0094) | 0.0086 0.93         |
| L-opa        | 1  | 97           | 0.92                                | 36.81                                                      | −2.40                                             | 0.5377                 | $\pm$ 0.0082  | ( $\pm$ 0.0161) |                     |
| L-uva-vcs    | 3  | 94           | 0.63                                | 42.76                                                      | 3.33                                              | 0.6937                 | $\pm$ 0.0048  | ( $\pm$ 0.0095) | 0.0087 0.99         |
| M-fra-vcs    | 4  | 98           | 1.01                                | 43.44                                                      | 3.98                                              | 0.6917                 | $\pm$ 0.0043  | ( $\pm$ 0.0085) | 0.0062 0.85         |
| N-len-mi     | 5  | 96           | 1.13                                | 39.83                                                      | 0.51                                              | 0.6713                 | $\pm$ 0.0039  | ( $\pm$ 0.0076) | 0.0072 0.75         |
| N-nig        | 3  | 95           | 2.10                                | 40.60                                                      | 1.25                                              | 0.6496                 | $\pm$ 0.0048  | ( $\pm$ 0.0094) | 0.0063 0.50         |
| SP-1071      | 1  | 97           | 3.57                                | 39.17                                                      | −0.12                                             | 0.5433                 | $\pm$ 0.0079  | ( $\pm$ 0.0155) |                     |
| SP-1072      | 1  | 97           | 3.32                                | 39.57                                                      | 0.26                                              | 0.5569                 | $\pm$ 0.0079  | ( $\pm$ 0.0155) |                     |
| SP-1076      | 1  | 96           | 1.56                                | 38.20                                                      | −1.05                                             | 0.5662                 | $\pm$ 0.0078  | ( $\pm$ 0.0155) |                     |
| SP-121-cs    | 4  | 100          | 3.53                                | 37.26                                                      | −1.97                                             | 0.6646                 | $\pm$ 0.0042  | ( $\pm$ 0.0082) | 0.0031 0.12         |
| SP-137-a     | 1  | 100          | 2.44                                | 39.15                                                      | −0.15                                             | 0.5466                 | $\pm$ 0.0078  | ( $\pm$ 0.0155) |                     |
| SP-254-Da    | 3  | 99           | 5.19                                | 38.77                                                      | −0.51                                             | 0.6333                 | $\pm$ 0.0048  | ( $\pm$ 0.0094) | 0.0061 0.53         |
| SP-29        | 3  | 98           | 3.75                                | 37.34                                                      | −1.88                                             | 0.6691                 | $\pm$ 0.0048  | ( $\pm$ 0.0094) | 0.0061 0.54         |
| SP-368-Db    | 3  | 99           | 6.56                                | 38.73                                                      | −0.55                                             | 0.6232                 | $\pm$ 0.0048  | ( $\pm$ 0.0094) | 0.0082 0.89         |
| SP-368-Oa    | 3  | 100          | 5.75                                | 38.48                                                      | −0.79                                             | 0.6499                 | $\pm$ 0.0048  | ( $\pm$ 0.0094) | 0.0073 0.73         |
| SP-387-Da    | 3  | 99           | 4.93                                | 38.47                                                      | −0.80                                             | 0.6265                 | $\pm$ 0.0047  | ( $\pm$ 0.0094) | 0.0021 0.09         |
| SP-459-Da    | 3  | 96           | 4.72                                | 38.57                                                      | −0.70                                             | 0.6293                 | $\pm$ 0.0047  | ( $\pm$ 0.0094) | 0.0029 0.12         |
| SP-74-cs     | 4  | 98           | 4.21                                | 34.75                                                      | −4.38                                             | 0.6649                 | $\pm$ 0.0041  | ( $\pm$ 0.0082) | 0.0026 0.07         |
| T-gal-4-v-mi | 5  | 100          | 2.75                                | 40.80                                                      | 1.44                                              | 0.6109                 | $\pm$ 0.0038  | ( $\pm$ 0.0075) | 0.0072 0.94         |
| T-san-v      | 3  | 97           | 0.52                                | 39.78                                                      | 0.46                                              | 0.6635                 | $\pm$ 0.0048  | ( $\pm$ 0.0094) | 0.0012 0.06         |
| VR-100S      | 3  | 99           | 5.97                                | 37.33                                                      | −1.89                                             | 0.6198                 | $\pm$ 0.0050  | ( $\pm$ 0.0099) | 0.0065 0.63         |
| VR-103S      | 3  | 82           | 7.69                                | 38.08                                                      | −1.18                                             | 0.6396                 | $\pm$ 0.0051  | ( $\pm$ 0.0101) | 0.0148 0.10         |
| VR-104S      | 3  | 97           | 4.43                                | 37.38                                                      | −1.84                                             | 0.6220                 | $\pm$ 0.0050  | ( $\pm$ 0.0098) | 0.0053 0.43         |
| VR-108S      | 3  | 100          | 6.41                                | 37.71                                                      | −1.53                                             | 0.6313                 | $\pm$ 0.0051  | ( $\pm$ 0.0101) | 0.0034 0.17         |
| VR-110S-1    | 3  | 96           | 4.46                                | 38.56                                                      | −0.72                                             | 0.6322                 | $\pm$ 0.0050  | ( $\pm$ 0.0099) | 0.0102 0.79         |
| VR-111S      | 3  | 99           | 7.65                                | 37.94                                                      | −1.30                                             | 0.6244                 | $\pm$ 0.0051  | ( $\pm$ 0.0100) | 0.0049 0.31         |
| VR-120S-ext  | 2  | 99           | 3.96                                | 37.52                                                      | −1.71                                             | 0.6462                 | $\pm$ 0.0061  | ( $\pm$ 0.0120) | 0.0012              |
| VR-120S-int  | 2  | 99           | 4.06                                | 38.10                                                      | −1.15                                             | 0.6628                 | $\pm$ 0.0061  | ( $\pm$ 0.0120) | 0.0184              |
| VR-121S      | 2  | 99           | 5.48                                | 38.96                                                      | −0.32                                             | 0.6695                 | $\pm$ 0.0060  | ( $\pm$ 0.0119) | 0.0007              |
| VR-26S-D2    | 2  | 99           | 8.12                                | 38.30                                                      | −0.96                                             | 0.6233                 | $\pm$ 0.0060  | ( $\pm$ 0.0119) | 0.0034              |
| VR-55S       | 3  | 99           | 6.99                                | 36.98                                                      | −2.23                                             | 0.6197                 | $\pm$ 0.0050  | ( $\pm$ 0.0099) | 0.0025 0.11         |
| VR-59S       | 1  | 98           | 6.16                                | 37.64                                                      | −1.60                                             | 0.6326                 | $\pm$ 0.0082  | ( $\pm$ 0.0163) |                     |
| VR-59S-1     | 1  | 99           | 6.16                                | 37.58                                                      | −1.65                                             | 0.6295                 | $\pm$ 0.0083  | ( $\pm$ 0.0164) |                     |
| VR-61S       | 2  | 99           | 6.37                                | 36.98                                                      | −2.24                                             | 0.6369                 | $\pm$ 0.0060  | ( $\pm$ 0.0119) | 0.0158              |
| VR-63S-1     | 2  | 99           | 5.50                                | 36.87                                                      | −2.34                                             | 0.6254                 | $\pm$ 0.0060  | ( $\pm$ 0.0118) | 0.0010              |
| VR-80S       | 3  | 99           | 5.42                                | 39.17                                                      | −0.13                                             | 0.6332                 | $\pm$ 0.0051  | ( $\pm$ 0.0101) | 0.0084 0.95         |
| VR-81S       | 3  | 98           | 6.17                                | 37.99                                                      | −1.26                                             | 0.6292                 | $\pm$ 0.0051  | ( $\pm$ 0.0100) | 0.0081 0.96         |

\* computed assuming the sample is pure calcite; adjust accordingly for different mineralogies.

For example, for aragonite samples,  $\delta^{18}\text{O}_{\text{arag}} = (1000 + \delta^{18}\text{O}_{\text{calcite}}) \times 1.00813 / ^{18}\alpha_{\text{arag}} - 1000$

Based on Kim *et al.* [2007], at 90 °C:  $\delta^{18}\text{O}_{\text{arag}} = (1000 + \delta^{18}\text{O}_{\text{calcite}}) / 1.00041 - 1000$

## Temperature and water $\delta^{18}\text{O}$ reconstructions

| Sample       | N | $\Delta_{47}$       | $T_{47}$        | Water $\delta^{18}\text{O}_{\text{VSMOW}}$ (‰ $\pm$ 95 %) |                      |
|--------------|---|---------------------|-----------------|-----------------------------------------------------------|----------------------|
|              |   | (‰ $\pm$ 95 %)      | (°C $\pm$ 95 %) | Kim & O'Neil [1997]                                       | Daëron et al. [2019] |
| 707727       | 1 | $0.6032 \pm 0.0163$ | $22.0 \pm 5.3$  | $+1.5 \pm 1.1$                                            | $-0.2 \pm 1.1$       |
| 707729       | 1 | $0.6008 \pm 0.0163$ | $22.8 \pm 5.3$  | $+1.8 \pm 1.1$                                            | $+0.1 \pm 1.1$       |
| 707752       | 1 | $0.5835 \pm 0.0162$ | $28.6 \pm 5.6$  | $+2.2 \pm 1.1$                                            | $+0.4 \pm 1.1$       |
| A-ker-A-d    | 5 | $0.6747 \pm 0.0077$ | $1.2 \pm 2.0$   | $-0.0 \pm 0.5$                                            | $-1.7 \pm 0.5$       |
| A-ker-C-v    | 5 | $0.6660 \pm 0.0077$ | $3.5 \pm 2.1$   | $+0.7 \pm 0.5$                                            | $-1.0 \pm 0.5$       |
| A-ker52-vcs  | 3 | $0.6665 \pm 0.0095$ | $3.4 \pm 2.5$   | $+1.0 \pm 0.6$                                            | $-0.6 \pm 0.6$       |
| A-ker61-vcs  | 5 | $0.6865 \pm 0.0077$ | $-1.8 \pm 1.9$  | $-1.3 \pm 0.5$                                            | $-2.9 \pm 0.5$       |
| A-ker68-vcs  | 5 | $0.6807 \pm 0.0078$ | $-0.3 \pm 2.0$  | $-0.6 \pm 0.5$                                            | $-2.2 \pm 0.5$       |
| ARD-06       | 4 | $0.5885 \pm 0.0081$ | $26.9 \pm 2.8$  | $+0.5 \pm 0.6$                                            | $-1.3 \pm 0.5$       |
| ARD-08       | 3 | $0.5906 \pm 0.0092$ | $26.1 \pm 3.1$  | $+0.2 \pm 0.6$                                            | $-1.5 \pm 0.6$       |
| BAC-02c      | 1 | $0.5245 \pm 0.0154$ | $51.5 \pm 6.7$  | $+5.4 \pm 1.1$                                            | $+3.5 \pm 1.1$       |
| FSL-307829b  | 1 | $0.5513 \pm 0.0156$ | $40.4 \pm 6.1$  | $+3.3 \pm 1.1$                                            | $+1.4 \pm 1.1$       |
| FSL-707721   | 3 | $0.5957 \pm 0.0094$ | $24.4 \pm 3.1$  | $+1.8 \pm 0.6$                                            | $+0.0 \pm 0.6$       |
| FSL-707729   | 1 | $0.6039 \pm 0.0160$ | $21.7 \pm 5.2$  | $+1.6 \pm 1.1$                                            | $-0.1 \pm 1.0$       |
| H7           | 1 | $0.5529 \pm 0.0162$ | $39.8 \pm 6.3$  | $+3.1 \pm 1.2$                                            | $+1.3 \pm 1.1$       |
| H9           | 2 | $0.5773 \pm 0.0116$ | $30.8 \pm 4.1$  | $+0.3 \pm 0.8$                                            | $-1.4 \pm 0.8$       |
| L-neo-vcs    | 3 | $0.6290 \pm 0.0094$ | $14.0 \pm 2.8$  | $+1.6 \pm 0.6$                                            | $-0.1 \pm 0.6$       |
| L-opa        | 1 | $0.5377 \pm 0.0161$ | $45.9 \pm 6.6$  | $+4.0 \pm 1.2$                                            | $+2.1 \pm 1.1$       |
| L-uva-vcs    | 3 | $0.6937 \pm 0.0095$ | $-3.5 \pm 2.3$  | $-0.7 \pm 0.6$                                            | $-2.3 \pm 0.6$       |
| M-fra-vcs    | 4 | $0.6917 \pm 0.0085$ | $-3.0 \pm 2.1$  | $+0.1 \pm 0.5$                                            | $-1.5 \pm 0.5$       |
| N-len-mi     | 5 | $0.6713 \pm 0.0076$ | $2.1 \pm 2.0$   | $-2.1 \pm 0.5$                                            | $-3.7 \pm 0.5$       |
| N-nig        | 3 | $0.6496 \pm 0.0094$ | $8.0 \pm 2.6$   | $+0.0 \pm 0.6$                                            | $-1.7 \pm 0.6$       |
| SP-1071      | 1 | $0.5433 \pm 0.0155$ | $43.6 \pm 6.2$  | $+5.8 \pm 1.1$                                            | $+4.0 \pm 1.1$       |
| SP-1072      | 1 | $0.5569 \pm 0.0155$ | $38.3 \pm 5.9$  | $+5.2 \pm 1.1$                                            | $+3.4 \pm 1.1$       |
| SP-1076      | 1 | $0.5662 \pm 0.0155$ | $34.8 \pm 5.7$  | $+3.3 \pm 1.1$                                            | $+1.5 \pm 1.1$       |
| SP-121-cs    | 4 | $0.6646 \pm 0.0082$ | $3.9 \pm 2.2$   | $-4.2 \pm 0.5$                                            | $-5.8 \pm 0.5$       |
| SP-137-a     | 1 | $0.5466 \pm 0.0155$ | $42.3 \pm 6.2$  | $+5.6 \pm 1.1$                                            | $+3.7 \pm 1.1$       |
| SP-254-Da    | 3 | $0.6333 \pm 0.0094$ | $12.7 \pm 2.8$  | $-0.7 \pm 0.6$                                            | $-2.4 \pm 0.6$       |
| SP-29        | 3 | $0.6691 \pm 0.0094$ | $2.7 \pm 2.5$   | $-4.4 \pm 0.6$                                            | $-6.0 \pm 0.6$       |
| SP-368-Db    | 3 | $0.6232 \pm 0.0094$ | $15.7 \pm 2.9$  | $-0.1 \pm 0.6$                                            | $-1.8 \pm 0.6$       |
| SP-368-Oa    | 3 | $0.6499 \pm 0.0094$ | $8.0 \pm 2.6$   | $-2.1 \pm 0.6$                                            | $-3.7 \pm 0.6$       |
| SP-387-Da    | 3 | $0.6265 \pm 0.0094$ | $14.7 \pm 2.8$  | $-0.6 \pm 0.6$                                            | $-2.3 \pm 0.6$       |
| SP-459-Da    | 3 | $0.6293 \pm 0.0094$ | $13.9 \pm 2.8$  | $-0.6 \pm 0.6$                                            | $-2.3 \pm 0.6$       |
| SP-74-cs     | 4 | $0.6649 \pm 0.0082$ | $3.8 \pm 2.2$   | $-6.6 \pm 0.5$                                            | $-8.2 \pm 0.5$       |
| T-gal-4-v-mi | 5 | $0.6109 \pm 0.0075$ | $19.5 \pm 2.4$  | $+2.7 \pm 0.5$                                            | $+1.0 \pm 0.5$       |
| T-san-v      | 3 | $0.6635 \pm 0.0094$ | $4.2 \pm 2.5$   | $-1.7 \pm 0.6$                                            | $-3.3 \pm 0.6$       |
| VR-100S      | 3 | $0.6198 \pm 0.0099$ | $16.8 \pm 3.0$  | $-1.2 \pm 0.7$                                            | $-2.9 \pm 0.6$       |
| VR-103S      | 3 | $0.6396 \pm 0.0101$ | $10.9 \pm 2.9$  | $-1.8 \pm 0.6$                                            | $-3.5 \pm 0.6$       |
| VR-104S      | 3 | $0.6220 \pm 0.0098$ | $16.1 \pm 3.0$  | $-1.3 \pm 0.6$                                            | $-3.0 \pm 0.6$       |
| VR-108S      | 3 | $0.6313 \pm 0.0101$ | $13.3 \pm 3.0$  | $-1.6 \pm 0.7$                                            | $-3.3 \pm 0.6$       |
| VR-110S-1    | 3 | $0.6322 \pm 0.0099$ | $13.0 \pm 2.9$  | $-0.8 \pm 0.6$                                            | $-2.5 \pm 0.6$       |
| VR-111S      | 3 | $0.6244 \pm 0.0100$ | $15.3 \pm 3.0$  | $-0.9 \pm 0.7$                                            | $-2.6 \pm 0.6$       |
| VR-120S-ext  | 2 | $0.6462 \pm 0.0120$ | $9.0 \pm 3.4$   | $-2.7 \pm 0.8$                                            | $-4.4 \pm 0.7$       |
| VR-120S-int  | 2 | $0.6628 \pm 0.0120$ | $4.4 \pm 3.2$   | $-3.2 \pm 0.8$                                            | $-4.9 \pm 0.7$       |
| VR-121S      | 2 | $0.6695 \pm 0.0119$ | $2.6 \pm 3.1$   | $-2.8 \pm 0.7$                                            | $-4.4 \pm 0.7$       |
| VR-26S-D2    | 2 | $0.6233 \pm 0.0119$ | $15.7 \pm 3.6$  | $-0.5 \pm 0.8$                                            | $-2.2 \pm 0.8$       |
| VR-55S       | 3 | $0.6197 \pm 0.0099$ | $16.8 \pm 3.0$  | $-1.5 \pm 0.7$                                            | $-3.2 \pm 0.6$       |
| VR-59S       | 1 | $0.6326 \pm 0.0163$ | $12.9 \pm 4.8$  | $-1.8 \pm 1.1$                                            | $-3.4 \pm 1.0$       |
| VR-59S-1     | 1 | $0.6295 \pm 0.0164$ | $13.8 \pm 4.9$  | $-1.6 \pm 1.1$                                            | $-3.3 \pm 1.0$       |
| VR-61S       | 2 | $0.6369 \pm 0.0119$ | $11.6 \pm 3.5$  | $-2.7 \pm 0.8$                                            | $-4.3 \pm 0.7$       |
| VR-63S-1     | 2 | $0.6254 \pm 0.0118$ | $15.1 \pm 3.5$  | $-2.0 \pm 0.8$                                            | $-3.7 \pm 0.7$       |
| VR-80S       | 3 | $0.6332 \pm 0.0101$ | $12.7 \pm 3.0$  | $-0.3 \pm 0.7$                                            | $-2.0 \pm 0.6$       |
| VR-81S       | 3 | $0.6292 \pm 0.0100$ | $13.9 \pm 3.0$  | $-1.2 \pm 0.6$                                            | $-2.9 \pm 0.6$       |

Temperature reconstructions based on a composite I-CDES calibration for calcite based on several studies [Peral et al., 2018; Jautzy et al., 2020; Anderson et al., 2021; Fiebig et al., 2021; Huyghe et al., 2022].

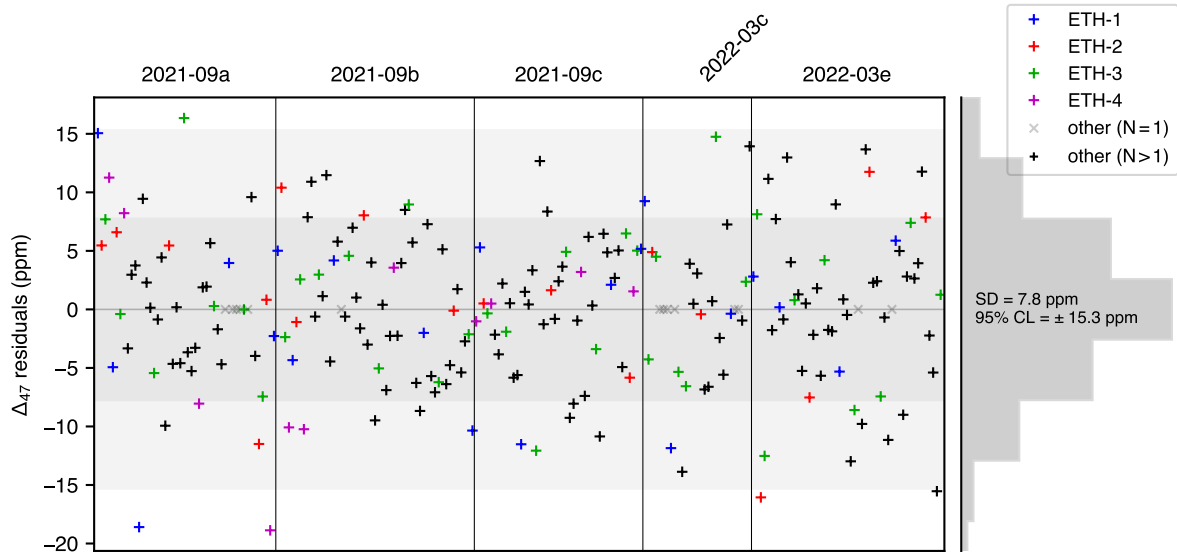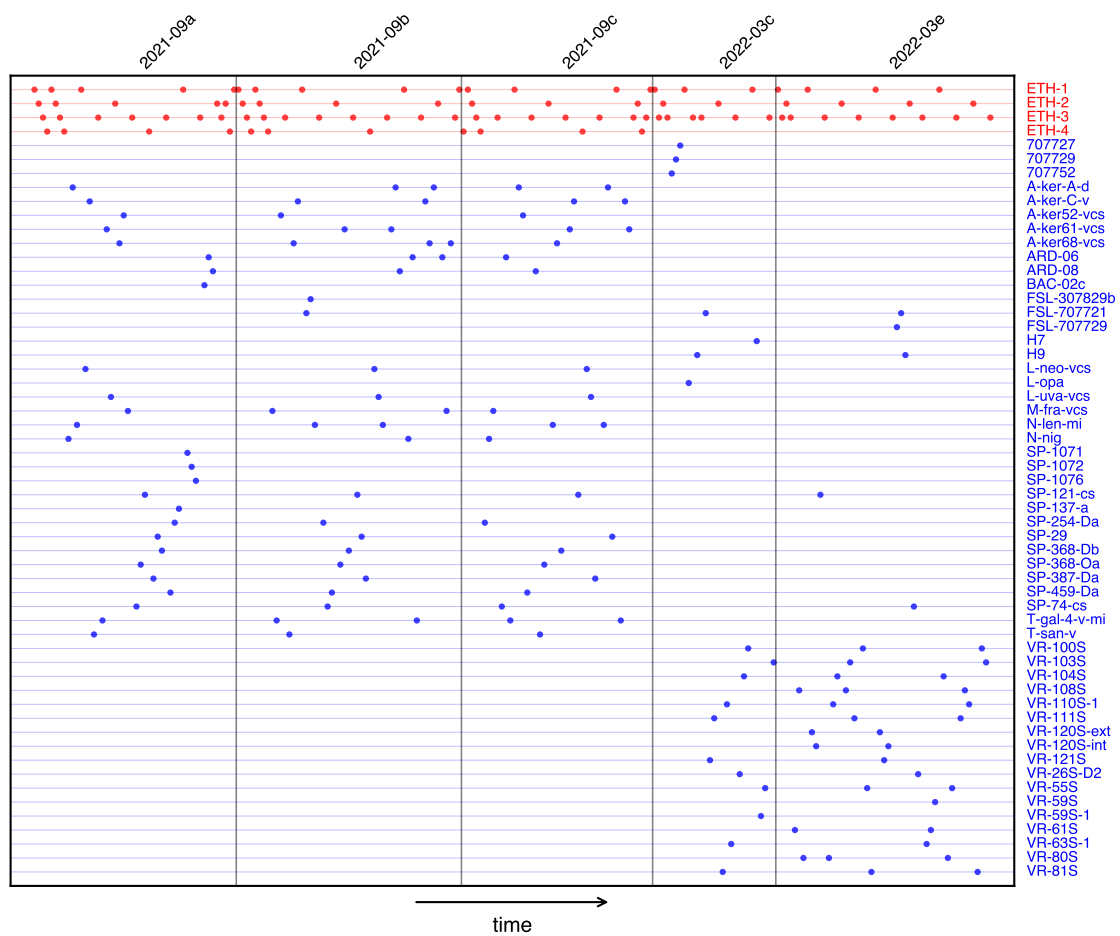

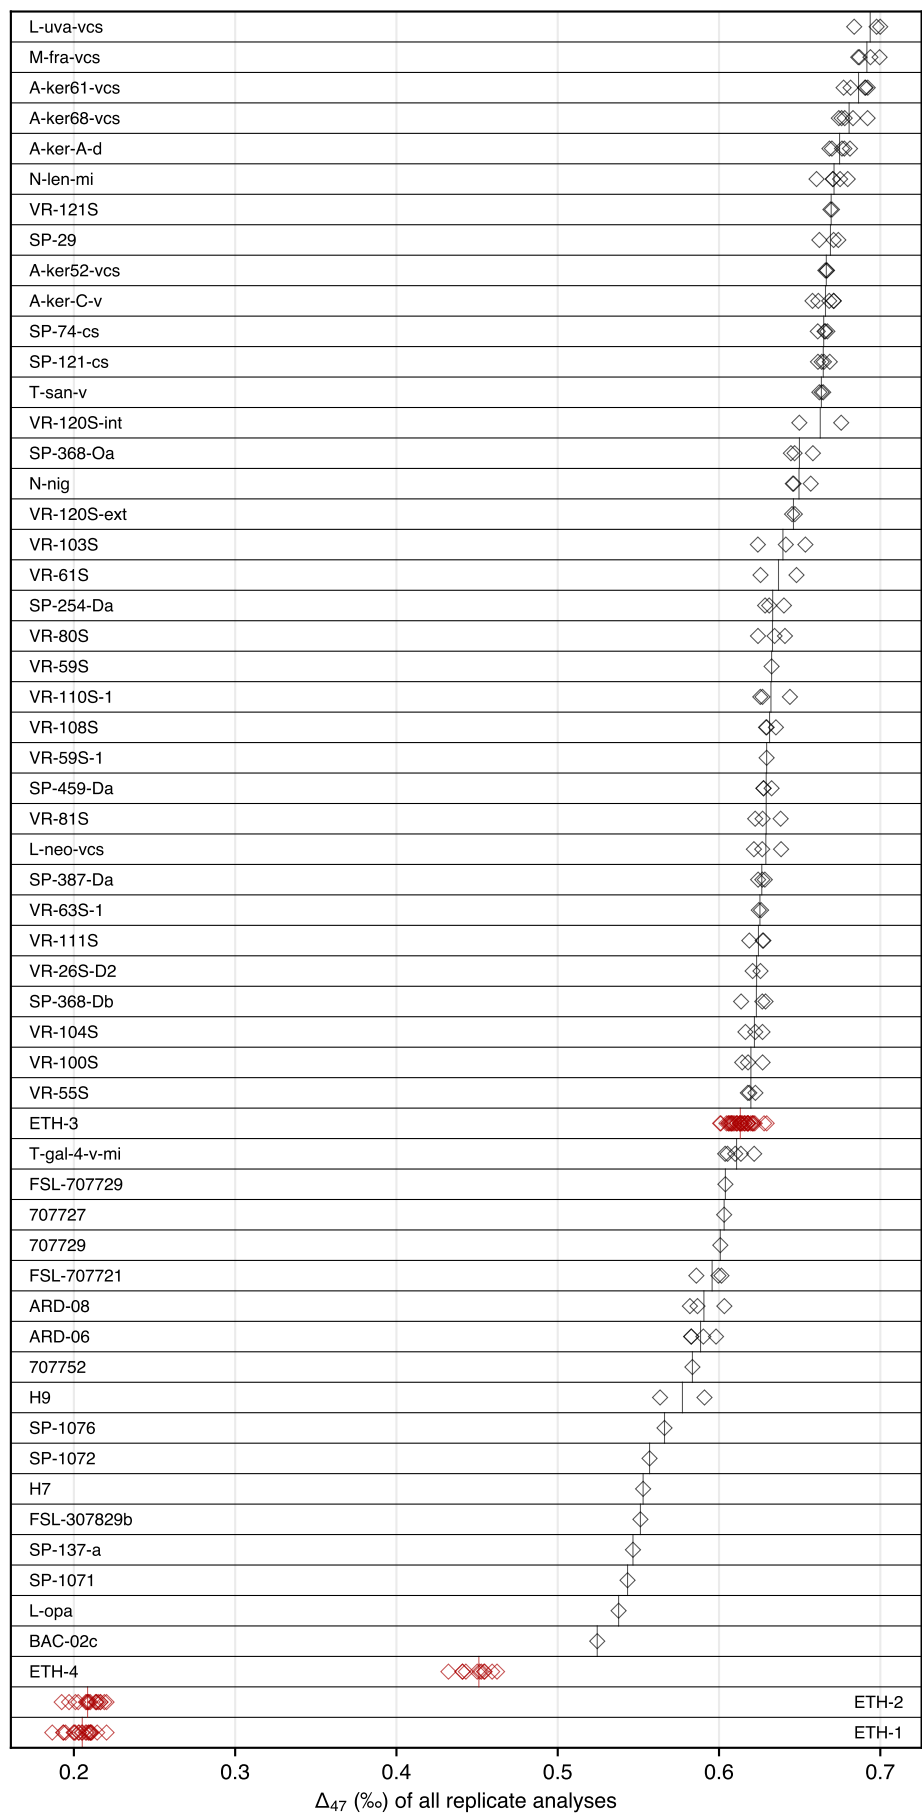

|              |  |  |  |                 |       |
|--------------|--|--|--|-----------------|-------|
| ETH-1        |  |  |  | x x x x x x x x |       |
| ETH-2        |  |  |  | x x x x x x x x |       |
| ETH-3        |  |  |  | x x x x x x x x |       |
| ETH-4        |  |  |  | x x x x x x x x |       |
| 707727       |  |  |  |                 | x     |
| 707729       |  |  |  | x               |       |
| 707752       |  |  |  | x               |       |
| A-ker-A-d    |  |  |  | x x             | x     |
| A-ker-C-v    |  |  |  | x x             |       |
| A-ker52-vcs  |  |  |  | x x x           |       |
| A-ker61-vcs  |  |  |  | x x x x         |       |
| A-ker68-vcs  |  |  |  | x x x x x       |       |
| ARD-06       |  |  |  | x x x x         |       |
| ARD-08       |  |  |  | x x x           |       |
| BAC-02c      |  |  |  | x               |       |
| FSL-307829b  |  |  |  |                 | x     |
| FSL-707721   |  |  |  | x               | x     |
| FSL-707729   |  |  |  | x               |       |
| H7           |  |  |  | x               |       |
| H9           |  |  |  | x               |       |
| L-neo-vcs    |  |  |  | x x x           |       |
| L-opa        |  |  |  | x               |       |
| L-uva-vcs    |  |  |  | x x             |       |
| M-fra-vcs    |  |  |  | x x x x         |       |
| N-len-mi     |  |  |  | x x x x         |       |
| N-nig        |  |  |  | x x x x         |       |
| SP-1071      |  |  |  | x               |       |
| SP-1072      |  |  |  | x               |       |
| SP-1076      |  |  |  | x               |       |
| SP-121-CS    |  |  |  |                 | x x x |
| SP-137-a     |  |  |  |                 | x     |
| SP-254-Da    |  |  |  |                 | x x   |
| SP-29        |  |  |  | x               | x x   |
| SP-368-Db    |  |  |  | x               | x x   |
| SP-368-Oa    |  |  |  |                 | x x   |
| SP-387-Da    |  |  |  |                 | x x   |
| SP-459-Da    |  |  |  | x               | x x   |
| SP-74-CS     |  |  |  |                 | x x x |
| T-gal-4-V-MI |  |  |  | x               | x x x |
| T-san-v      |  |  |  | x               | x x   |
| VR-100S      |  |  |  |                 | x x x |
| VR-103S      |  |  |  | x x             |       |
| VR-104S      |  |  |  | x x x           |       |
| VR-108S      |  |  |  |                 | x x x |
| VR-110S-1    |  |  |  | x x x           |       |
| VR-111S      |  |  |  |                 | x x x |
| VR-120S-ext  |  |  |  |                 | x x   |
| VR-120S-int  |  |  |  |                 | x x   |
| VR-121S      |  |  |  | x               | x     |
| VR-26S-D2    |  |  |  |                 | x x   |
| VR-55S       |  |  |  |                 | x x   |
| VR-59S       |  |  |  | x               |       |
| VR-59S-1     |  |  |  |                 | x     |
| VR-61S       |  |  |  |                 | x x   |
| VR-63S-1     |  |  |  |                 | x     |
| VR-80S       |  |  |  |                 | x x x |
| VR-81S       |  |  |  |                 | x x   |

0.80                      0.85                      0.90                      0.95                      1.00

Acid reaction yield (assuming pure  $\text{CaCO}_3$ ) of all analyses

## Methods

Carbonate samples were converted to  $\text{CO}_2$  by phosphoric acid reaction at  $90^\circ\text{C}$  in a common, stirred acid bath for 15 minutes. Initial phosphoric acid concentration was 103 % ( $1.91\text{ g/cm}^3$ ) and each batch of acid was used for 7 days. After cryogenic removal of water, the evolved  $\text{CO}_2$  was helium-flushed at  $25\text{ mL/mn}$  through a purification column packed with Porapak Q (50/80 mesh, 1 m length, 2.1 mm ID) and held at  $-20^\circ\text{C}$ , then quantitatively recollected by cryogenic trapping and transferred into an Isoprime 100 dual-inlet mass spectrometer equipped with six Faraday collectors ( $m/z$  44–49). Each analysis took about 2.5 hours, during which analyte gas and working reference gas were allowed to flow from matching, 10 mL reservoirs into the source through deactivated fused silica capillaries (65 cm length,  $110\text{ }\mu\text{m}$  ID). Every 20 minutes, gas pressures were adjusted to achieve  $m/z = 44$  current of 80 nA, with differences between analyte gas and working gas generally below 0.1 nA. Pressure-dependent background current corrections were measured 12 times for each analysis. All background measurements from a given session within  $\pm 6$  hours of any given analysis were used to determine a mass-specific relationship for that analysis, linking background intensity ( $Z_m$ ), total  $m/z = 44$  intensity ( $I_{44}$ ), and time ( $t$ ):  $Z_m = aI_{44} + P(t)$ , with  $P$  being a polynomial of degree 2 to 4. Background-corrected ion current ratios ( $\delta_{45}$  to  $\delta_{49}$ ) were converted to  $\delta^{13}\text{C}$ ,  $\delta^{18}\text{O}$ , and “raw”  $\Delta_{47}$  values as described by *Daëron et al.* [2016] using the IUPAC oxygen-17 correction parameters [Brand et al., 2010]. The isotopic composition ( $\delta^{13}\text{C}$ ,  $\delta^{18}\text{O}$ ) of our working reference gas was computed based on the nominal isotopic composition of all ETH carbonate standards [Bernasconi et al., 2018] and an oxygen-18 acid fractionation factor of 1.00813 [Kim et al., 2007]. Raw  $\Delta_{47}$  values were then converted to the I-CDES reference frame [Bernasconi et al., 2021] using a pooled regression approach [Daëron, 2021] as implemented by the *D47crunch* Python library. Full analytical errors are derived from the external reproducibility of unknowns and standards ( $N_f = 157$ ) and conservatively account for the uncertainties in raw  $\Delta_{47}$  measurements as well as those associated with the conversion to the I-CDES reference frame [Daëron, 2021].

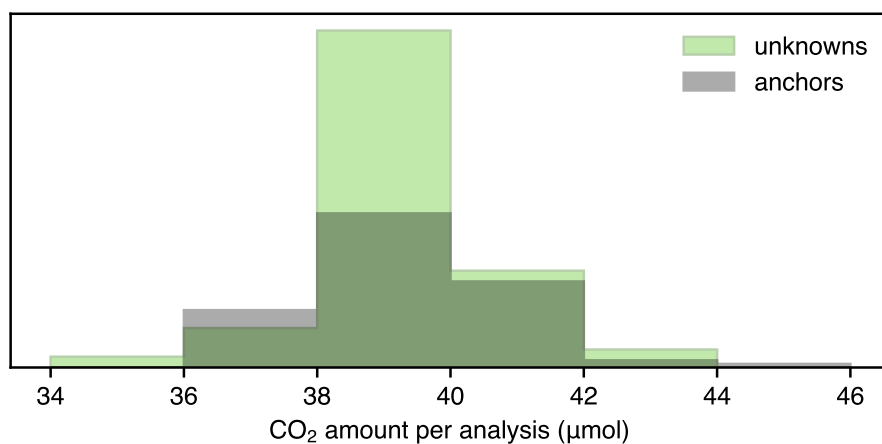

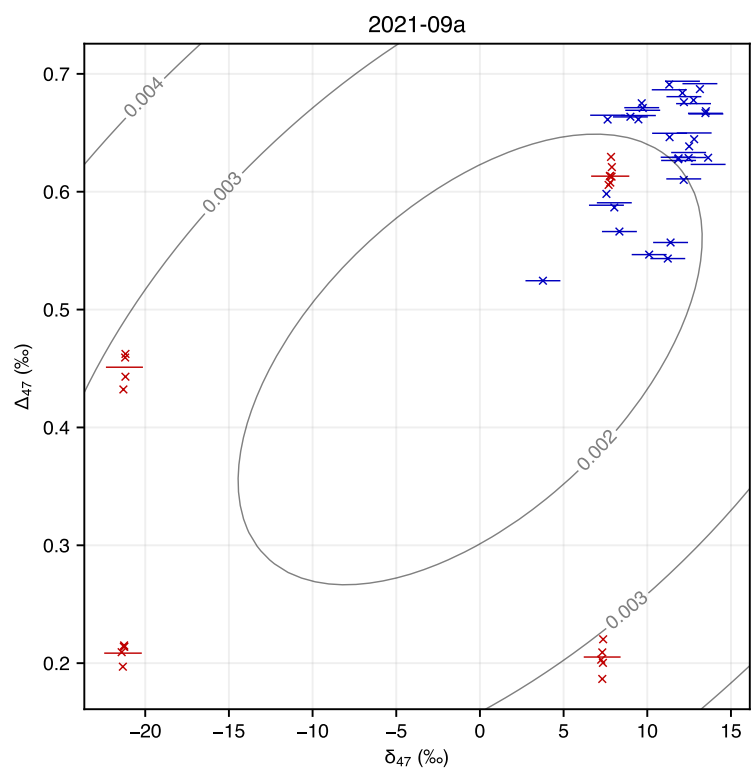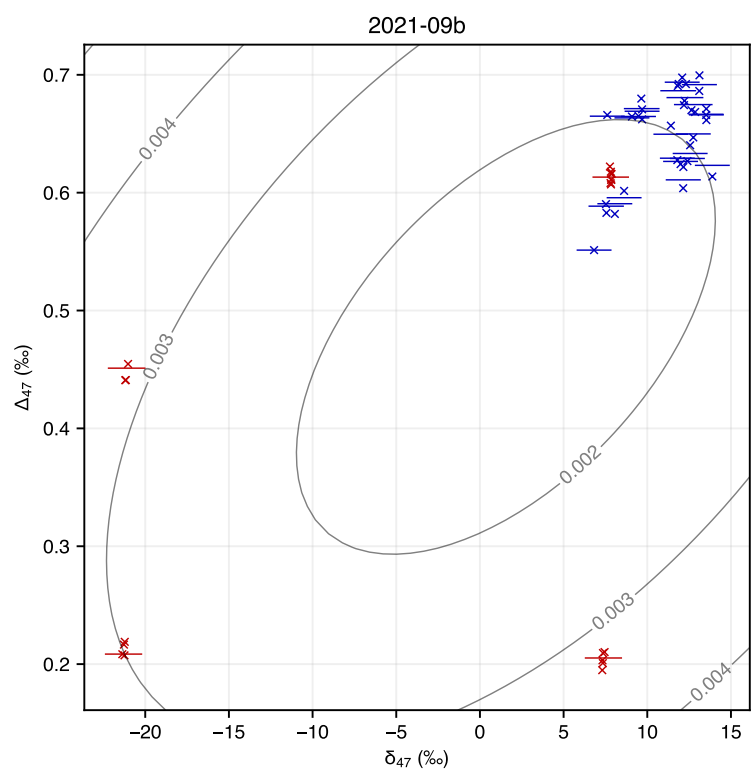



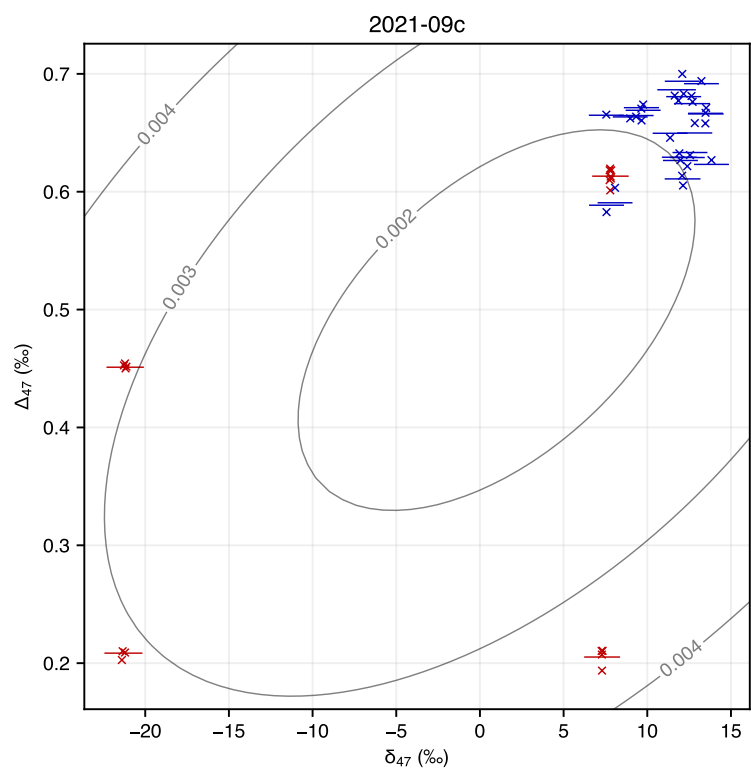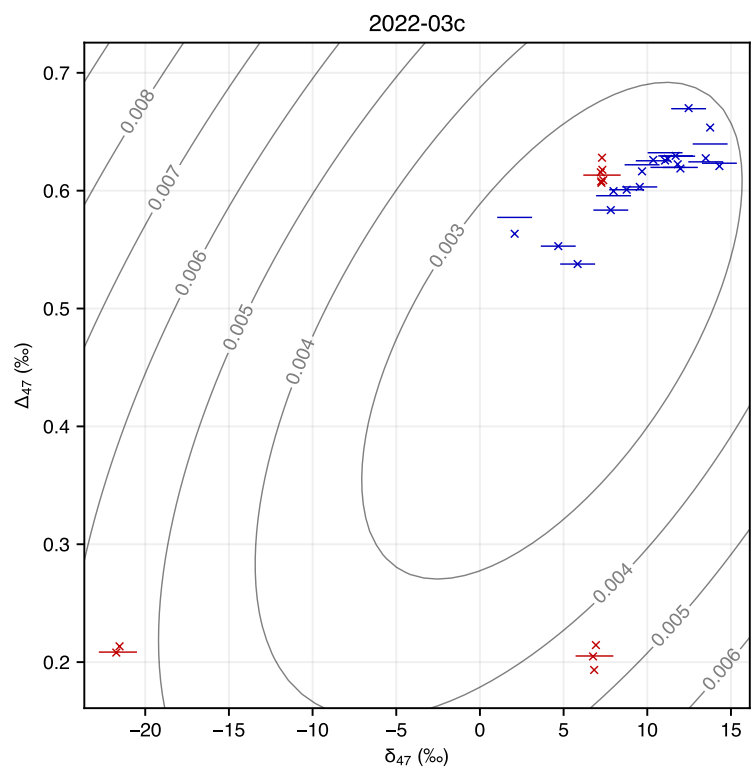

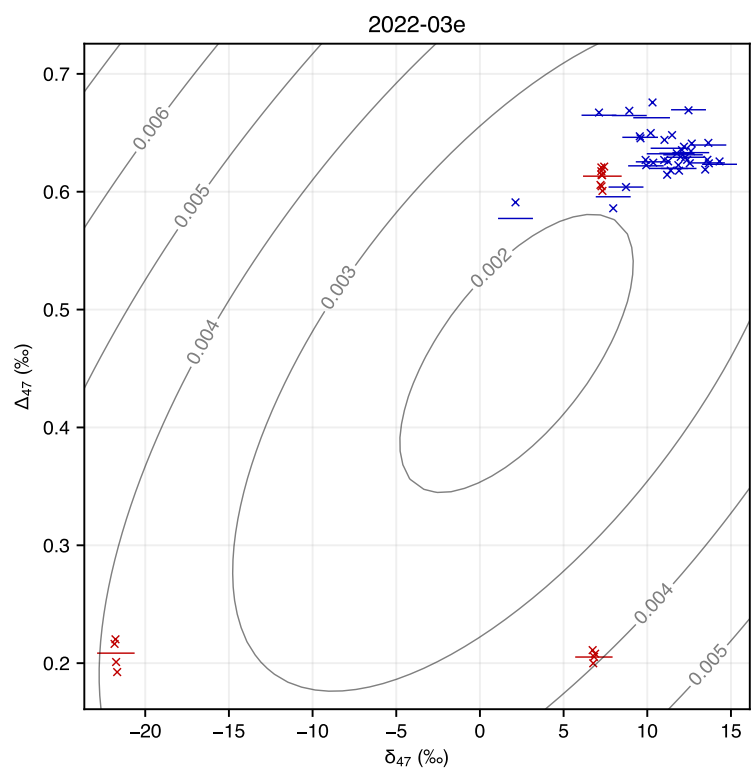

| UID  | Session  | Sample       | Mass<br>(mg) | CO <sub>2</sub> yield<br>(if CaCO <sub>3</sub> ) | δ45<br>(‰ WG) | δ46<br>(‰ WG) | δ47<br>(‰ WG) | δ48<br>(‰ WG) | δ49<br>(‰ WG) | δ <sup>13</sup> C <sub>V-PDB</sub><br>(‰) | δ <sup>18</sup> O <sub>V-SMOW</sub><br>(‰) | Δ <sup>45</sup> <sub>AN</sub><br>(‰) | Δ <sup>47</sup> <sub>AN</sub><br>(‰) |
|------|----------|--------------|--------------|--------------------------------------------------|---------------|---------------|---------------|---------------|---------------|-------------------------------------------|--------------------------------------------|--------------------------------------|--------------------------------------|
| 1224 | 2021-09a | ETH-1        | 4.03         | 1.01                                             | 5.585006      | 2.429445      | 7.362685      | 4.432815      | -1.237147     | 2.030                                     | 37.001                                     | -0.795560                            | 0.220256                             |
| 1225 | 2021-09a | ETH-2        | 4.14         | 1.00                                             | -6.406381     | -14.184762    | -21.248697    | -28.973111    | -1.933536     | -10.158                                   | 19.859                                     | -0.801154                            | 0.213965                             |
| 1226 | 2021-09a | ETH-3        | 3.92         | 0.96                                             | 5.297236      | 2.853776      | 7.883517      | 5.403550      | -1.494947     | 1.707                                     | 37.459                                     | -0.399741                            | 0.620895                             |
| 1227 | 2021-09a | ETH-4        | 4.11         | 1.01                                             | -6.462800     | -14.302426    | -21.180531    | -29.314712    | -2.953794     | -10.214                                   | 19.753                                     | -0.555741                            | 0.462360                             |
| 1228 | 2021-09a | ETH-1        | 3.96         | 1.01                                             | 5.591305      | 2.429640      | 7.349471      | 4.321416      | -1.044539     | 2.037                                     | 37.033                                     | -0.815314                            | 0.200262                             |
| 1229 | 2021-09a | ETH-2        | 3.68         | 0.99                                             | -6.401020     | -14.205336    | -21.262240    | -29.168824    | -2.723346     | -10.151                                   | 19.865                                     | -0.800041                            | 0.215091                             |
| 1230 | 2021-09a | ETH-3        | 3.74         | 0.97                                             | 5.300694      | 2.839457      | 7.864884      | 5.402809      | -1.689432     | 1.711                                     | 37.468                                     | -0.407734                            | 0.612804                             |
| 1231 | 2021-09a | ETH-4        | 4.21         | 1.01                                             | -6.461610     | -14.320981    | -21.200378    | -29.467295    | -2.090002     | -10.212                                   | 19.755                                     | -0.558744                            | 0.459321                             |
| 1232 | 2021-09a | N-nig        | 3.89         | 0.93                                             | 5.762743      | 5.829851      | 11.332279     | 11.570669     | -1.565708     | 2.094                                     | 40.568                                     | -0.374755                            | 0.646260                             |
| 1233 | 2021-09a | A-ker-A-d    | 3.94         | 0.97                                             | 5.619749      | 7.397237      | 12.764542     | 14.768409     | -0.767338     | 1.883                                     | 42.192                                     | -0.343722                            | 0.677702                             |
| 1234 | 2021-09a | N-len-mi     | 4.05         | 0.96                                             | 4.836217      | 5.088340      | 9.667583      | 9.991417      | -1.558302     | 1.132                                     | 39.811                                     | -0.346261                            | 0.675064                             |
| 1235 | 2021-09a | ETH-1        | 4.46         | 1.00                                             | 5.590324      | 2.405332      | 7.310836      | 4.656698      | -0.798511     | 2.036                                     | 37.038                                     | -0.828808                            | 0.186603                             |
| 1236 | 2021-09a | L-neo-vcs    | 4.10         | 0.99                                             | 6.568124      | 6.175677      | 12.502103     | 12.220450     | -1.040900     | 2.941                                     | 40.937                                     | -0.382468                            | 0.638479                             |
| 1237 | 2021-09a | A-ker-C-v    | 3.97         | 0.98                                             | 6.198572      | 7.544048      | 13.501725     | 15.008857     | -1.188803     | 2.496                                     | 42.356                                     | -0.353020                            | 0.668307                             |
| 1238 | 2021-09a | T-san-v      | 3.93         | 0.97                                             | 4.240090      | 5.040791      | 8.991263      | 9.835464      | -1.559079     | 0.497                                     | 39.775                                     | -0.357567                            | 0.663605                             |
| 1239 | 2021-09a | ETH-3        | 4.19         | 0.96                                             | 5.283543      | 2.786345      | 7.789644      | 5.152259      | -1.451988     | 1.695                                     | 37.445                                     | -0.412716                            | 0.607761                             |
| 1240 | 2021-09a | T-gal-4-v-mi | 4.09         | 0.96                                             | 6.381836      | 6.072878      | 12.178634     | 11.991223     | -0.483898     | 2.746                                     | 40.842                                     | -0.410581                            | 0.610017                             |
| 1241 | 2021-09a | A-ker61-vcs  | 4.05         | 0.97                                             | 4.842316      | 6.730655      | 11.311711     | 13.276336     | -1.891830     | 1.078                                     | 41.528                                     | -0.330651                            | 0.690936                             |
| 1242 | 2021-09a | L-uva-vcs    | 3.93         | 0.94                                             | 4.465562      | 7.794133      | 12.101428     | 15.879436     | -2.455138     | 0.631                                     | 42.774                                     | -0.337681                            | 0.683802                             |
| 1243 | 2021-09a | ETH-2        | 4.20         | 0.99                                             | -6.422034     | -14.191833    | -21.278688    | -29.270938    | -2.091553     | -10.174                                   | 19.915                                     | -0.801161                            | 0.213957                             |
| 1244 | 2021-09a | A-ker68-vcs  | 4.02         | 0.97                                             | 5.323178      | 7.127782      | 12.188467     | 14.185604     | -1.203499     | 1.576                                     | 41.943                                     | -0.345385                            | 0.676006                             |
| 1245 | 2021-09a | A-ker52-vcs  | 3.97         | 0.97                                             | 5.720236      | 7.956191      | 13.474687     | 15.915650     | -1.204722     | 2.086                                     | 42.801                                     | -0.354598                            | 0.666709                             |
| 1246 | 2021-09a | M-fra-vcs    | 3.96         | 0.98                                             | 4.863261      | 8.568547      | 13.144672     | 17.191137     | -1.069324     | 1.032                                     | 43.438                                     | -0.334466                            | 0.687079                             |
| 1247 | 2021-09a | ETH-3        | 4.05         | 0.96                                             | 5.296389      | 2.795531      | 7.833707      | 5.203762      | -1.501028     | 1.708                                     | 37.469                                     | -0.391192                            | 0.629547                             |
| 1248 | 2021-09a | SP-74-cs     | 4.06         | 1.00                                             | 7.552751      | 0.202492      | 7.630472      | -0.007205     | -1.252281     | 4.214                                     | 34.784                                     | -0.359835                            | 0.661231                             |
| 1249 | 2021-09a | SP-368-Oa    | 4.08         | 1.01                                             | 9.137850      | 3.782764      | 12.800988     | 7.398396      | -2.688276     | 5.774                                     | 38.484                                     | -0.376448                            | 0.644579                             |
| 1250 | 2021-09a | SP-121-cs    | 4.02         | 1.00                                             | 7.013223      | 2.621693      | 9.468925      | 5.010487      | -2.688276     | 3.548                                     | 37.289                                     | -0.359798                            | 0.661358                             |
| 1251 | 2021-09a | ETH-4        | 4.09         | 1.00                                             | -6.452046     | -14.298029    | -21.183992    | -29.602609    | -2.449508     | -10.202                                   | 19.827                                     | -0.574818                            | 0.443051                             |
| 1252 | 2021-09a | SP-387-Da    | 4.01         | 0.99                                             | 8.299666      | 3.735426      | 11.870171     | 7.287429      | -1.091013     | 4.880                                     | 38.441                                     | -0.392416                            | 0.628397                             |
| 1253 | 2021-09a | SP-29        | 3.92         | 0.99                                             | 7.219881      | 2.627892      | 9.281210      | 5.014311      | -1.521771     | 3.767                                     | 37.331                                     | -0.350240                            | 0.670337                             |
| 1254 | 2021-09a | SP-368-Db    | 3.93         | 0.98                                             | 9.718430      | 4.010128      | 13.635761     | 7.678310      | -1.653945     | 6.410                                     | 38.724                                     | -0.392016                            | 0.628840                             |
| 1255 | 2021-09a | ETH-3        | 4.18         | 0.96                                             | 5.287360      | 2.766614      | 7.797797      | 5.237173      | -2.142560     | 1.700                                     | 37.450                                     | -0.407060                            | 0.613485                             |
| 1256 | 2021-09a | SP-459-Da    | 3.95         | 0.97                                             | 8.185682      | 3.830171      | 7.455231      | 7.269096      | -1.679492     | 4.755                                     | 38.544                                     | -0.393250                            | 0.627552                             |
| 1257 | 2021-09a | SP-254-Da    | 3.89         | 1.00                                             | 8.584440      | 4.044068      | 12.471148     | 7.224201      | -1.299509     | 5.173                                     | 38.766                                     | -0.392252                            | 0.628576                             |
| 1258 | 2021-09a | SP-137-a     | 3.97         | 1.00                                             | 6.039006      | 4.406767      | 10.112224     | 8.555686      | -1.250015     | 2.441                                     | 39.148                                     | -0.473148                            | 0.546646                             |
| 1259 | 2021-09a | ETH-1        | 4.06         | 1.00                                             | 5.592721      | 2.379321      | 7.310085      | 4.284824      | -1.374208     | 2.060                                     | 37.054                                     | -0.806519                            | 0.209163                             |
| 1260 | 2021-09a | SP-1071      | 3.96         | 0.97                                             | 7.094893      | 4.429496      | 11.225032     | 8.647567      | -2.570532     | 3.568                                     | 39.171                                     | -0.476492                            | 0.543385                             |
| 1261 | 2021-09a | SP-1072      | 3.92         | 0.97                                             | 6.872666      | 4.817298      | 11.932259     | 9.410323      | -1.741221     | 3.317                                     | 39.574                                     | -0.463016                            | 0.556929                             |
| 1262 | 2021-09a | SP-1076      | 4.05         | 0.96                                             | 5.178937      | 3.489279      | 8.334509      | 6.748175      | -1.222594     | 1.557                                     | 38.205                                     | -0.453786                            | 0.566204                             |
| 1263 | 2021-09a | ETH-3        | 4.03         | 0.96                                             | 5.281277      | 2.758427      | 7.765126      | 5.188946      | -1.298004     | 1.693                                     | 37.450                                     | -0.407349                            | 0.613192                             |
| 1264 | 2021-09a | BARC-02e     | 4.15         | 0.97                                             | 1.651911      | 2.596606      | 3.764472      | 4.867119      | -1.369256     | -2.177                                    | 37.292                                     | -0.494905                            | 0.524484                             |
| 1265 | 2021-09a | ARD-06       | 3.88         | 0.93                                             | 5.557553      | 2.275511      | 7.585850      | 4.308405      | -2.328680     | 2.006                                     | 36.952                                     | -0.422216                            | 0.598139                             |
| 1266 | 2021-09a | ARD-08       | 3.93         | 0.98                                             | 6.154847      | 2.139266      | 8.029744      | 3.818731      | -1.725079     | 2.649                                     | 36.810                                     | -0.433579                            | 0.586649                             |
| 1267 | 2021-09a | ETH-2        | 4.00         | 0.97                                             | -6.428842     | -14.235154    | -21.337122    | -29.542191    | -2.141923     | -10.180                                   | 19.909                                     | -0.817910                            | 0.197003                             |
| 1268 | 2021-09a | ETH-3        | 3.97         | 0.96                                             | 5.268439      | 2.701794      | 7.688489      | 5.056971      | -1.526538     | 1.682                                     | 37.396                                     | -0.414691                            | 0.605759                             |
| 1269 | 2021-09a | ETH-2        | 3.98         | 0.99                                             | -6.435960     | -14.313290    | -21.408698    | -29.787826    | -2.506730     | -10.185                                   | 19.829                                     | -0.805737                            | 0.209322                             |
| 1270 | 2021-09a | ETH-4        | 3.90         | 0.97                                             | -6.471254     | -14.392153    | -21.305872    | -29.790153    | -2.833755     | -10.219                                   | 19.749                                     | -0.585510                            | 0.432924                             |
| 1271 | 2021-09a | ETH-1        | 4.04         | 0.99                                             | 5.581618      | 2.332558      | 7.246197      | 4.166898      | -1.570863     | 2.030                                     | 37.015                                     | -0.812681                            | 0.202292                             |
| 1272 | 2021-09b | ETH-1        | 3.88         | 1.02                                             | 5.598753      | 2.510931      | 7.449037      | 4.578189      | -1.015499     | 2.033                                     | 37.046                                     | -0.803857                            | 0.210210                             |
| 1273 | 2021-09b | ETH-2        | 4.00         | 1.00                                             | -6.419589     | -14.151853    | -21.223698    | -29.549051    | -2.902192     | -10.172                                   | 19.863                                     | -0.794722                            | 0.218900                             |
| 1274 | 2021-09b | ETH-3        | 3.95         | 0.97                                             | 5.283803      | 2.839768      | 7.842389      | 5.352725      | -1.389419     | 1.685                                     | 37.425                                     | -0.413023                            | 0.610833                             |
| 1275 | 2021-09b | ETH-4        | 3.89         | 1.01                                             | -6.455938     | -14.260555    | -21.158899    | -29.527654    | -2.186313     | -10.207                                   | 19.775                                     | -0.578026                            | 0.441020                             |
| 1276 | 2021-09b | ETH-1        | 4.02         | 1.01                                             | 5.590794      | 2.421543      | 7.343304      | 4.319884      | -1.322802     | 2.028                                     | 37.013                                     | -0.812972                            | 0.200864                             |
| 1277 | 2021-09b | ETH-2        | 3.91         | 1.01                                             | -6.418698     | -14.158590    | -21.240338    | -29.501983    | -2.153332     | -10.171                                   | 19.898                                     | -0.805921                            | 0.207421                             |
| 1278 | 2021-09b | ETH-3        | 3.97         | 0.97                                             | 5.301197      | 2.839524      | 7.864986      | 5.310717      | -1.577173     | 1.703                                     | 37.457                                     | -0.408214                            | 0.615762                             |
| 1279 | 2021-09b | ETH-4        | 4.04         | 1.01                                             | -6.457640     | -14.298360    | -21.193291    | -29.785220    | -2.150823     | -10.208                                   | 19.764                                     | -0.578178                            | 0.440864                             |
| 1280 | 2021-09b | M-fra-vcs    | 3.88         | 0.97                                             | 4.814079      | 8.584046      | 13.116795     | 17.326991     | -2.550109     | 0.971                                     | 43.408                                     | -0.326591                            | 0.699551                             |
| 1281 | 2021-09b | T-gal-4-v-mi | 4.14         | 1.01                                             | 6.389767      | 6.033780      | 12.156434     | 12.105243     | -1.046842     | 2.747                                     | 40.769                                     | -0.402439                            | 0.621783                             |
| 1282 | 2021-09b | A-ker52-vcs  | 3.98         | 0.98                                             | 5.791115      | 7.993358      | 13.515978     | 16.077569     | -1.204538     | 2.035                                     | 42.801                                     | -0.359418                            | 0.659192                             |
| 1283 | 2021-09b | ETH-3        | 3.95         | 0.98                                             | 5.304413      | 2.802728      | 7.832356      | 5.339378      | -1.251882     | 1.708                                     | 37.436                                     | -0.407815                            | 0.616171                             |
| 1284 | 2021-09b | T-san-v      | 4.06         | 0.96                                             | 4.284803      | 5.089688      | 9.082811      | 10.030757     | -1.113860     | 0.535                                     | 39.806                                     | -0.360603                            | 0.664594                             |
| 1285 | 2021-09b | A-ker68-vcs  | 4.06         | 0.98                                             | 5.364889      | 7.193788      | 12.308733     | 14.478298     | -1.565230     | 1.610                                     | 41.981                                     | -0.333815                            | 0.692128                             |
| 1286 | 2021-09b | A-ker-C-v    | 3.97         | 0.98                                             | 6.218241      | 7.563385      | 13.530498     | 15.005748     | -1.197200     | 2.507                                     | 42.364                                     | -0.363662                            | 0.661563                             |
| 1287 | 2021-09b | ETH-1        | 4.04         | 1.00                                             | 5.599126      | 2.413001      | 7.351852      | 4.384758      | -0.762645     | 2.037                                     | 37.040                                     | -0.804663                            | 0.209381                             |
| 1288 | 2021-09b | FSL-707721   | 3.99         | 0.98                                             | 4.840725      | 4.095406      | 8.615024      | 7.956987      | -1.174691     | 1.165                                     | 38.784                                     | -0.422135                            | 0.601511                             |
| 1289 | 2021-09b | FSL-307829b  | 4.02         | 1.00                                             | 4.709339      | 2.645590      | 6.820230      | 4.571544      | -1.068958     | 1.085                                     | 37.100                                     | -0.471114                            | 0.551264                             |
| 1290 | 2021-09b | N-len-mi     | 4.03         | 0.94                                             | 4.847189      | 5.107452      | 9.689346      | 10.116542     | -1.604114     | 1.135                                     | 39.833                                     | -0.354663                            | 0.670696                             |
| 1291 | 2021-09b | ETH-3        | 3.90         | 0.98                                             | 5.295809      | 2.800818      | 7.823150      | 5.210376      | -2.153393     | 1.699                                     | 37.448                                     | -0.406248                            | 0.617777                             |
| 1292 | 2021-09b | SP-254-Da    | 3.96         | 0.99                                             | 8.621602      | 4.088690      | 12.561779     | 8.139033      | -1.563710     | 5.200                                     | 38.773                                     | -0.384445                            | 0.640236                             |
| 1293 | 2021-09b | SP-74-cs     | 3.95         | 0.97                                             | 7.557361      | 0.174821      | 7.608416      | -0.090933     | -2.200184     | 4.209                                     | 34.729                                     | -0.359287                            | 0.665907                             |
| 1294 | 2021-09b | SP-459-Da    | 4.02         | 0.97                                             | 8.086323      | 3.887913      | 11.796067     | 7.573715      | -1.383445     | 4.636                                     | 38.569                                     | -0.396727                            | 0.627629                             |
| 1295 | 2021-09b | ETH-2        | 3.91         | 0.97                                             | -6.409679     | -14.210884    | -21.273504    | -29.746705    | -2.706126     | -10.160                                   | 19.885                                     | -0.797028                            | 0.216536                             |
| 1296 | 2021-09b | SP-368-Oa    | 4.06         | 0.99                                             |               |               |               |               |               |                                           |                                            |                                      |                                      |

| UID  | Session  | Sample       | Mass<br>(mg) | CO <sub>2</sub> yield<br>(if CaCO <sub>3</sub> ) | δ45<br>(‰ WG) | δ46<br>(‰ WG) | δ47<br>(‰ WG) | δ48<br>(‰ WG) | δ49<br>(‰ WG) | δ <sup>13</sup> C <sub>VPDB</sub><br>(‰) | δ <sup>18</sup> O <sub>VSMOW</sub><br>(‰) | Δ <sub>carb</sub> <sup>carb</sup><br>(‰) | Δ <sub>org</sub> <sup>org</sup><br>(‰) |
|------|----------|--------------|--------------|--------------------------------------------------|---------------|---------------|---------------|---------------|---------------|------------------------------------------|-------------------------------------------|------------------------------------------|----------------------------------------|
| 1334 | 2021-09c | SP-74-cs     | 3.93         | 0.99                                             | 7.550775      | 0.127552      | 7.551040      | -0.152486     | -1.338662     | 4.211                                    | 34.681                                    | -0.363022                                | 0.665420                               |
| 1335 | 2021-09c | ARD-06       | 4.05         | 0.96                                             | 5.523609      | 2.338802      | 7.563385      | 4.328031      | -1.411278     | 1.964                                    | 36.975                                    | -0.443964                                | 0.582715                               |
| 1336 | 2021-09c | T-gal-4-v-mi | 3.90         | 1.01                                             | 6.396143      | 6.026673      | 12.136427     | 12.111332     | -2.152122     | 2.759                                    | 40.790                                    | -0.421790                                | 0.605270                               |
| 1337 | 2021-09c | ETH-1        | 4.04         | 1.01                                             | 5.594262      | 2.381659      | 7.295646      | 4.276241      | -1.509354     | 2.037                                    | 37.025                                    | -0.824714                                | 0.193679                               |
| 1338 | 2021-09c | A-ker-A-d    | 4.04         | 0.97                                             | 5.594290      | 7.378344      | 12.710705     | 14.951452     | -0.379382     | 1.852                                    | 42.195                                    | -0.352320                                | 0.676240                               |
| 1339 | 2021-09c | A-ker52-vcs  | 3.94         | 0.99                                             | 5.779567      | 7.973362      | 13.482202     | 16.167075     | -1.496606     | 2.028                                    | 42.812                                    | -0.361396                                | 0.666948                               |
| 1340 | 2021-09c | SP-459-Da    | 3.96         | 0.94                                             | 8.194321      | 3.896879      | 11.918466     | 7.581473      | -2.483598     | 4.758                                    | 38.593                                    | -0.395054                                | 0.632593                               |
| 1341 | 2021-09c | ETH-3        | 4.05         | 0.97                                             | 5.296404      | 2.784738      | 7.788030      | 5.538923      | -1.205987     | 1.704                                    | 37.451                                    | -0.425934                                | 0.601132                               |
| 1342 | 2021-09c | ARD-08       | 4.01         | 0.97                                             | 6.135623      | 2.193392      | 8.073260      | 4.120649      | -1.948699     | 2.623                                    | 36.840                                    | -0.423809                                | 0.603298                               |
| 1343 | 2021-09c | T-san-v      | 4.03         | 0.97                                             | 4.260588      | 5.017939      | 8.981297      | 10.038992     | -1.109042     | 0.515                                    | 39.767                                    | -0.366146                                | 0.662196                               |
| 1344 | 2021-09c | SP-368-Oa    | 3.92         | 0.99                                             | 9.149284      | 3.802930      | 12.839405     | 7.515151      | -2.146164     | 5.782                                    | 38.501                                    | -0.369963                                | 0.658210                               |
| 1345 | 2021-09c | ETH-2        | 4.01         | 0.98                                             | -6.423031     | -14.265334    | -21.350419    | -30.168062    | -2.475973     | -10.179                                  | 19.857                                    | -0.809234                                | 0.210137                               |
| 1346 | 2021-09c | N-len-mi     | 4.02         | 0.97                                             | 4.853840      | 5.058304      | 9.644326      | 9.969534      | -1.374197     | 1.147                                    | 39.813                                    | -0.358005                                | 0.670500                               |
| 1347 | 2021-09c | A-ker68-vcs  | 3.94         | 0.95                                             | 5.301499      | 7.136017      | 12.173811     | 14.331476     | -2.297405     | 1.549                                    | 41.962                                    | -0.345655                                | 0.683062                               |
| 1348 | 2021-09c | SP-368-Db    | 3.98         | 0.99                                             | 9.911856      | 4.042526      | 13.835646     | 7.843513      | -1.712147     | 6.588                                    | 38.753                                    | -0.400650                                | 0.626833                               |
| 1349 | 2021-09c | ETH-3        | 4.01         | 0.94                                             | 5.314260      | 2.807505      | 7.845754      | 5.272565      | -2.019156     | 1.723                                    | 37.487                                    | -0.409312                                | 0.618116                               |
| 1350 | 2021-09c | A-ker61-vcs  | 4.01         | 0.98                                             | 5.229035      | 6.903046      | 11.862587     | 13.983370     | -0.942068     | 1.480                                    | 41.724                                    | -0.351364                                | 0.677236                               |
| 1351 | 2021-09c | A-ker-C-v    | 3.94         | 0.98                                             | 6.205659      | 7.523503      | 13.471359     | 15.099906     | -0.688872     | 2.500                                    | 42.365                                    | -0.370195                                | 0.657959                               |
| 1352 | 2021-09c | SP-121-cs    | 4.02         | 0.99                                             | 6.979770      | 2.524771      | 9.334672      | 4.733135      | -1.279653     | 3.512                                    | 37.195                                    | -0.364679                                | 0.663687                               |
| 1353 | 2021-09c | ETH-4        | 3.91         | 1.00                                             | -6.453855     | -14.326438    | -21.209115    | -30.264870    | -2.613515     | -10.210                                  | 19.802                                    | -0.570275                                | 0.454297                               |
| 1354 | 2021-09c | L-neo-vcs    | 4.02         | 0.98                                             | 6.522149      | 6.155921      | 12.391470     | 12.204694     | -1.946994     | 2.890                                    | 40.933                                    | -0.405764                                | 0.621640                               |
| 1355 | 2021-09c | L-uva-vcs    | 4.02         | 0.94                                             | 4.475347      | 7.904126      | 12.090615     | 16.063660     | -1.747088     | 0.638                                    | 42.767                                    | -0.329148                                | 0.699930                               |
| 1356 | 2021-09c | SP-387-Da    | 3.95         | 0.99                                             | 8.383722      | 3.767459      | 11.980575     | 7.240731      | -1.600644     | 4.966                                    | 38.481                                    | -0.400679                                | 0.626844                               |
| 1357 | 2021-09c | ETH-3        | 3.95         | 0.96                                             | 5.280824      | 2.754166      | 7.750268      | 5.236266      | -2.023173     | 1.689                                    | 37.442                                    | -0.417447                                | 0.609805                               |
| 1358 | 2021-09c | N-len-mi     | 4.02         | 0.93                                             | 4.826245      | 5.111722      | 9.658551      | 10.055672     | -2.215022     | 1.116                                    | 39.881                                    | -0.367833                                | 0.660458                               |
| 1359 | 2021-09c | A-ker-A-d    | 3.95         | 0.98                                             | 5.553245      | 7.345958      | 12.640968     | 14.845850     | -1.246702     | 1.810                                    | 42.191                                    | -0.347467                                | 0.681200                               |
| 1360 | 2021-09c | SP-29        | 3.95         | 0.99                                             | 7.205093      | 2.702324      | 9.752408      | 5.256509      | -1.052997     | 3.746                                    | 37.386                                    | -0.354613                                | 0.673963                               |
| 1361 | 2021-09c | ETH-1        | 3.90         | 1.01                                             | 5.592789      | 2.360939      | 7.287098      | 4.241866      | -1.724123     | 2.037                                    | 37.037                                    | -0.811378                                | 0.207306                               |
| 1362 | 2021-09c | T-gal-4-v-mi | 3.95         | 1.01                                             | 6.386947      | 5.974522      | 12.083521     | 12.042885     | -1.575225     | 2.751                                    | 40.773                                    | -0.413672                                | 0.613566                               |
| 1363 | 2021-09c | A-ker-C-v    | 3.88         | 0.98                                             | 6.205637      | 7.558025      | 13.518464     | 15.279560     | -2.044398     | 2.499                                    | 42.412                                    | -0.357386                                | 0.671046                               |
| 1364 | 2021-09c | A-ker61-vcs  | 3.91         | 0.98                                             | 5.101067      | 6.807811      | 11.639900     | 13.662415     | -2.377321     | 1.347                                    | 41.639                                    | -0.347127                                | 0.681570                               |
| 1365 | 2021-09c | ETH-3        | 4.02         | 0.97                                             | 5.288252      | 2.768861      | 7.782220      | 5.379299      | -1.679462     | 1.696                                    | 37.463                                    | -0.407776                                | 0.619687                               |
| 1366 | 2021-09c | ETH-2        | 3.97         | 0.98                                             | -6.432348     | -14.293823    | -21.396611    | -30.415625    | -3.022405     | -10.188                                  | 19.847                                    | -0.816546                                | 0.202667                               |
| 1367 | 2021-09c | ETH-4        | 3.91         | 1.00                                             | -6.467559     | -14.374145    | -21.271207    | -30.491266    | -2.620589     | -10.223                                  | 19.764                                    | -0.571897                                | 0.452641                               |
| 1368 | 2021-09c | ETH-3        | 4.02         | 0.96                                             | 5.284448      | 2.744136      | 7.752407      | 5.125557      | -1.864567     | 1.693                                    | 37.439                                    | -0.409212                                | 0.618220                               |
| 1369 | 2021-09c | ETH-1        | 4.08         | 1.00                                             | 5.588011      | 2.347344      | 7.271754      | 4.390988      | -0.961334     | 2.032                                    | 37.029                                    | -0.808375                                | 0.210374                               |
| 1246 | 2022-03c | ETH-1        | 3.77         | 0.97                                             | 5.589121      | 1.903381      | 6.929905      | 3.989962      | -2.981285     | 2.039                                    | 37.033                                    | -0.713500                                | 0.214448                               |
| 1247 | 2022-03c | ETH-3        | 3.88         | 0.95                                             | 5.300699      | 2.263184      | 7.367497      | 4.790696      | -3.005001     | 1.717                                    | 37.433                                    | -0.336300                                | 0.608930                               |
| 1248 | 2022-03c | ETH-2        | 3.85         | 1.00                                             | -6.346757     | -14.624124    | -21.535412    | -34.308313    | -1.004150     | -10.143                                  | 19.895                                    | -0.717863                                | 0.213395                               |
| 1249 | 2022-03c | ETH-3        | 4.27         | 0.97                                             | 5.286059      | 2.216156      | 7.314336      | 4.849568      | 0.341553      | 1.703                                    | 37.423                                    | -0.327919                                | 0.617703                               |
| 1250 | 2022-03c | 707752       | 3.93         | 0.98                                             | 4.971271      | 3.090737      | 7.819989      | 6.974956      | 0.383459      | 1.333                                    | 38.344                                    | -0.360553                                | 0.583507                               |
| 1251 | 2022-03c | 707729       | 4.10         | 0.97                                             | 5.142577      | 3.854772      | 8.768854      | 8.705469      | -0.041709     | 1.488                                    | 39.150                                    | -0.343914                                | 0.600793                               |
| 1252 | 2022-03c | 707727       | 4.01         | 1.01                                             | 5.988755      | 3.757690      | 9.551367      | 8.489111      | -0.235936     | 2.399                                    | 39.056                                    | -0.341546                                | 0.603174                               |
| 1253 | 2022-03c | ETH-1        | 3.89         | 1.00                                             | 5.579995      | 1.828055      | 6.825711      | 3.973428      | -0.756994     | 2.032                                    | 37.054                                    | -0.733684                                | 0.193349                               |
| 1254 | 2022-03c | L-opa        | 3.93         | 0.97                                             | 4.536625      | 1.583672      | 5.838008      | 3.147197      | -0.163287     | 0.923                                    | 36.808                                    | -0.404543                                | 0.537740                               |
| 1255 | 2022-03c | ETH-3        | 4.21         | 0.97                                             | 5.274137      | 2.167268      | 7.244214      | 4.767833      | 0.443148      | 1.692                                    | 37.439                                    | -0.337336                                | 0.607862                               |
| 1256 | 2022-03c | H9           | 3.99         | 0.99                                             | 1.673597      | 0.740442      | 2.074646      | 1.452197      | -0.473230     | -2.116                                   | 35.967                                    | -0.380412                                | 0.563444                               |
| 1257 | 2022-03c | ETH-3        | 4.11         | 0.97                                             | 5.281292      | 2.177453      | 7.260496      | 4.746032      | -0.332457     | 1.699                                    | 37.458                                    | -0.338506                                | 0.606637                               |
| 1258 | 2022-03c | FSL-707721   | 4.25         | 1.00                                             | 4.817509      | 3.402552      | 7.984425      | 6.905456      | -0.052392     | 1.156                                    | 38.737                                    | -0.345128                                | 0.599621                               |
| 1259 | 2022-03c | VR-121S      | 3.94         | 0.97                                             | 8.870869      | 3.626318      | 12.469933     | 8.229912      | 0.498582      | 5.494                                    | 38.963                                    | -0.277295                                | 0.670018                               |
| 1260 | 2022-03c | VR-111S      | 4.19         | 0.99                                             | 10.848169     | 2.637754      | 13.493169     | 5.842854      | 0.184810      | 7.652                                    | 37.930                                    | -0.317803                                | 0.627522                               |
| 1261 | 2022-03c | ETH-2        | 3.91         | 1.00                                             | -6.400936     | -14.762393    | -21.730424    | -34.767736    | -0.706268     | -10.196                                  | 19.848                                    | -0.722962                                | 0.208085                               |
| 1262 | 2022-03c | VR-81S       | 3.96         | 0.97                                             | 9.282384      | 2.587698      | 11.891116     | 5.664219      | 0.960949      | 5.974                                    | 37.885                                    | -0.322891                                | 0.622407                               |
| 1263 | 2022-03c | VR-110S-1    | 4.19         | 0.97                                             | 7.920762      | 3.243463      | 11.063861     | 7.225267      | 0.205263      | 4.490                                    | 38.573                                    | -0.319942                                | 0.625585                               |
| 1264 | 2022-03c | VR-63S-1     | 4.30         | 0.99                                             | 8.810152      | 1.601369      | 10.355868     | 3.464542      | 0.116041      | 5.505                                    | 36.863                                    | -0.319572                                | 0.626059                               |
| 1265 | 2022-03c | ETH-3        | 3.90         | 0.97                                             | 5.288015      | 2.183958      | 7.294409      | 4.853545      | 0.575620      | 1.706                                    | 37.479                                    | -0.318126                                | 0.627948                               |
| 1266 | 2022-03c | VR-26S-D2    | 4.20         | 0.99                                             | 11.319249     | 2.975585      | 14.309898     | 6.632321      | 0.200855      | 8.144                                    | 38.291                                    | -0.324085                                | 0.620851                               |
| 1267 | 2022-03c | VR-104S      | 4.06         | 0.96                                             | 7.774732      | 2.015142      | 9.686738      | 4.457448      | 0.173136      | 4.379                                    | 37.300                                    | -0.328904                                | 0.616381                               |
| 1268 | 2022-03c | VR-100S      | 4.28         | 0.99                                             | 9.240377      | 2.033092      | 11.229745     | 4.535926      | 1.273833      | 5.950                                    | 37.316                                    | -0.318551                                | 0.627019                               |
| 1269 | 2022-03c | ETH-1        | 3.81         | 1.00                                             | 5.580546      | 1.748345      | 6.758570      | 3.681277      | 0.151790      | 2.036                                    | 37.030                                    | -0.722714                                | 0.204832                               |
| 1270 | 2022-03c | H7           | 4.06         | 0.94                                             | 3.196315      | 1.799886      | 4.681232      | 4.011661      | 1.038691      | -0.523                                   | 37.090                                    | -0.390151                                | 0.552936                               |
| 1271 | 2022-03c | VR-59S-1     | 4.28         | 0.99                                             | 9.446352      | 2.284359      | 11.694483     | 4.938830      | 0.752455      | 6.161                                    | 37.581                                    | -0.316103                                | 0.629522                               |
| 1272 | 2022-03c | VR-55S       | 4.12         | 0.98                                             | 10.252583     | 1.740797      | 11.977651     | 3.824680      | -0.012105     | 7.046                                    | 37.014                                    | -0.326328                                | 0.618792                               |
| 1273 | 2022-03c | ETH-3        | 3.96         | 0.96                                             | 5.276395      | 2.133510      | 7.220606      | 4.651154      | 0.074507      | 1.695                                    | 37.435                                    | -0.329975                                | 0.615564                               |
| 1274 | 2022-03c | VR-103S      | 4.27         | 0.82                                             | 10.900126     | 2.823715      | 13.757011     | 6.260376      | 4.162344      | 7.700                                    | 38.142                                    | -0.292885                                | 0.653553                               |
| 1308 | 2022-03c | ETH-1        | 3.98         | 1.00                                             | 5.581682      | 1.868731      | 6.883760      | 3.501770      | -1.558796     | 2.037                                    | 36.996                                    | -0.717689                                | 0.208006                               |
| 1309 | 2022-03c | ETH-3        | 3.89         | 0.97                                             | 5.296194      | 2.311661      | 7.426607      | 4.451753      | -1.144330     | 1.715                                    | 37.474                                    | -0.320557                                | 0.621325                               |
| 1310 | 2022-03c | ETH-2        | 4.00         | 1.00                                             | -6.406484     | -14.715891    | -21.676919    | -30.514039    | -1.434261     | -10.165                                  | 19.894                                    | -0.708921                                | 0.192441                               |
| 1311 | 2022-03c | ETH-3        | 3.91         | 0.97                                             | 5.278441      | 2.245584      | 7.322032      | 4.332022      | -1.247463     | 1.698                                    | 37.440                                    | -0.341324                                | 0.606862                               |
| 1312 | 2022-03c | VR-61S       | 4.04         | 0.99                                             | 9.690103      | 1.798667      | 11.480773     | 3.457844      | -1.081632     | 6.433                                    | 36.978                                    | -0.299809                                | 0.648030                               |
| 1313 | 2022-03c | VR-108S      | 4.03         | 1.01                                             | 9.538131      | 2.459579      | 11.996850     | 4.863418      | -1.038189     | 6.244                                    | 37.708                                    | -0.318532                                | 0.629557                               |
| 1314 | 2022-03c | VR-80S       | 4.06         | 1.00                                             | 8.822271      | 3.897965      | 12.657252     | 7.663196      | -1.516484     | 5.427                                    | 39.169                                    | -0.308688                                | 0.640877                               |
| 1315 | 2022-03c | ETH-1        | 4.09         | 1.00                                             | 5.578316      | 1.813804      |               |               |               |                                          |                                           |                                          |                                        |

| UID  | Session  | Sample    | Mass<br>(mg) | CO <sub>2</sub> yield<br>(if CaCO <sub>3</sub> ) | $\delta^{45}$<br>(‰ WG) | $\delta^{46}$<br>(‰ WG) | $\delta^{47}$<br>(‰ WG) | $\delta^{48}$<br>(‰ WG) | $\delta^{49}$<br>(‰ WG) | $\delta^{13}\text{C}_{\text{VPDB}}$<br>(‰) | $\delta^{18}\text{O}_{\text{VSMOW}}$<br>(‰) | $\Delta_{47}^{\text{SW}}$<br>(‰) | $\Delta_{47}^{\text{AS}}$<br>(‰) |
|------|----------|-----------|--------------|--------------------------------------------------|-------------------------|-------------------------|-------------------------|-------------------------|-------------------------|--------------------------------------------|---------------------------------------------|----------------------------------|----------------------------------|
| J353 | 2022-03e | VR-110S-1 | 3.93         | 0.96                                             | 7.890207                | 3.242299                | 11.027582               | 6.577984                | -0.276648               | 4.454                                      | 38.557                                      | -0.323408                        | 0.643963                         |
| J354 | 2022-03e | ETH-2     | 3.96         | 0.99                                             | -6.423062               | -14.859918              | -21.832757              | -31.501732              | -1.410320               | -10.177                                    | 19.851                                      | -0.707286                        | 0.216356                         |
| J355 | 2022-03e | VR-81S    | 3.97         | 0.98                                             | 9.640267                | 2.801261                | 12.381966               | 5.656340                | -0.541300               | 6.342                                      | 38.098                                      | -0.341874                        | 0.627015                         |
| J356 | 2022-03e | VR-100S   | 4.03         | 0.98                                             | 9.224808                | 2.042735                | 11.187861               | 3.926022                | -1.217207               | 5.926                                      | 37.314                                      | -0.353505                        | 0.614370                         |
| J357 | 2022-03e | VR-103S   | 4.30         | 0.82                                             | 10.925407               | 2.774291                | 13.679362               | 5.515150                | -0.174989               | 7.717                                      | 38.068                                      | -0.346792                        | 0.624085                         |
| J358 | 2022-03e | ETH-3     | 3.94         | 0.96                                             | 5.279017                | 2.194732                | 7.262622                | 4.311697                | 0.052807                | 1.701                                      | 37.481                                      | -0.351004                        | 0.614451                         |

## References

- Anderson, N. T., Kelson, J. R., Kele, S., Daëron, M., Bonifacie, M., Horita, J., Mackey, T. J., John, C. M., Kluge, T., Petschnig, P., Jost, A. B., Huntington, K. W., Bernasconi, S. M. & Bergmann, K. D. (2021). A Unified Clumped Isotope Thermometer Calibration (0.5–1,100 °C) Using Carbonate-Based Standardization. *Geophysical Research Letters* 48:(7). doi: [10.1029/2020gl092069](https://doi.org/10.1029/2020gl092069).
- Bernasconi, S. M., Daëron, M., Bergmann, K. D., Bonifacie, M., Meckler, A. N., Affek, H. P., Anderson, N., Bajnai, D., Barkan, E., Beverly, E., Blamart, D., Burgener, L., Calmels, D., Chaduteau, C., Clog, M., Davidheiser-Kroll, B., Davies, A., Dux, F., Eiler, J., Elliot, B., Fetrow, A. C., Fiebig, J., Goldberg, S., Hermoso, M., Huntington, K. W., Hyland, E., Ingalls, M., Jaggi, M., John, C. M., Jost, A. B., Katz, S., Kelson, J., Kluge, T., Kocken, I. J., Laskar, A., Leutert, T. J., Liang, D., Lucarelli, J., Mackey, T. J., Mangenot, X., Meinicke, N., Modestou, S. E., Müller, I. A., Murray, S., Neary, A., Packard, N., Passey, B. H., Pelletier, E., Petersen, S., Piasecki, A., Schauer, A., Snell, K. E., Swart, P. K., Tripathi, A., Upadhyay, D., Vennemann, T., Winkelstern, I., Yarian, D., Yoshida, N., Zhang, N. & Ziegler, M. (2021). InterCarb: A community effort to improve inter-laboratory standardization of the carbonate clumped isotope thermometer using carbonate standards. *Geochemistry, Geophysics, Geosystems* 22:(5). doi: [10.1029/2020GC009588](https://doi.org/10.1029/2020GC009588).
- Bernasconi, S. M., Müller, I. A., Bergmann, K. D., Breitenbach, S. F. M., Fernandez, A., Hodell, D. A., Meckler, A. N., Millan, I. & Ziegler, M. (2018). Reducing uncertainties in carbonate clumped isotope analysis through consistent carbonate-based standardization. *Geochemistry, Geophysics, Geosystems* 19. doi: [10.1029/2017GC007385](https://doi.org/10.1029/2017GC007385).
- Brand, W. A., Assonov, S. S. & Coplen, T. B. (2010). Correction for the  $^{17}\text{O}$  interference in  $\delta(^{13}\text{C})$  measurements when analyzing  $\text{CO}_2$  with stable isotope mass spectrometry (IUPAC Technical Report). *Pure and Applied Chemistry* 82:(8), pp. 1719–1733. doi: [10.1351/PAC-REP-09-01-05](https://doi.org/10.1351/PAC-REP-09-01-05).
- Daëron, M. (2021). Full propagation of analytical uncertainties in  $\Delta_{47}$  measurements. *Geochemistry, Geophysics, Geosystems* 22:(5). doi: [10.1029/2020gc009592](https://doi.org/10.1029/2020gc009592).
- Daëron, M., Blamart, D., Peral, M. & Affek, H. P. (2016). Absolute isotopic abundance ratios and the accuracy of  $\Delta_{47}$  measurements. *Chemical Geology* 442, pp. 83–96. doi: [10.1016/j.chemgeo.2016.08.014](https://doi.org/10.1016/j.chemgeo.2016.08.014).
- Daëron, M., Drysdale, R. N., Peral, M., Huyghe, D., Blamart, D., Coplen, T. B., Lartaud, F. & Zanchetta, G. (2019). Most Earth-surface calcites precipitate out of isotopic equilibrium. *Nature Communications* 10:(1), pp. 429. doi: [10.1038/s41467-019-08336-5](https://doi.org/10.1038/s41467-019-08336-5).
- Fiebig, J., Daëron, M., Bernecker, M., Guo, W., Schneider, G., Boch, R., Bernasconi, S. M., Jautzy, J. & Dietzel, M. (2021). Calibration of the dual clumped isotope thermometer for carbonates. *Geochimica et Cosmochimica Acta* 312, pp. 235–256. doi: [10.1016/j.gca.2021.07.012](https://doi.org/10.1016/j.gca.2021.07.012).
- Huyghe, D., Daëron, M., Rafelis, M. de, Blamart, D., Sébilo, M., Paulet, Y.-M. & Lartaud, F. (2022). Clumped isotopes in modern marine bivalves. *Geochimica et Cosmochimica Acta* 316, pp. 41–58. doi: [10.1016/j.gca.2021.09.019](https://doi.org/10.1016/j.gca.2021.09.019).
- Jautzy, J. J., Savard, M. M., Dhillon, R. S., Bernasconi, S. M. & Smirnov, A. (2020). Clumped isotope temperature calibration for calcite: Bridging theory and experimentation. *Geochemical Perspectives Letters*, pp. 36–41. doi: [10.7185/geochemlet.2021](https://doi.org/10.7185/geochemlet.2021).
- Kim, S.-T., Mucci, A. & Taylor, B. E. (2007). Phosphoric acid fractionation factors for calcite and aragonite between 25 and 75 °C: Revisited. *Chemical Geology* 246:(3-4), pp. 135–146. doi: [10.1016/j.chemgeo.2007.08.005](https://doi.org/10.1016/j.chemgeo.2007.08.005).
- Kim, S.-T. & O'Neil, J. R. (1997). Equilibrium and nonequilibrium oxygen isotope effects in synthetic carbonates. *Geochimica et Cosmochimica Acta* 61:(16), pp. 3461–3475. doi: [10.1016/s0016-7037\(97\)00169-5](https://doi.org/10.1016/s0016-7037(97)00169-5).
- Peral, M., Daëron, M., Blamart, D., Bassinot, F., Dewilde, F., Smialkowski, N., Isguder, G., Bonnin, J., Jorissen, F., Kissel, C., Michel, E., Vázquez Riveiros, N. & Waelbroeck, C. (2018). Updated calibration of the clumped isotope thermometer in planktonic and benthic foraminifera. *Geochimica et Cosmochimica Acta* 239, pp. 1–16. doi: [10.1016/j.gca.2018.07.016](https://doi.org/10.1016/j.gca.2018.07.016).
