# Supplementary material for: Multi-proxy assessment of brachiopod shell calcite as a potential archive of seawater temperature and oxygen isotope composition
Source: Copernicus journal article supplement (doi:10.5194/bg-20-1381-2023), 2023-04-12
Supplement: Supplementary file 3 [file S3 Brachiopod clumped isotope data.xlsx]

## Sheet: Description
Env. and bio. Parameters sheet
List of samples with environmental parameters (location, temperature, salinity, ocean geochemistry) and taxonomic identification of the shells
Geochemical data sheet
List of samples with isotope geochemistry results
Clumped isotope results are displayed in the former CDES 25 and CDES 90 reference frames for samples not anchored to the new I-CDES reference frame (Bernasconi et al., 2021).
Data in the I-CDES reference frame can be compared at first order with data in the CDES 90 reference frame.
Equation comparison
Taxonomic group, environment temperature constrain and clumped isotope result in CDES 90 or I-CDES reference frames
Clumped isotope temperature calculated with different temperature equations in the I-CDES reference frame, and associated offset relative to environment temperature constrains. Bold = significant deviation
T offset per dataset
Mean temperature offset and number of data with significant temperature offset when applying the different equations to the brachiopod dataset or to different subsamples (Taxonomic group or studies).
Correspondance table
Sample name in study	Sample name in D47 analysis reports
WB5	T-san-v
WB6	L-neo-vcs
WB8	N-nig
MFRA-CEA	M-fra-vcs
LUVA-PAL	L-uva-vcs
WB4A	A-ker-C-v
WB4B	A-ker-A-d
AKER-52	A-ker52-vcs
AKER-68	A-ker68-vcs
AKER-61	A-ker61-vcs
SCRO-1	Scro_1_v
SGLO-M2	Sglo_M2_v
SGLO-M2*	Sglo_M2_v_cp
TGAL-4	T-gal-4-v-mi
TGAL-3	Tgal_3_v
TCUB-2*	Tcub_2_v
TPLI-2	Tpli_2_v
TDES-G1	Tdes_g1_v
TDES-B2	Tdes_b2_v

## Sheet: Env. and bio. parameters
Sample	Source	Identification	Order	Suborder (for terebratulida)	Geographic location	MAT (°C)	max T (°C)	min T (°C)	Salinity	d18Osw database	d18Osw measured
130	Bajnai et al., 2018	Magellania venosa	Terebratulida	Terebratellidina	Chile	11.36	13.19	9.77	32.547	-0.63872	-1.21
143	Bajnai et al., 2018	Magellania venosa	Terebratulida	Terebratellidina	Chile	11.36	13.19	9.77	32.547	-0.63872	-1.21
ChHP1	Bajnai et al., 2018	Hemithiris psittacea	Rhynchonellida		Hudson	1.56	3.2	-1.05	31.765	-2.7087	-3.35
D487L	Bajnai et al., 2018	Terebratalia transversa	Terebratulida	Terebratellidina	San Juan	8.59	9.62	7.7	31.087	-1.45172	-1.84
S006L	Bajnai et al., 2018	Terebratalia transversa	Terebratulida	Terebratellidina	San Juan	8.39	8.94	7.87	31.72	-1.1732	-1.84
PA.01	Bajnai et al., 2018	Pajaudina atlantica	Thecideida		Canary	20.92	23.24	19.01	36.837	0.91555	1.07
TC.01	Bajnai et al., 2018	Thecidellina congregata	Thecideida		Palau	28.914	29.37	27.85	34.066	0.31782	-0.13
DA5.25.1	Bajnai et al., 2018	Argyrotheca sp.	Terebratulida	Terebratellidina	Egypt	24.84	28.19	21.83	40.355	1.70005	1.86
DA5.25.2	Bajnai et al., 2018	Megerlia sp.	Terebratulida	Terebratellidina	Egypt	24.84	28.19	21.83	40.355	1.70005	1.86
DS288L	Bajnai et al., 2018	Terebratella sanguinea	Terebratulida	Terebratellidina	New Zealand	13.27	15.44	11.68	34.811	0.37495	0.3
DS420L	Bajnai et al., 2018	Calloria inconspicua	Terebratulida	Terebratellidina	New Zealand	13.27	15.44	11.68	34.811	0.37495	0.3
DS430L	Bajnai et al., 2018	Liothyrella neozelanica	Terebratulida	Terebratulidina	New Zealand	13.27	15.44	11.68	34.811	0.37495	0.3
DS431L	Bajnai et al., 2018	Liothyrella neozelanica	Terebratulida	Terebratulidina	New Zealand	13.27	15.44	11.68	34.811	0.37495	0.3
GS183L	Bajnai et al., 2018	Terebratella sanguinea	Terebratulida	Terebratellidina	New Zealand	13.85	16.57	12.2	34.863	0.39835
NN2V	Bajnai et al., 2018	Notosaria nigricans	Rhynchonellida		New Zealand	10.31	12.715	8.41	34.439	0.20755
WB5	Letulle et al., (this study)	Terebratella sanguinea	Terebratulida	Terebratellidina	New Zealand	13.6	15.9	11.3	34.7	0.325
WB6	Letulle et al., (this study)	Liothyrella neozelanica	Terebratulida	Terebratulidina	New Zealand	13.2	15.7	10.7	34.7	0.325	0.3
WB8	Letulle et al., (this study)	Notosaria nigricans	Rhynchonellida		New Zealand	10.4	12.4	8	34.34	0.163
FTD1	Bajnai et al., 2018	Terebratella dorsata	Terebratulida	Terebratellidina	Falkland	4.76	5.59	4.29	34.041	-0.28016
SAMID10116	Bajnai et al., 2018	Glaciarcula spitzbergensis	Terebratulida	Terebratellidina	Svalbard	1	3.89	-1.32	34.875	-0.08
WMF1	Bajnai et al., 2018	Magellania fragilis	Terebratulida	Terebratellidina	Antarctica	0.06	0.87	-0.8	34.572	-0.15844
MFRA-CEA	Letulle et al., (this study)	Magellania fragilis	Terebratulida	Terebratellidina	Antarctica	-1.9	-1.5	-1.9	34.7	-0.129
LUVA-PAL	Letulle et al., (this study)	Liothyrella uva	Terebratulida	Terebratulidina	Antarctica	-1.1	-0.7	-1.5	33.3	-0.451	-0.65
WB4A	Letulle et al., (this study)	Aerothyris kerguelenensis	Terebratulida	Terebratellidina	Crozet	3.9	4.5	3.3	33.971	-0.29696
WB4B	Letulle et al., (this study)	Aerothyris kerguelenensis	Terebratulida	Terebratellidina	Crozet	3.7	4.3	3.1	34.005	-0.2888
AKER-52	Letulle et al., (this study)	Aerothyris kerguelenensis	Terebratulida	Terebratellidina	Crozet	3.14	3.4	2.8	34.158	-0.25208
AKER-68	Letulle et al., (this study)	Aerothyris kerguelenensis	Terebratulida	Terebratellidina	Crozet	3.4	4.2	2.6	33.988	-0.29288
AKER-61	Letulle et al., (this study)	Aerothyris kerguelenensis	Terebratulida	Terebratellidina	Crozet	4.1	5.3	2.9	33.848	-0.32648
SCRO-1	Letulle et al., (this study)	Stenosarina crosnieri	Terebratulida	Terebratulidina	New Caledonia	10	10.9	9.1	34.76	0.5052
SGLO-M2	Letulle et al., (this study)	Stenosarina globosa	Terebratulida	Terebratulidina	New Caledonia	16.4	17.1	15.7	35.4	0.678
SGLO-M2*	Letulle et al., (this study)	Stenosarina globosa	Terebratulida	Terebratulidina	New Caledonia	16.4	17.1	15.7	35.4	0.678
TGAL-4	Letulle et al., (this study)	Tichosina cubensis	Terebratulida	Terebratulidina	Guadeloupe	16.6	17.6	15.6	36.22	0.823
TGAL-3	Letulle et al., (this study)	Tichosina cubensis	Terebratulida	Terebratulidina	Guadeloupe	16.6	17.6	15.6	36.22	0.823
TCUB-2*	Letulle et al., (this study)	Tichosina cubensis	Terebratulida	Terebratulidina	Guadeloupe	17.3	18.3	16.3	36.38	0.847
TPLI-2	Letulle et al., (this study)	Tichosina cf plicata	Terebratulida	Terebratulidina	Guadeloupe	23.5	24.5	22.5	36.87	0.9205
TDES-G1	Letulle et al., (this study)	Tichosina sp	Terebratulida	Terebratulidina	Guadeloupe	23.5	24.5	22.5	36.87	0.9205
TDES-B2	Letulle et al., (this study)	Tichosina sp	Terebratulida	Terebratulidina	Guadeloupe	23.5	24.5	22.5	36.87	0.9205

## Sheet: Geochemical data
Sample	Source	N	d13C (VPDB)	sterror	d18O (VPDB)	sterror	D47 (CDES 25)	sterror	D47 (CDES 90)	sterror	D47 (I-CDES)	sterror
130	Bajnai et al., 2018	10	-0.652623	0.017445	-0.395638	0.0580537	0.764946	0.00778921	0.683946	0.00778921
143	Bajnai et al., 2018; Fiebig et al., 2021	10	-0.328495	0.00876398	-0.0531564	0.040808	0.751237	0.00396796	0.670237	0.00396796	0.664	0.003
ChHP1	Bajnai et al., 2018	5	1.72496	0.00624588	0.390402	0.0116856	0.767216	0.00393431	0.686216	0.00393431
D487L	Bajnai et al., 2018	6	-0.877769	0.0156784	-0.560031	0.0193272	0.757482	0.00451286	0.676482	0.00451286
S006L	Bajnai et al., 2018	10	0.0891355	0.0345314	-0.0160698	0.0375492	0.749464	0.00708856	0.668464	0.00708856
PA.01	Bajnai et al., 2018	5	1.49724	0.00950764	0.525884	0.0146902	0.697568	0.00577367	0.616568	0.00577367
TC.01	Bajnai et al., 2018	5	0.814252	0.0105683	-2.19401	0.0233033	0.663812	0.00709485	0.582812	0.00709485
DA5.25.1	Bajnai et al., 2018	5	2.05035	0.00813178	0.632257	0.030889	0.700679	0.0101266	0.619679	0.0101266
DA5.25.2	Bajnai et al., 2018	4	1.75314	0.0193423	0.763554	0.0324634	0.683854	0.00715021	0.602854	0.00715021
DS288L	Bajnai et al., 2018	6	1.75915	0.00633525	1.1249	0.0153593	0.731876	0.0129214	0.650876	0.0129214
DS420L	Bajnai et al., 2018	6	0.747587	0.00770568	0.520769	0.011928	0.739864	0.00407185	0.658864	0.00407185
DS430L	Bajnai et al., 2018	6	2.16459	0.0194006	1.03166	0.0257821	0.720863	0.0071306	0.639863	0.0071306
DS431L	Bajnai et al., 2018	6	2.13302	0.00905789	1.07208	0.0269939	0.728976	0.0102929	0.647976	0.0102929
GS183L	Bajnai et al., 2018	5	1.15857	0.0124522	0.815024	0.0727179	0.747668	0.00408525	0.666668	0.00408525
NN2V	Bajnai et al., 2018	6	2.42821	0.00485458	1.68776	0.0154937	0.740943	0.00452062	0.659943	0.00452062
WB5	Letulle et al., (this study)	3	0.52	0.02	0.47	0.03					0.6639	0.0043
WB6	Letulle et al., (this study)	3	2.91	0.02	1.55	0.03					0.6295	0.0043
WB8	Letulle et al., (this study)	3	2.1	0.02	1.25	0.03					0.65	0.0043
FTD1	Bajnai et al., 2018	4	2.00399	0.00712367	2.31365	0.0108221	0.75396	0.00913748	0.67296	0.00913748
SAMID10116	Bajnai et al., 2018	4	1.45041	0.00856304	3.12987	0.0297382	0.767127	0.00679818	0.686127	0.00679818
WMF1	Bajnai et al., 2018	5	1.71474	0.00717926	3.92535	0.0200283	0.765154	0.00646495	0.684154	0.00646495
MFRA-CEA	Letulle et al., (this study)	4	1.01	0.02	3.98	0.03					0.6921	0.0039
LUVA-PAL	Letulle et al., (this study)	3	0.63	0.02	3.33	0.03					0.6941	0.00435
WB4A	Letulle et al., (this study)	5	2.5	0.02	2.96	0.03					0.6664	0.00355
WB4B	Letulle et al., (this study)	5	1.86	0.02	2.79	0.03					0.6752	0.00355
AKER-52	Letulle et al., (this study)	3	2.03	0.02	3.37	0.03					0.667	0.00435
AKER-68	Letulle et al., (this study)	5	1.57	0.02	2.57	0.03					0.6811	0.00355
AKER-61	Letulle et al., (this study)	5	1.36	0.02	2.26	0.03					0.6869	0.00365
SCRO-1	Letulle et al., (this study)	3	2.72	0.01	2.04	0.02					0.6387	0.00545
SGLO-M2	Letulle et al., (this study)	2	2.8	0.01	0.88	0.02					0.621	0.00655
SGLO-M2*	Letulle et al., (this study)	3	1.87	0.01	0.91	0.02					0.6388	0.00545
TGAL-4	Letulle et al., (this study)	5	2.75	0.03	1.44	0.03					0.6113	0.00345
TGAL-3	Letulle et al., (this study)	5	1.97	0.05	1.22	0.1					0.6312	0.0043
TCUB-2*	Letulle et al., (this study)	5	1.75	0.01	1.08	0.02					0.6248	0.0043
TPLI-2	Letulle et al., (this study)	4	2.75	0.01	0.14	0.01					0.5974	0.0047
TDES-G1	Letulle et al., (this study)	4	2.68	0.01	0.18	0.02					0.6049	0.00475
TDES-B2	Letulle et al., (this study)	2	2.58	0.01	0.26	0.02					0.6086	0.00655

## Sheet: Equation comparison
Sample	Source	Order	Suborder (for terebratulida)	MAT (°C)	T var (°C)		D47 (CDES 90 or I-CDES)	D47 SE		T (Anders) °C	T CI	Offset T (Anders °C)	Offset CI		T (Meinicke) °C	T CI	Offset T (Meinicke °C)	Offset CI		T (Peral) °C	T CI	Offset T (Peral °C)	Offset 95% CL		T (Huyghe) °C	T CI	Offset T (Huyghe °C)	Offset CI
130	Bajnai et al., 2018	Terebratulida	Terebratellidina	11.36	1.71		0.683946	0.00778921		-1.52334	3.9924	-12.8833	5.7024		-0.013541	3.99799	-11.3735	5.70799		-1.91858	4.2006	-13.2786	5.9106		-0.934452	4.13366	-12.2945	5.84366
143	Bajnai et al., 2018	Terebratulida	Terebratellidina	11.36	1.71		0.670237	0.00396796		2.05986	2.11535	-9.30014	3.82535		3.57439	2.11797	-7.78561	3.82797		1.85551	2.23044	-9.50449	3.94044		2.77797	2.19309	-8.58203	3.90309
ChHP1	Bajnai et al., 2018	Rhynchonellida		1.56	2.125		0.686216	0.00393431		-2.10312	2.00367	-3.66312	4.12867		-0.594136	2.00653	-2.15414	4.13153		-2.52849	2.10743	-4.08849	4.23243		-1.53468	2.07412	-3.09468	4.19912
D487L	Bajnai et al., 2018	Terebratulida	Terebratellidina	8.59	0.96		0.676482	0.00451286		0.41013	2.36284	-8.17987	3.32284		1.92255	2.36594	-6.66745	3.32594		0.11689	2.48892	-8.47311	3.44892		1.06814	2.44818	-7.52186	3.40818
S006L	Bajnai et al., 2018	Terebratulida	Terebratellidina	8.39	0.535		0.668464	0.00708856		2.53348	3.79851	-5.85652	4.33351		4.04858	3.80312	-4.34142	4.33812		2.35497	4.00631	-6.03503	4.54131		3.26904	3.9388	-5.12096	4.4738
PA.01	Bajnai et al., 2018	Thecideida		20.92	2.115		0.616568	0.00577367		17.5871	3.62891	-3.3329	5.74391		19.1151	3.63072	-1.80486	5.74572		18.3058	3.86339	-2.61417	5.97839		18.9233	3.78468	-1.99673	5.89968
TC.01	Bajnai et al., 2018	Thecideida		28.914	0.76		0.582812	0.00709485		28.814	4.99611	-0.100045	5.75611		30.3445	4.9958	1.43046	5.7558		30.3017	5.3581	1.38773	6.1181		30.6583	5.23413	1.7443	5.99413
DA5.25.1	Bajnai et al., 2018	Terebratulida	Terebratellidina	24.84	3.18		0.619679	0.0101266		16.6145	6.30121	-8.22554	9.48121		18.142	6.30464	-6.69801	9.48464		17.2707	6.70418	-7.56933	9.88418		17.9091	6.56917	-6.93093	9.74917
DA5.25.2	Bajnai et al., 2018	Terebratulida	Terebratellidina	24.84	3.18		0.602854	0.00715021		21.9953	4.70164	-2.84469	7.88164		23.5251	4.70296	-1.31494	7.88296		23.0055	5.01968	-1.83447	8.19968		23.5247	4.91204	-1.31529	8.09204
DS288L	Bajnai et al., 2018	Terebratulida	Terebratellidina	13.27	1.88		0.650876	0.0129214		7.37023	7.29501	-5.89977	9.17501		8.89067	7.30222	-4.37933	9.18222		7.46381	7.71677	-5.80619	9.59677		8.28897	7.57818	-4.98103	9.45818
DS420L	Bajnai et al., 2018	Terebratulida	Terebratellidina	13.27	1.88		0.658864	0.00407185		5.14227	2.2445	-8.12773	4.1245		6.66039	2.24695	-6.60961	4.12695		5.10865	2.37103	-8.16135	4.25103		5.9755	2.32966	-7.2945	4.20966
DS430L	Bajnai et al., 2018	Terebratulida	Terebratulidina	13.27	1.88		0.639863	0.0071306		10.5318	4.16336	-2.73816	6.04336		12.0552	4.16685	-1.21484	6.04685		10.8115	4.41268	-2.45853	6.29268		11.5753	4.33018	-1.69472	6.21018
DS431L	Bajnai et al., 2018	Terebratulida	Terebratulidina	13.27	1.88		0.647976	0.0102929		8.19253	5.86232	-5.07747	7.74232		9.71376	5.86788	-3.55624	7.74788		8.33387	6.20438	-4.93613	8.08438		9.14332	6.09177	-4.12668	7.97177
GS183L	Bajnai et al., 2018	Terebratulida	Terebratellidina	13.85	2.185		0.666668	0.00408525		3.01609	2.20066	-10.8339	4.38566		4.53178	2.20328	-9.31822	4.38828		2.86406	2.32173	-10.9859	4.50673		3.76952	2.28235	-10.0805	4.46735
NN2V	Bajnai et al., 2018	Rhynchonellida		10.31	2.1525		0.659943	0.00452062		4.84535	2.4839	-5.46465	4.6364		6.36314	2.48665	-3.94686	4.63915		4.79502	2.62345	-5.51498	4.77595		5.66734	2.57786	-4.64266	4.73036
WB5	Letulle et al., (this study)	Terebratulida	Terebratellidina	13.6	2.3		0.6639	0.0043		3.76461	2.33523	-9.83539	4.63523		5.28118	2.33793	-8.31882	4.63793		3.65393	2.46481	-9.94607	4.76481		4.54594	2.42259	-9.05406	4.72259
WB6	Letulle et al., (this study)	Terebratulida	Terebratulidina	13.2	2.5		0.6295	0.0043		13.6064	2.59317	0.406399	5.09317		15.1321	2.59496	1.93207	5.09496		14.0733	2.75376	0.873281	5.25376		14.7749	2.70028	1.57493	5.20028
WB8	Letulle et al., (this study)	Rhynchonellida		10.4	2.2		0.65	0.0043		7.61796	2.43408	-2.78204	4.63408		9.13863	2.43645	-1.26137	4.63645		7.72588	2.57519	-2.67412	4.77519		8.54632	2.5288	-1.85368	4.7288
FTD1	Bajnai et al., 2018	Terebratulida	Terebratellidina	4.76	0.65		0.67296	0.00913748		1.33674	4.83297	-3.42326	5.48297		2.85036	4.8391	-1.90964	5.4891		1.09322	5.09369	-3.66678	5.74369		2.02838	5.00924	-2.73162	5.65924
SAMID10116	Bajnai et al., 2018	Terebratulida	Terebratellidina	1	2.605		0.686127	0.00679818		-2.08056	3.46304	-3.08056	6.06804		-0.571545	3.46798	-1.57155	6.07298		-2.50476	3.64244	-3.50476	6.24744		-1.51133	3.58484	-2.51133	6.18984
WMF1	Bajnai et al., 2018	Terebratulida	Terebratellidina	0.06	0.835		0.684154	0.00646495		-1.57641	3.3117	-1.63641	4.1467		-0.0666797	3.31635	-0.12668	4.15135		-1.97441	3.4843	-2.03441	4.3193		-0.989393	3.42881	-1.04939	4.26381
MFRA-CEA	Letulle et al., (this study)	Terebratulida	Terebratellidina	-1.9	0.2		0.6921	0.0039		-3.58911	1.9537	-1.68911	2.1537		-2.0823	1.95662	-0.182301	2.15662		-4.09075	2.05308	-2.19075	2.25308		-3.0725	2.02131	-1.1725	2.22131
LUVA-PAL	Letulle et al., (this study)	Terebratulida	Terebratulidina	-1.1	0.4		0.6941	0.00435		-4.08867	2.16704	-2.98867	2.56704		-2.58261	2.17033	-1.48261	2.57033		-4.61565	2.2766	-3.51565	2.6766		-3.5893	2.24162	-2.4893	2.64162
WB4A	Letulle et al., (this study)	Terebratulida	Terebratellidina	3.9	0.6		0.6664	0.00355		3.08825	1.91383	-0.811747	2.51383		4.60403	1.9161	0.704026	2.5161		2.94019	2.0192	-0.95981	2.6192		3.84436	1.98492	-0.0556353	2.58492
WB4B	Letulle et al., (this study)	Terebratulida	Terebratellidina	3.7	0.6		0.6752	0.00355		0.746306	1.86556	-2.95369	2.46556		2.25917	1.86798	-1.44083	2.46798		0.471041	1.96551	-3.22896	2.56551		1.41648	1.93318	-2.28352	2.53318
AKER-52	Letulle et al., (this study)	Terebratulida	Terebratellidina	3.14	0.3		0.667	0.00435		2.92666	2.341	-0.213337	2.641		4.44224	2.3438	1.30224	2.6438		2.76971	2.46965	-0.370288	2.76965		3.67678	2.42782	0.536777	2.72782
AKER-68	Letulle et al., (this study)	Terebratulida	Terebratellidina	3.4	0.8		0.6811	0.00355		-0.790912	1.83433	-4.19091	2.63433		0.719902	1.83684	-2.6801	2.63684		-1.14779	1.93083	-4.54779	2.73083		-0.176007	1.89974	-3.57601	2.69974
AKER-61	Letulle et al., (this study)	Terebratulida	Terebratellidina	4.1	1.2		0.6869	0.00365		-2.27712	1.85529	-6.37712	3.05529		-0.768393	1.85796	-4.86839	3.05796		-2.7115	1.95118	-6.8115	3.15118		-1.7148	1.92041	-5.8148	3.12041
SCRO-1	Letulle et al., (this study)	Terebratulida	Terebratulidina	10	0.9		0.6387	0.00545		10.8719	3.19356	0.871926	4.09356		12.3955	3.19619	2.39553	4.09619		11.172	3.38552	1.17196	4.28552		11.929	3.32196	1.92902	4.22196
SGLO-M2	Letulle et al., (this study)	Terebratulida	Terebratulidina	16.4	0.7		0.621	0.00655		16.2043	4.0584	-0.195701	4.7584		17.7316	4.06069	1.3316	4.76069		16.8343	4.31681	0.434326	5.01681		17.4815	4.2303	1.0815	4.9303
SGLO-M2*	Letulle et al., (this study)	Terebratulida	Terebratulidina	16.4	0.7		0.6388	0.00545		10.8426	3.19257	-5.55737	3.89257		12.3662	3.1952	-4.03379	3.8952		11.1409	3.38442	-5.25909	4.08442		11.8985	3.32089	-4.50146	4.02089
TGAL-4	Letulle et al., (this study)	Terebratulida	Terebratulidina	16.6	1		0.6113	0.00345		19.257	2.206	2.65701	3.206		20.7858	2.20692	4.18581	3.20692		20.0846	2.35106	3.48458	3.35106		20.6654	2.30221	4.06543	3.30221
TGAL-3	Letulle et al., (this study)	Terebratulida	Terebratulidina	16.6	1		0.6312	0.0043		13.0952	2.57933	-3.50483	3.57933		14.6205	2.58117	-1.97952	3.58117		13.5305	2.73817	-3.06952	3.73817		14.2426	2.68533	-2.35737	3.68533
TCUB-2*	Letulle et al., (this study)	Terebratulida	Terebratulidina	17.3	1		0.6248	0.0043		15.0342	2.6321	-2.26581	3.6321		16.5608	2.63373	-0.739202	3.63373		15.5902	2.79762	-1.70983	3.79762		16.2621	2.74234	-1.0379	3.74234
TPLI-2	Letulle et al., (this study)	Terebratulida	Terebratulidina	23.5	1		0.5974	0.0047		23.8049	3.1477	0.304926	4.1477		25.3351	3.14829	1.8351	4.14829		24.9387	3.36459	1.43869	4.36459		25.416	3.29095	1.91599	4.29095
TDES-G1	Letulle et al., (this study)	Terebratulida	Terebratulidina	23.5	1		0.6049	0.00475		21.3249	3.10214	-2.17511	4.10214		22.8544	3.10311	-0.645562	4.10311		22.2899	3.31054	-1.2101	4.31054		22.8244	3.2401	-0.675627	4.2401
TDES-B2	Letulle et al., (this study)	Terebratulida	Terebratulidina	23.5	1		0.6086	0.00655		20.1241	4.22557	-3.37593	5.22557		21.6532	4.22715	-1.84679	5.22715		21.0089	4.50594	-2.49109	5.50594		21.5705	4.41138	-1.92955	5.41138

## Sheet: T offset per dataset
Equation	Anderson et al. (2021)	Meinicke et al. (2021)	Peral et al. (2022)	Huyghe et al. (2022)
All data (N=37)
Mean T offset (°C)	-3.92823	-2.40906	-3.77461	-2.97089
2 SE of mean T offset	1.15569	1.15662	1.23943	1.20946
NB significant offset	13	9	14	13
Bajnai et al., 2018 dataset (N=18)
Mean T offset	-5.59267	-4.07458	-5.50439	-4.67917
2 SE of mean T offset	1.60161	1.60269	1.72388	1.67972
NB significant offset	7	5	7	7
This study dataset (N=19)
Mean T offset	-2.3514	-0.831206	-2.13588	-1.35251
2 SE of mean T offset	1.33076	1.33222	1.44825	1.40583
NB significant offset	6	4	7	7
Terebratulidina (N=13)
Mean T offset	-1.81837	-0.293726	-1.3267	-0.634288
2 SE of mean T offset	1.35659	1.35775	1.46846	1.42788
NB significant offset	2	2	3	2
Terebratellidina (N=19)
Mean T offset	-5.59805	-4.08317	-5.73208	-4.83335
2 SE of mean T offset	1.68718	1.68693	1.69076	1.6875
NB significant offset	9	7	10	10
