# Supplementary material for: Multi-proxy assessment of brachiopod shell calcite as a potential archive of seawater temperature and oxygen isotope composition
Source: Copernicus journal article supplement (doi:10.5194/bg-20-1381-2023), 2023-04-12
Supplement: Supplementary file [file bg-20-1381-2023-supplement-title-page.pdf › bg-20-1381-2023-supplement-title-page.pdf]

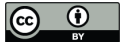

## *Supplement of*

# **Multi-proxy assessment of brachiopod shell calcite as a potential archive of seawater temperature and oxygen isotope composition**

**Thomas Letulle et al.**

*Correspondence to:* Thomas Letulle ([thomas.letulle@univ-lyon1.fr](mailto:thomas.letulle@univ-lyon1.fr))

- [bg-20-1381-2023-supplement-title-page.pdf](#)
- Supplementary
  - [S1 Data table.xlsx](#)
  - [S2 sample collection.docx](#)
  - [S3 Brachiopod clumped isotope data.xlsx](#)
  - [S4 D47report\\_Letulle\\_2020\\_01.pdf](#)
  - [S5 D47report\\_Letulle\\_2022\\_03.pdf](#)

The copyright of individual parts of the supplement might differ from the article licence.
